## Verzeichnis der Quellen bzw. der Mediendokumente

### Protokolle und Drucksachen des Deutschen Bundestages online unter:

a) Protokolle der Debatten

<http://dip21.bundestag.de/dip21/btp/14/14173.pdf> (Bundestagsdebatte vom 31.5.2001)

<http://dip21.bundestag.de/dip21/btp/14/14214.pdf> (Bundestagsdebatte vom 30.1.2002)

b) Drucksachen

<http://dip21.bundestag.de/dip21/btd/14/081/1408101.pdf>

<http://dip21.bundestag.de/dip21/btd/14/081/1408102.pdf>

<http://dip21.bundestag.de/dip21/btd/14/081/1408103.pdf>

### Protokoll der Bundestagsdebatte vom 30.1.2002 als Printversion

Deutscher Bundestag Referat Öffentlichkeitsarbeit (Hrsg.) (2002): Enquete-Kommission Recht und Ethik der modernen Medizin. Band 1: Stammzellforschung und die Debatte des Deutschen Bundestages zum Import von menschlichen embryonalen Stammzellen, Paderborn.

### Dokumente der FAZ

[FAZ 11.11.98] Frankfurter Allgemeine Zeitung (1998): Körpergewebe nach Maß? Embryonale Stammzellen bald beliebig manipulierbar. In: Frankfurter Allgemeine Zeitung Nr. 262 (11.11.1998), S. N1.

[FAZ 29.12.98] Adam, Konrad (1998): Gebt uns den Rest! Wollen die Leute, was ihnen die Forschung verspricht? In: Frankfurter Allgemeine Zeitung Nr. 301 (29.12.1998), S. 27.

[FAZ 31.3.99a] Kaulen, Hildegard (1999): Heikle Forschung mit Stammzellen. Embryonen des Menschen als Quelle. Ethische und rechtliche Bedenken. In: Frankfurter Allgemeine Zeitung Nr. 76 (31.03. 1999), S. N1.

[FAZ 31.3.99b] Frankfurter Allgemeine Zeitung (1999) (ohne Verfasser): Kollision. In: Frankfurter Allgemeine Zeitung Nr. 76 (31.03. 1999), S. N1.

[FAZ 13.4.99] Haverich, Axel (1999): Ein menschliches Ersatzteillager. Was die einen von der Gentherapie erhoffen, fürchten die anderen. In: Frankfurter Allgemeine Zeitung Nr. 85 (13.04. 1999), S. 53.

[FAZ 23.6.99] Lenzen, Manuela (1999): Auf den Spuren des Sisyphus. Einheit, ohne Vielfalt zu verletzen: Eine Tübinger Tagung über Ethik und Wissenschaft. In: Frankfurter Allgemeine Zeitung Nr. 142 (23.06. 1999), S. N5.

[FAZ 1.12.99] Frankfurter Allgemeine Zeitung (1999) (ohne Verfasser): Zu wenig Schutz vor Eingriffen? Bioethik-Konvention tritt ohne Beteiligung Deutschlands in Kraft. In: Frankfurter Allgemeine Zeitung Nr. 280 (01.12. 1999), S. 4.

- [FAZ 29.3.00] Winnacker, Ernst-Ludwig (2000): Stammzellen – Verheißung für die Biomedizin. Therapeutische Visionen und ethisch-rechtliche Grenzl意思. In: Frankfurter Allgemeine Zeitung Nr. 75 (29.03.2000), S. 14.
- [FAZ 27.5.00a] Kegel, Sandra (2000): Was will Austin Smith? Die unsterbliche Zelle: Der Embryo des Menschen als Potential. In: Frankfurter Allgemeine Zeitung Nr. 123 (27.05.2000), S. 41.
- [FAZ 27.5.00b] Kegel, Sandra/Müller-Jung, Joachim (2000): Ich bin der Erste, der offen über unsere Visionen spricht. Austin Smith ruft die Genforscher zu klaren Worten auf – Ein Gespräch über die Zukunft des menschlichen Lebens. In: Frankfurter Allgemeine Zeitung Nr. 123 (27.05.2000), S. 43.
- [FAZ 27.5.00c] Müller-Jung, Joachim (2000): Experimentieren mit Embryonen? Ein Gespräch mit dem britischen Genforscher Austin Smith. In: Frankfurter Allgemeine Zeitung Nr. 123 (27.05.2000), S. 1.
- [FAZ 27.5.00d] Müller-Jung, Joachim (2000): Fiebrig. Stammzellen für maßgeschneiderte Organe. In: Frankfurter Allgemeine Zeitung Nr. 123 (27.05.2000), S. 43.
- [FAZ 29.5.00] Kaube, Jürgen (2000): Fortschritt. Grenzen der Abwägung? In: Frankfurter Allgemeine Zeitung Nr. 124 (29.05.2000), S. 49.
- [FAZ 7.6.00] Wandtner, Reinhard (2000): Erneuerung im kranken Gehirn. Neurotransplantation noch im experimentellen Stadium. In: Frankfurter Allgemeine Zeitung Nr. 131 (07.06.2000), S. N1.
- [FAZ 20.6.00] Frankfurter Allgemeine Zeitung (2000) (ohne Verfasser): Nun also doch. Deutschland will Stammzellen importieren. In: Frankfurter Allgemeine Zeitung Nr. 141 (20.06.2000), S. 55.
- [FAZ 21.6.00a] Bahnert, Patrick u.a. (2000): Brauchen wir eine Theologie der Roboter? Biotechnologie ist nicht böse: Wer dem Schöpfer nicht ins Handwerk pfuschen will, vergisst vielleicht die Nächstenliebe. Ein Gespräch mit Klaus Berger. In: Frankfurter Allgemeine Zeitung Nr. 142 (21.06.2000), S. 55.
- [FAZ 21.6.00b] Frankfurter Allgemeine Zeitung (2000) (ohne Verfasser): Knochenmarkzellen wandern in die Leber. In: Frankfurter Allgemeine Zeitung Nr. 142 (21.06.2000), S. 55.
- [FAZ 21.6.00c] Hobom, Barbara (2000): Was der Salamander kann, vermag der Mensch noch lange nicht. Stammzellen wecken Hoffnung auf neue medizinische Behandlungsformen. In: Frankfurter Allgemeine Zeitung Nr. 142 (21.06.2000), S. 13.
- [FAZ 23.6.00] Frankfurter Allgemeine Zeitung (2000) (ohne Verfasser): Alternativ. DFG verteidigt Stammzellenforschung. In: Frankfurter Allgemeine Zeitung Nr. 143 (23.06.2000), S. 55.
- [FAZ 14.8.00a] Frankfurter Allgemeine Zeitung (2000) (ohne Verfasser): Therapeutisches Klonen im Tierversuch gelungen. In: Frankfurter Allgemeine Zeitung Nr. 187 (14.08.2000), S. 1.
- [FAZ 14.8.00b] Müller-Jung, Joachim (2000): Das Tor zum therapeutischen Klonen ist offen, Forschern ist die Nachbildung körpereigener Organe bei Mäusen gelungen. In: Frankfurter Allgemeine Zeitung Nr. 187 (14.08.2000), S. 9.
- [FAZ 17.8.00] Frankfurter Allgemeine Zeitung (2000) (ohne Verfasser): Britische Fachleute empfehlen „therapeutisches Klonen“. Die Forschung an embryonalen Stammzellen und die Züchtung von Organersatz sollen erleichtert werden. In: Frankfurter Allgemeine Zeitung Nr. 190 (17.08.2000), S. 1.
- [FAZ 18.8.00a] Berger, Klaus (2000): Höchstes Gut. In: Frankfurter Allgemeine Zeitung Nr. 191 (18.08.2000), S. 43.
- [FAZ 18.8.00b] Brüstle, Oliver (2000): Der Patient ist das Maß aller Dinge: Plädoyer für die Arbeit mit Stammzellen. In: Frankfurter Allgemeine Zeitung Nr. 191 (18.08.2000), S. 41.
- [FAZ 18.8.00c] Frankfurter Allgemeine Zeitung (2000) (ohne Verfasser): Fischer gegen übereilte Lockerung des Embryonenschutzes. Die Gesundheitsministerin warnt. In: Frankfurter Allgemeine Zeitung Nr. 191 (18.08.2000), S. 1.

- [FAZ 18.8.00d] Frankfurter Allgemeine Zeitung (2000) (ohne Verfasser): Europäische Kommission unentschieden. In: Frankfurter Allgemeine Zeitung Nr. 191 (18.08.2000), S. 2.
- [FAZ 18.8.00e] Frankfurter Allgemeine Zeitung (2000) (ohne Verfasser): Begeisterte Forscher, skeptische Ethiker. In: Frankfurter Allgemeine Zeitung Nr. 191 (18.08.2000), S. 2.
- [FAZ 18.8.00f] Hefty, Georg Paul (2001): Die Freiheit der Selbstbeschränkung. In: Frankfurter Allgemeine Zeitung Nr. 191 (18.08.2000), S. 1.
- [FAZ 18.8.00g] Honnefelder, Ludger (2000): Ohne Alternative? In: Frankfurter Allgemeine Zeitung Nr. 191 (18.08.2000), S. 43.
- [FAZ 18.8.00h] Mieth, Dietmar (2000): Ohne Garantie. In: Frankfurter Allgemeine Zeitung Nr. 191 (18.08.2000), S. 43.
- [FAZ 18.8.00i] Müller-Jung, Joachim (2000): In der Embryonen-Falle. Woher Stammzellen nehmen und nicht importieren? – Zum Problem des therapeutischen Klonens. In: Frankfurter Allgemeine Zeitung Nr. 191 (18.08.2000), S. 41.
- [FAZ 18.8.00j] Rifkin, Jeremy (200): Nicht weiter! In: Frankfurter Allgemeine Zeitung Nr. 191 (18.08.2000), S. 43.
- [FAZ 18.8.00k] Flöhl, Rainer (2000): Gefährlicher Forscherdrang. In: Frankfurter Allgemeine Zeitung Nr. 191 (18.08.2000), S. 1.
- [FAZ 20.8.00a] Beier, Henning (2000): Unterschiedliches Recht für menschliche Embryonen. Menschenwürde nur nach Reagenzglasbefruchtung. In: Frankfurter Allgemeine Zeitung Nr. 201 (20.08.2000), S. N4.
- [FAZ 20.8.00b] Frankfurter Allgemeine Zeitung (2000) (ohne Verfasser): Regeln für Forschung an Stammzellen. In: Frankfurter Allgemeine Zeitung Nr. 197 (25.08.2000), S. 2.
- [FAZ 20.8.00c] Frankfurter Allgemeine Zeitung (2000) (ohne Verfasser): Haut-Stammzellen aus dem Haarbalg. In: Frankfurter Allgemeine Zeitung Nr. 201 (20.08.2000), S. N2.
- [FAZ 21.8.00] Lüke, Ulrich (2000): Den Teufel wird man nie erwischen. Über das therapeutische Klonen menschlicher Embryonen. In: Frankfurter Allgemeine Zeitung Nr. 193 (21.08.2000), S. 11.
- [FAZ 8.9.00] Müller-Jung, Joachim (2000): Austin Smith. In: Frankfurter Allgemeine Zeitung Nr. 209 (08.09.2000), S. 51.
- [FAZ 18.9.00] Winnacker, Ernst-Ludwig (2000): Unter jedem Stein glänzt ein Diamant. Unterwegs in das Jahrhundert der Naturforschung. In: Frankfurter Allgemeine Zeitung Nr. 217 (18.09.2000), S. 60.
- [FAZ 8.11.00] Frankfurter Allgemeine Zeitung (2000) (ohne Verfasser): Leber aus dem Knochenmark. Organfunktion wiederhergestellt. In: Frankfurter Allgemeine Zeitung Nr. 260 (08.11.2000), S. N1.
- [FAZ 1.12.00] Müller-Jung, Joachim (2000): Greenpeace und die kommende Verdrehung der Arten. Unser Zeitalter wird zur Kenntlichkeit entstellt: Mischwesen, Mutantenfabriken und andere Monstrositäten der Genrevolution. In: Frankfurter Allgemeine Zeitung Nr. 280 (01.12.2000), S. 43.
- [FAZ 8.12.00] Blair, Tony (2000): Wir werden Europa führen. In Großbritannien wird das biotechnische Zeitalter beginnen. In: Frankfurter Allgemeine Zeitung Nr. 286 (08.12.2000), S. 45.
- [FAZ 14.12.00] Frankfurter Allgemeine Zeitung (2000) (ohne Verfasser): Merkel: Die Politik muß der Wissenschaft Grenzen setzen. Die CDU-Vorsitzende fordert eine breite Debatte über Gentechnik. In: Frankfurter Allgemeine Zeitung Nr. 291 (14.12.2000), S. 1.
- [FAZ 21.12.00a] Frankfurter Allgemeine Zeitung (2000) (ohne Verfasser): 366 Stimmen für die Neuregelung. In: Frankfurter Allgemeine Zeitung Nr. 297 (21.12.2000), S. 2.

- [FAZ 21.12.00b] Frankfurter Allgemeine Zeitung (2000) (ohne Verfasser): „Deutschland braucht mehr Stammzellen-Forschung“. Reaktion auf das Klonen in England. In: Frankfurter Allgemeine Zeitung Nr. 297 (21.12.2000), S. 17.
- [FAZ 21.12.00c] Frankfurter Allgemeine Zeitung (2000) (Ohne Verfasser): „Britische Entscheidung ein ethischer Dambruch“. In: Frankfurter Allgemeine Zeitung Nr. 297 (21.12. 2000), S. 1.
- [FAZ 21.12.00d] Müller-Jung, Joachim (2000): Was können wir wissen? Was sollen wir tun? Was dürfen wir hoffen? Gespräch mit dem Bonner Neuropathologen Oliver Brüstle, einem Pioniere der Stammzellenforschung in Deutschland. In: Frankfurter Allgemeine Zeitung Nr. 297 (21.12.2000), S. 51.
- [FAZ 21.12.00e] Schirmacher, Frank (2000): Die Evolution in unserer Hand. In: Frankfurter Allgemeine Zeitung Nr. 297 (21.12. 2000), S. 1.
- [FAZ 21.12.00f] Schirmacher, Frank (2001): Privatschule des Lebens. Der Embryo im Zeitalter Gerhard Schröders. In: Frankfurter Allgemeine Zeitung Nr. 118 (22.05.2001), S. 49.
- [FAZ 22.12.00] Frankfurter Allgemeine Zeitung (2000) (ohne Verfasser): Hoppe beklagt „Sieg des Kommerz“. Kritik der Ärztekammer an britischem Beschluß zum Klonen. In: Frankfurter Allgemeine Zeitung Nr. 298 (22.12. 2000), S. 6.
- [FAZ 28.12.00] Frankfurter Allgemeine Zeitung (2000) (ohne Verfasser): Stammzellentyp im Labor vermehrt. „Fortschritt für Transplantation“. In: Frankfurter Allgemeine Zeitung Nr. 301 (28.12. 2000), S. 11.
- [FAZ 29.12.00a] Frankfurter Allgemeine Zeitung (2000) (ohne Verfasser): „Überzählige Embryonen für Forschung nutzen“. In: Frankfurter Allgemeine Zeitung Nr. 302 (29.12. 2000), S. 1.
- [FAZ 29.12.00b] Sewing, Karl-Friedrich (2000): Warum nicht Embryonen? Gegen eine Ethik mit Scheuklappen. In: Frankfurter Allgemeine Zeitung Nr. 302 (29.12. 2000), S. 41.
- [FAZ 30.12.00] Frankfurter Allgemeine Zeitung (2000) (ohne Verfasser): Was wollen sie nur? In: Frankfurter Allgemeine Zeitung Nr. 303 (30.12. 2000), S. 41.
- [FAZ 3.1.01] Frankfurter Allgemeine Zeitung (2001) (ohne Verfasser): Robuste Stammzellen. Aus fetaler Keimbahn isoliert. In: Frankfurter Allgemeine Zeitung Nr. 2 (03.01.2001), S. N1.
- [FAZ 4.1.01a] Frankfurter Allgemeine Zeitung (2001) (ohne Verfasser): „Keine Verletzung der Menschenwürde“. In: Frankfurter Allgemeine Zeitung Nr. 3 (04.01.2001), S. 4.
- [FAZ 4.1.01b] Frankfurter Allgemeine Zeitung (2001) (ohne Verfasser): Nida-Rümelins Wende. In: Frankfurter Allgemeine Zeitung Nr. 3 (04.01.2001), S. 41.
- [FAZ 06.01.01] Mertens, Alfred (2001). Für das Leben in allen seinen Phasen. Brief an die Herausgeber. In: Frankfurter Allgemeine Zeitung Nr. 5 (06.01.2001), S. 49.
- [FAZ 8.1.01] Frankfurter Allgemeine Zeitung (2001) (ohne Verfasser): Minister für Unkultur. Aufregung um Julian Nida-Rümelin. In: Frankfurter Allgemeine Zeitung Nr. 6 (08.01.2001), S. 39.
- [FAZ 9.1.01a] Frankfurter Allgemeine Zeitung (2001) (ohne Verfasser): Nida-Rümelin verteidigt Thesen zu Embryonen. In: Frankfurter Allgemeine Zeitung Nr. 7 (09.01.2001), S. 4.
- [FAZ 9.1.01b] Nikolajczyk, Paul (2001): Mensch im Werden. Brief an den Herausgeber. In: Frankfurter Allgemeine Zeitung Nr. 7 (09.01.2001), S. 10.
- [FAZ 12.1.01] Geyer, Christian (2001): Teufelszeug. „Darf man töten, um. ...?“ Was der Bundeskanzler antwortet. In: Frankfurter Allgemeine Zeitung Nr. 10 (12.01.2001), S. 43.
- [FAZ 15.1.01a] Frankfurter Allgemeine Zeitung (2001) (ohne Verfasser): Killerphrasen. Streit im Bundestag über Nida-Rümelin? In: Frankfurter Allgemeine Zeitung Nr. 12 (15.01.2001), S. 45.

- [FAZ 15.1.01b] Zickler, Susanne (2001): Geschickte Rhetorik in der Embryonen-Debatte. In: Frankfurter Allgemeine Zeitung Nr. 12 (15.01.2001), S. 10.
- [FAZ 17.1.01] Frankfurter Allgemeine Zeitung (2001) (ohne Verfasser): Gentechnik-Gesetz wird zunächst gestoppt. In: Frankfurter Allgemeine Zeitung Nr. 14 (17.01.2001), S. 4.
- [FAZ 19.1.01a] Frankfurter Allgemeine Zeitung (2001) (ohne Verfasser): Neue Kritik an Nida-Rümelin „Begriff der Menschenwürde verworfen“. Philosoph Spaemann: Bioethische Thesen des Staatsministers inakzeptabel. In: Frankfurter Allgemeine Zeitung Nr. 16 (19.01.2001), S. 2.
- [FAZ 19.1.01b] Frankfurter Allgemeine Zeitung (2001) (ohne Verfasser): Inopportun. In: Frankfurter Allgemeine Zeitung Nr. 16 (19.01.2001), S. 41.
- [FAZ 20.1.01a] Frankfurter Allgemeine Zeitung (2001) (ohne Verfasser): Diskussion über Genforschung gefordert. Däubler-Gmelin: Embryonenschutz nicht aufweichen. In: Frankfurter Allgemeine Zeitung Nr. 17 (20.01.2001), S. 4.
- [FAZ 20.1.01b] Frankfurter Allgemeine Zeitung (2001) (ohne Verfasser): DFG lehnt Aufschub in Stammzellfrage ab. In: Frankfurter Allgemeine Zeitung Nr. 244 (20.10.2001), S. 2.
- [FAZ 24.1.01] Wieland, Barbara (2001): „Nicht die Wissenschaft – die Gesellschaft ist in der Pflicht“. Der Bonner Neurowissenschaftler Oliver Brüstle verteidigt die Forschung an embryonalen Stammzellen. In: Frankfurter Allgemeine Zeitung Nr. 20 (24.01.2001), S. 11.
- [FAZ 25.1.01] Hohenthal, Carl Graf von (2001): Schröders Schlingerkurs in der Gentechnik-Politik. Vorstöße und Rückzieher. Auch die Union sucht noch ihre Position. In: Frankfurter Allgemeine Zeitung Nr. 21 (25.01.2001), S. 4.
- [FAZ 31.1.01] Hohenthal, Carl Graf von (2001): Naschen vom Baum der Erkenntnis. In: Frankfurter Allgemeine Zeitung Nr. 26 (31.01.2001), S. 1.
- [FAZ 2.2.01] Rötzer, Florian (2001): Mein Genom gehört mir. Klonen – die letzte Grenze wird fallen. In: Frankfurter Allgemeine Zeitung Nr. 28 (02.02.2001), S. 41.
- [FAZ 3.2.01] Klein, Heribert (2001): Der Mensch ist mehr als die Summe seiner Gene. Ernst-Ludwig Winnacker hat viele Berufe: Er ist der Präsident der Deutschen Forschungsgemeinschaft, Wissenschaftsmanager und vor allem Biochemiker. In: Frankfurter Allgemeine Zeitung Nr. 29 (03.02.2001), S. 15.
- [FAZ 5.2.01] Berhorst, Ralf (2001): Forschung im Dschungel: In Berlin wurde das „Jahr der Lebenswissenschaften“ eröffnet. In: Süddeutsche Zeitung Nr. 29 (05.02.2001), S. 10.
- [FAZ 9.2.01] Frankfurter Allgemeine Zeitung (2001) (ohne Verfasser): Chirac lehnt therapeutisches Klonen ab. „Gefahr, die Fundamente der Zivilisation in Frage stellen“. In: Frankfurter Allgemeine Zeitung Nr. 34 (09.02.2001), S. 8.
- [FAZ 13.2.01a] Hanimann, Joseph (2000): Türhüter, sei wachsam! Vor dem Gesetz: Frankreich will Embryonenforschung erlauben. In: Frankfurter Allgemeine Zeitung Nr. 279 (30.11.2000), S. 51.
- [FAZ 13.2.01b] Haseltine, William (2001): Laß das Gen nur walten. So wird die Welt sich renovieren. In: Frankfurter Allgemeine Zeitung Nr. 37 (13.02.2001), S. 53.
- [FAZ 14.2.01] Geyer, Christian (2001): Helferrat. Schröder monopolisiert die Bioethik im Kanzleramt. In: Frankfurter Allgemeine Zeitung Nr. 38 (14.02.2001), S. 49.
- [FAZ 19.2.01] Hoppe, Jörg-Dietrich (2001): Wir wissen nicht weiter. Die Ärzteschaft delegiert ihre Fragen. In: Frankfurter Allgemeine Zeitung Nr. 42 (19.02.2001), S. 52.
- [FAZ 21.2.01] Hobom, Babara (2001): Nützliche Stammzellen aus dem Gehirn. Entwicklungspotential ebenbürtig zu Zellen aus Embryonen. In: Frankfurter Allgemeine Zeitung Nr. 44 (21.02.2001), S. N1.

- [FAZ 24.2.01] Hoerster, Norbert (2001): Nur wer die Sehnsucht kennt. Wann immer das Leben beginnen mag, das Lebensrecht beginnt erst mit der Fähigkeit, Wünsche zu haben. In: Frankfurter Allgemeine Zeitung Nr. 47 (24.02.2001), S. 46.
- [FAZ 27.2.01] Sahn, Stephan (2001): Sagt doch Zellhaufen, wenn ihr Zellhaufen meint. Wider eine fehlgeleitete Ethik des Heilens: Warum Ärzte die Forschung an Embryonen ablehnen müssen. In: Frankfurter Allgemeine Zeitung Nr. 49 (27.02.2001), S. 53.
- [FAZ 3.3.01] Engelhardt, Karlheinz (2001): Woher weiß Norbert Hoerster das so sicher? Leserbrief. In: Frankfurter Allgemeine Zeitung Nr. 53 (03.03.2001), S. 49.
- [FAZ 5.3.01] Geyer, Christian (2001): Ab durch die Mitte. Moral und Prozedur: Niemand will sagen, was flachfällt. In: Frankfurter Allgemeine Zeitung Nr. 54 (05.03.2001), S. 47.
- [FAZ 9.3.01] Frankfurter Allgemeine Zeitung (2001) (ohne Verfasser): „Der Mensch darf nicht alles, was er kann“. Die katholischen Bischöfe wägen Chancen und Risiken der Biomedizin. In: Frankfurter Allgemeine Zeitung Nr. 58 (09.03.2001), S. 5.
- [FAZ 10.3.01a] Flöhl, Rainer (2001): Ein Waterloo der Zelltransplantation. In: Frankfurter Allgemeine Zeitung Nr. 59 (10.03.2001), S. 9.
- [FAZ 10.3.01b] Riechelmann, Cord (2001): Dolly ist nicht debil. Der „Vater“ des Klonschafs, Ian Wilmut, sprach in der Charité. In: Frankfurter Allgemeine Zeitung Nr. 59 (10.03.2001), S. BS3.
- [FAZ 17.3.01a] Bahnert, Patrick (2001): Die Wende. Sein Nein ist endlich ein Nein: Kardinal Lehmanns Biopolitik. In: Frankfurter Allgemeine Zeitung Nr. 65 (17.03.2001), S. 41.
- [FAZ 17.3.01b] Kersting, Wolfgang (2001): Hantiert, wenn es euch frei macht. Menschenrechtsverletzung ist nicht Wertverletzung. In: Frankfurter Allgemeine Zeitung Nr. 65 (17.03.2001), S. 1.
- [FAZ 21.3.01] Spaemann, Robert (2001): Wer jemand ist, ist es immer. Es sind nicht die Gesetze, die den Beginn eines Menschenlebens bestimmen. In: Frankfurter Allgemeine Zeitung Nr. 68 (21.03.2001), S. 65.
- [FAZ 29.3.01a] Frankfurter Allgemeine Zeitung (2001) (ohne Verfasser): Stammzellen. Ein Brief an Präsident Bush. In: Frankfurter Allgemeine Zeitung Nr. 75 (29.03.2001), S. 54.
- [FAZ 29.3.01b] Jaenisch, Rudolf/Wilmut, Ian (2001): Klont keine Menschen! Die Tiere mahnen. In: Frankfurter Allgemeine Zeitung Nr. 75 (29.03.2001), S. 55.
- [FAZ 30.3.01] Heiduk, Stefan (2001): Bei schrankenloser Nutzung der Gentechnologie. Leserbrief. In: Frankfurter Allgemeine Zeitung Nr. 76 (30.03.2001), S. 57.
- [FAZ 31.3.01] Höffe, Otfried (2001): Rechtspflichten vor Tugendpflichten. Das Prinzip Menschenwürde im Zeitalter der Biomedizin. In: Frankfurter Allgemeine Zeitung Nr. 77 (31.03.2001), S. 11.
- [FAZ 3.4.01] Hense, Stefanie (2001): Eine Vielzahl von Stimmen. Die Union tut sich in der Ethikdebatte schwer. In: Frankfurter Allgemeine Zeitung Nr. 79 (03.04.2001), S. 6.
- [FAZ 4.4.01] Rüttgers, Jürgen (2001): Im Zweifel für das Leben. Wider den biopolitischen Pragmatismus. In: Frankfurter Allgemeine Zeitung Nr. 80 (04.04.2001), S. 51.
- [FAZ 5.4.01a] Frankfurter Allgemeine Zeitung (2001) (ohne Verfasser): Neuorientierung der biomedizinischen Forschung. In: Frankfurter Allgemeine Zeitung Nr. 81 (05.04.2001), S. 10.
- [FAZ 5.4.01b] Frankfurter Allgemeine Zeitung (2001) (ohne Verfasser): Tiefgekühlt. In: Frankfurter Allgemeine Zeitung Nr. 81 (05.04.2001), S. 16.
- [FAZ 7.4.01] Frankfurter Allgemeine Zeitung (2001) (ohne Verfasser): FDP befürwortet therapeutisches Klonen. In: Frankfurter Allgemeine Zeitung Nr. 83 (07.04.2001), S. 5.

- [FAZ 23.4.01] Schockenhoff, Eberhard (2001): Einspruch im Namen der Menschenwürde. In: Frankfurter Allgemeine Zeitung Nr. 94 (23.04.2001), S. 10.
- [FAZ 3.5.01a] Bahners, Christian u.a. (2001): Die Notwendigkeit der Abwägung stellt sich immer wieder neu. Ein Gespräch mit Bundeskanzler Gerhard Schröder. In: Frankfurter Allgemeine Zeitung Nr. 102 (03.05.2001), S. 56.
- [FAZ 3.5.01b] Schwägerl, Christian (2001): Den Embryo im Visier. Die Deutsche Forschungsgemeinschaft positioniert sich neu. In: Frankfurter Allgemeine Zeitung Nr. 102 (03.05.2001), S. 53.
- [FAZ 4.5.01a] Frankfurter Allgemeine Zeitung (2001) (ohne Verfasser): Gibt es „verwaiste“ Embryonen auch in Deutschland? In: Frankfurter Allgemeine Zeitung Nr. 103 (04.05.2001), S. 3.
- [FAZ 4.5.01b] Schwägerl, Christian (2001): Sie ist entfesselt. Die Liberalen suchen die Rolle der biopolitischen Avantgarde. In: Frankfurter Allgemeine Zeitung Nr. 103 (04.05.2001), S. 43.
- [FAZ 4.5.01c] Schwägerl, Christian (2001): Stammzellen haben sich zu den Glanzlichtern der medizinischen Forschung entwickelt. In: Frankfurter Allgemeine Zeitung Nr. 103 (04.05.2001), S. 3.
- [FAZ 5.5.01a] Frankfurter Allgemeine Zeitung (2001) (ohne Verfasser): Für die Forschung an menschlichen embryonalen Stammzellen. In: Frankfurter Allgemeine Zeitung Nr. 104 (05.05.2001), S. 2.
- [FAZ 5.5.01b] Frankfurter Allgemeine Zeitung (2001) (ohne Verfasser): Zurückhaltung und Kritik. In: Frankfurter Allgemeine Zeitung Nr. 104 (05.05.2001), S. 2.
- [FAZ 5.5.01c] Frankfurter Allgemeine Zeitung (2001) (ohne Verfasser): Brüste muß weiter warten. In: Frankfurter Allgemeine Zeitung Nr. 104 (05.05.2001), S. 2.
- [FAZ 5.5.01d] Müller-Jung, Joachim/Schwägerl, Christian (2001): „Wir wollen keine Menschen züchten“. Der Präsident der Deutschen Forschungsgemeinschaft rechtfertigt den Kurswechsel in der Embryoforschung. In: Frankfurter Allgemeine Zeitung Nr. 104 (05.05.2001), S. 43.
- [FAZ 5.5.01e] Müller-Jung, Joachim (2001): In der Ethikfalle. In: Frankfurter Allgemeine Zeitung Nr. 104, S. 12.
- [FAZ 7.5.01a] Geyer, Christian (2001): Rubikon der nächste. In: Frankfurter Allgemeine Zeitung Nr. 105 (07.05.2001), S. 47.
- [FAZ 7.5.01b] Riedel, Ulrike (2001): Wer die Ethik nicht fühlen will, muß das Recht hören. In: Frankfurter Allgemeine Zeitung Nr. 105 (07.05.2001), S. 50.
- [FAZ 7.5.01c] Frankfurter Allgemeine Zeitung (2001) (ohne Verfasser): Winnacker: Wir wollen keine Menschen züchten. In: Frankfurter Allgemeine Zeitung Nr. 194 (05.05.2001), S. 1.
- [FAZ 8.5.01a] Frankfurter Allgemeine Zeitung (2001) (ohne Verfasser): Kontroverse in der SPD-Führung über den biopolitischen Kurs der Partei. In: Frankfurter Allgemeine Zeitung Nr. 106 (08.05.2001), S. 1.
- [FAZ 8.5.01b] Geyer, Christian (2001): Schutz ohne Stufen. Die Justizministerin markiert Grenzen für die Biopolitik. In: Frankfurter Allgemeine Zeitung Nr. 106 (08.05.2001), S. 49.
- [FAZ 9.5.01a] Frankfurter Allgemeine Zeitung (2001) (ohne Verfasser): Däubler-Gmelin bleibt hart. In: Frankfurter Allgemeine Zeitung Nr. 107 (09.05.2001), S. 4.
- [FAZ 9.5.01b] Geyer, Christian (2001): Über die Hintertreppe. In: Frankfurter Allgemeine Zeitung Nr. 107 (09.05.2001), S. 47.
- [FAZ 11.5.01a] Frankfurter Allgemeine Zeitung (2001) (ohne Verfasser): Die Zellen unserer Embryonen können Kranke heilen. In: Frankfurter Allgemeine Zeitung Nr. 109 (11.05.2001), S. 53.
- [FAZ 11.5.01b] Müller-Jung, Joachim (2001): Bio-Dynamisch. Wer findet den ethischen Korridor für die Embryonenforschung? In: Frankfurter Allgemeine Zeitung Nr. 109 (11.05.2001), S. 47.

- [FAZ 12.5.01] Geyer, Christian (2001): Pflöcke. Presseschau: Die Öffentlichkeit läßt sich nicht jeden Rat bieten. In: Frankfurter Allgemeine Zeitung Nr. 110 (12.05.2001), S. 41.
- [FAZ 14.5.01a] Frankfurter Allgemeine Zeitung (2001) (ohne Verfasser): Bulmahn ändert Position zu Gentechnik. Ministerin will Forschung an embryonalen Stammzellen zulassen. In: Frankfurter Allgemeine Zeitung Nr. 111 (14.05.2001), S. 2.
- [FAZ 14.5.01b] Frankfurter Allgemeine Zeitung (2001) (ohne Verfasser): Salamikonsens. Grüne gegen PID und Embryonenforschung. In: Frankfurter Allgemeine Zeitung Nr. 111 (14.05.2001), S. 49.
- [FAZ 14.5.01c] Müller, Reinhard (2001): Abstrakter Lebensschutz. Was folgt aus der Rechtsprechung zur Abtreibung? In: Frankfurter Allgemeine Zeitung Nr. 111 (14.05.2001), S. 16.
- [FAZ 14.5.01d] Müller-Jung, Joachim (2001): Kein Menschenverächter. Die Motive der britischen Embryonenforscher. Ein Gespräch mit dem schottischen Wissenschaftler Austin Smith. In: Frankfurter Allgemeine Zeitung Nr. 111 (14.05.2001), S. 51.
- [FAZ 15.5.01a] Frankfurter Allgemeine Zeitung (2001) (ohne Verfasser): Kritik aus dem Bundestag. In: Frankfurter Allgemeine Zeitung Nr. 112 (15.05.2001), S. 4.
- [FAZ 15.5.01b] Schwägerl, Christian (2001): Alles Quark. Die Enquete-Kommission Biomedizin zieht Bilanz. In: Frankfurter Allgemeine Zeitung Nr. 112 (15.05.2001), S.52.
- [FAZ 17.5.01] Riedel, Ulrike (2001): Der erschlichene Embryo. Forscher, stellt euch nicht dumm: Mit „Rechtsphilosophie light“ läßt die Menschenwürde nicht knacken. In: Frankfurter Allgemeine Zeitung Nr. 114 (17.05.2001), S. 51.
- [FAZ 18.5.01a] Frankfurter Allgemeine Zeitung (2001) (ohne Verfasser): Struck kritisiert Grünen-Papier. In: Frankfurter Allgemeine Zeitung Nr. 115 (18.05.2001), S. 2.
- [FAZ 18.5.01b] Schwägerl, Christian (2001): Kein Punkt für Schröder. In: Frankfurter Allgemeine Zeitung Nr. 115 (18.05.2001), S. 49.
- [FAZ 19.5.01a] Frankfurter Allgemeine Zeitung (2001) (ohne Verfasser): Maßstab. In: Frankfurter Allgemeine Zeitung Nr. 116 (19.05.2001), S. 1.
- [FAZ 19.5.01b] Frankfurter Allgemeine Zeitung (2001) (ohne Verfasser): Rau sieht in der Biopolitik die Bundesregierung auf Abwegen. In: Frankfurter Allgemeine Zeitung Nr. 116 (19.05.2001), S. 1.
- [FAZ 19.5.01c] Geyer, Christian (2001): Die Rede vom 18. Mai. Johannes Rau warnt Schröder und blamiert die CDU. In: Frankfurter Allgemeine Zeitung Nr. 116 (19.05.2001), S. 41.
- [FAZ 21.5.01a] Bahners, Patrick (2001): Was nun? Nach der Rede vom 18. Mai: Aberwitz und Unmut der CDU. In: Frankfurter Allgemeine Zeitung Nr. 117 (21.05.2001), S. 47.
- [FAZ 21.5.01b] Schäuble, Wolfgang (2001): Vergeßt die Mutter Nicht. Mein Ja zur Embryonenforschung. In: Frankfurter Allgemeine Zeitung Nr. 117 (21.05.2001), S. 49.
- [FAZ 22.5.01a] Bahners, Patrick u.a. (2001): Die Würde des Embryos ist unbezweifelbar. Interview mit Herta Däubler-Gmelin. In: Frankfurter Allgemeine Zeitung Nr. 118 (22.05.2001), S. 52.
- [FAZ 22.5.01b] Frankfurter Allgemeine Zeitung (2001) (ohne Verfasser): SPD unentschieden in der Biopolitik-Debatte. In: Frankfurter Allgemeine Zeitung Nr. 118 (22.05.2001), S. 1.
- [FAZ 22.5.01c] Schirrmacher, Frank (2001): Privatschule des Lebens. Der Embryo im Zeitalter Gerhard Schröders. In: Frankfurter Allgemeine Zeitung Nr. 118 (22.05.2001), S. 49.
- [FAZ 23.5.01] Frankfurter Allgemeine Zeitung (2001) (ohne Verfasser): EKD für uneingeschränkten Embryonenschutz. In: Frankfurter Allgemeine Zeitung Nr. 119 (23.05.2001), S. 2.
- [FAZ 25.5.01a] Frankfurter Allgemeine Zeitung (2001) (ohne Verfasser): Ärztetag gegen Embryonenforschung. In: Frankfurter Allgemeine Zeitung Nr. 120 (25.05.2001), S. 2.

- [FAZ 25.5.01b] Frankfurter Allgemeine Zeitung (2001) (ohne Verfasser): Rüttgers: Präimplantationsdiagnostik nicht grundsätzlich ablehnen. In: Frankfurter Allgemeine Zeitung Nr. 120 (25.05.2001), S. 1.
- [FAZ 26.5.01a] Frankfurter Allgemeine Zeitung (2001) (ohne Verfasser): Koch widerspricht Rüttgers in der Genpolitik. In: Frankfurter Allgemeine Zeitung Nr. 121 (26.05.2001), S. 1.
- [FAZ 26.5.01b] Schavan, Annette (2001): Rückkehr des Politischen. Raus „Berliner Rede“ war ein überfälliger Widerspruch. In: Frankfurter Allgemeine Zeitung Nr. 121 (26.05.2001), S. 8.
- [FAZ 28.5.01a] Frankfurter Allgemeine Zeitung (2001) (ohne Verfasser): „Schröder soll Geschichte sein lassen“. In: Frankfurter Allgemeine Zeitung Nr. 122 (28.05.2001), S. 1.
- [FAZ 28.5.01b] Hefty, Georg (2001): Die Menschenwürde ist nicht antastbar – aber auslegbar. In: Frankfurter Allgemeine Zeitung Nr. 122 (28.05.2001), S. 1.
- [FAZ 29.5.01a] Frankfurter Allgemeine Zeitung (2001) (ohne Verfasser): Iudex non calculat. In: Frankfurter Allgemeine Zeitung Nr. 123 (29.05.2001), S. 49.
- [FAZ 29.5.01b] Frankfurter Allgemeine Zeitung (2001) (ohne Verfasser): CDU-Führung beschließt Rüttgers-Papier. In: Frankfurter allgemeine Zeitung Nr. 123 (29.05.2001), S. 1.
- [FAZ 29.5.01c] Frankfurter allgemeine Zeitung (2001) (ohne Verfasser): „Sehr viel weniger verwaiste Embryonen als bisher vermutet“. In: Frankfurter Allgemeine Zeitung Nr. 123 (29.05.2001), S. 2.
- [FAZ 29.5.01d] Wolfrum, Rüdiger (2001): Unser Recht auf ein Höchstmaß an Gesundheit. In: Frankfurter Allgemeine Zeitung Nr. 123 (29.05.2001), S. 53.
- [FAZ 30.5.01] Stark, Christian (2001): Hört auf, unser Grundgesetz zerreden zu wollen. In: Frankfurter Allgemeine Zeitung Nr. 124 (30.05.2001), S. 55.
- [FAZ 31.5.01a] Frankfurter Allgemeine Zeitung (2001) (ohne Verfasser): Cardion setzt auf Stammzellen. In: Frankfurter Allgemeine Zeitung Nr. 125 (31.05.2001), S. 20.
- [FAZ 31.5.01b] Frankfurter Allgemeine Zeitung (2001) (ohne Verfasser): Die Gentechnik-Debatte: Wirtschaft versus Ethik? In: Frankfurter Allgemeine Zeitung Nr. 125 (31.05.2001), S. 20.
- [FAZ 31.5.01c] Müller-Jung, Joachim (2001): Bioingenieure im Rausch der Geschwindigkeit. In: Frankfurter Allgemeine Zeitung Nr. 125 (31.05.2001), S. 21.
- [FAZ 31.5.01d] Horn, Karen (2001): Nur solche Geschäfte machen, dass man nachts ruhig schlafen kann. Wirtschaft und Ethik sind keine Gegensätze. Der zukunfts offene Gesellschaftsvertrag. In: Frankfurter Allgemeine Zeitung Nr. 125 (31.05.2001), S. 21.
- [FAZ 31.5.01e] Lindner, Roland (2001): „Das ist doch paradox.“ Fragen an Dagmar Schipanski. In: Frankfurter Allgemeine Zeitung Nr. 125 (31.05.2001), S. 21.
- [FAZ 1.6.01a] Bahners, Patrick (2001): Wir sehen weiter. In: Frankfurter Allgemeine Zeitung Nr. 126 (01.06.2001), S. 45.
- [FAZ 1.6.01b] Fischer, Andrea (2001): Wir sind für Gentechnik. Aber nicht auf Kosten des Embryos. In: Frankfurter Allgemeine Zeitung Nr. 126 (01.06.2001), S. 47.
- [FAZ 1.6.01c] Frankfurter Allgemeine Zeitung (2001) (ohne Verfasser): Daß es Grenzen geben muß, ist unumstritten. In: Frankfurter Allgemeine Zeitung Nr. 126 (01.06.2001), S. 3.
- [FAZ 1.6.01d] Frankfurter Allgemeine Zeitung (2001) (ohne Verfasser): Clement will Bonner Stammzellen-Forscher unterstützen. In: Frankfurter Allgemeine Zeitung Nr. 126 (01.06.2001), S. 2.
- [FAZ 1.6.01e] Hefty, Paul Georg (2001): Der Preis der Heilungsversprechen. In: Frankfurter Allgemeine Zeitung Nr. 126 (01.06.2001), S. 1.

- [FAZ 5.6.01] Schilder, Peter (2001): Schritt halten und Zeit gewinnen. In: Frankfurter Allgemeine Zeitung Nr. 128 (05.06.2001), S. 4.
- [FAZ 11.6.01] Frankfurter Allgemeine Zeitung (2001) (ohne Verfasser): Stammzellen einführen oder in Deutschland herstellen? In: Frankfurter Allgemeine Zeitung Nr. 133 (11.06.2001), S. 6.
- [FAZ 12.6.01] Frankfurter Allgemeine Zeitung (2001) (ohne Verfasser): Bischöfe appellieren an Clement. In: Frankfurter Allgemeine Zeitung Nr. 134 (12.06.2001), S. 5.
- [FAZ 18.6.01] Frankfurter Allgemeine Zeitung (2001) (ohne Verfasser): Clement streitet für den Stammzellenimport. In: Frankfurter Allgemeine Zeitung Nr. 138 (18.06.2001), S. 4.
- [FAZ 26.6.01] Frankfurter Allgemeine Zeitung (2001) (ohne Verfasser): „Embryonenschutzgesetz nicht ändern“. SPD akzeptiert Stammzellen-Import. In: Frankfurter Allgemeine Zeitung Nr. 145 (26.06.2001), S. 5.
- [FAZ 27.6.01a] Frankfurter Allgemeine Zeitung (2001) (ohne Verfasser): Hoffnungsträger. Plädoyers für Stammzellenforschung. In: Frankfurter Allgemeine Zeitung Nr. 146 (27.06.2001), S. 43.
- [FAZ 27.6.01b] Frankfurter Allgemeine Zeitung (2001) (ohne Verfasser): SPD und Grüne uneins über Unions-Antrag zur Gentechnik. In: Frankfurter Allgemeine Zeitung Nr. 146 (27.06.2001), S. 4.
- [FAZ 28.6.01] Schwägerl, Christian (2001): Kieler Wissenschaftler erhält embryonale Stammzellen aus Australien. In: Frankfurter Allgemeine Zeitung Nr. 147 (28.06.2001), S. 1.
- [FAZ 29.6.01a] Bartram, Claus R. (2001): Warum auf den Ethikrat warten? In: Frankfurter Allgemeine Zeitung Nr. 148 (29.06.2001), S. 46.
- [FAZ 29.6.01b] Frankfurter Allgemeine Zeitung (2001) (ohne Verfasser): Seehofer und Koch für Stammzellen-Forschung. In: Frankfurter Allgemeine Zeitung Nr. 148 (29.06.2001), S. 1.
- [FAZ 29.6.01c] Schwägerl, Christian (2001): Wunderbare embryonale Stammzellen und hohe Kompetenz. In: Frankfurter Allgemeine Zeitung Nr. 148 (29.06.2001), S. 148.
- [FAZ 30.6.01a] Adam, Konrad (2000): Fortschritte und Niederlagen. Das Europäische Patentamt hat einen Fehler gemacht. Einen typischen allerdings. In: Frankfurter Allgemeine Zeitung Nr. 45 (23.02.2000), S. 51.
- [FAZ 30.6.01b] Adrian, Michael (2001): Stimmrecht. Habermas läßt den Embryo am Diskurs teilnehmen. In: Frankfurter Allgemeine Zeitung Nr. 149 (30.06.2001), S. 43.
- [FAZ 30.6.01c] Frankfurter Allgemeine Zeitung (2001) (ohne Verfasser): Tierse warnt vor zu großer Eile. In: Frankfurter Allgemeine Zeitung Nr. 149 (30.06.2001), S. 4.
- [FAZ 30.6.01d] Frankfurter Allgemeine Zeitung (2001) (ohne Verfasser): Konsequentes Handeln. In: Frankfurter Allgemeine Zeitung Nr. 149 (30.06.2001), S. 12.
- [FAZ 30.6.01e] Schwägerl, Christian (2001): Zurückgedrückt. In: Frankfurter Allgemeine Zeitung Nr. 149 (30.06.2001), S. 4.
- [FAZ 2.7.01] Bahners, Patrick (2001): Bürger Embryo. Habermas kontra Markl: Wer ist ein Mensch wie du und ich? In: Frankfurter Allgemeine Zeitung Nr. 150 (02.07.2001), S. 43.
- [FAZ 5.7.01] Flöhl, Rainer (2001): Embryonale Stammzellen – ein Mythos. In: Frankfurter Allgemeine Zeitung Nr. 153 (05.07.2001), S. 1.
- [FAZ 6.7.01a] Frankfurter Allgemeine Zeitung (2001) (ohne Verfasser): Koalition lehnt Moratorium ab. In: Frankfurter Allgemeine Zeitung Nr. 154 (06.07.2001), S. 2.
- [FAZ 6.7.01b] Frankfurter Allgemeine Zeitung (2001) (ohne Verfasser): Überraschungseier. In: Frankfurter Allgemeine Zeitung Nr. 154 (06.07.2001), S. 154.

- [FAZ 6.7.01c] Frankfurter Allgemeine Zeitung (2001) (ohne Verfasser): Bürgerschutz. In: Frankfurter Allgemeine Zeitung Nr. 154 (06.07.2001), S. 12.
- [FAZ 7.7.01a] Frankfurter Allgemeine Zeitung (2001) (ohne Verfasser): Wertegemeinschaft. In: Frankfurter Allgemeine Zeitung Nr. 155 (07.07.2001), S. 41.
- [FAZ 7.7.01b] Sahm, Stephan (2001): Er kann auch anders. In: Frankfurter Allgemeine Zeitung Nr. 155 (07.07.2001), S. 43.
- [FAZ 9.7.01a] Frankfurter allgemeine Zeitung (2001) (ohne Verfasser): Bonner Wissenschaftler gegen Stammzellforschung. In: Frankfurter Allgemeine Zeitung Nr. 156 (09.07.2001), S. 1.
- [FAZ 9.7.01b] Mejias, Jordan (2001): Der verlorene Sohn. In: Frankfurter Allgemeine Zeitung Nr. 156 (09.07.2001), S. 43.
- [FAZ 10.7.01a] Frankfurter Allgemeine Zeitung (2001) (ohne Verfasser): Simitis für in ganz Europa geltende Regeln beim Import von Stammzellen. In: Frankfurter Allgemeine Zeitung Nr. 157 (10.07.2001), S. 2.
- [FAZ 10.7.01b] Höfling, Wolfgang (2001): Zygote – Mensch – Person. In: Frankfurter Allgemeine Zeitung Nr. 157 (10.07.2001), S. 8.
- [FAZ 11.7.01] Frankfurter Allgemeine Zeitung (2001) (ohne Verfasser): Streit. Bonner Forscher über Embryonalprojekt. In: Frankfurter Allgemeine Zeitung Nr. 158 (11.07.2001), S. 4.
- [FAZ 16.7.01] Frankfurter Allgemeine Zeitung (2001) (ohne Verfasser): Lebensschutz nicht abgestuft verstehen. In: Frankfurter Allgemeine Zeitung Nr. 162 (16.07.2001), S. 4.
- [FAZ 17.7.01a] Bahnen, Achim (2001): Bis hierhin. In: Frankfurter Allgemeine Zeitung Nr. 163 (17.07.2001), S. 41.
- [FAZ 17.7.01b] Frankfurter Allgemeine Zeitung (2001) (ohne Verfasser): Patientenkclone. In: Frankfurter Allgemeine Zeitung Nr. 163 (17.07.2001), S. 46.
- [FAZ 19.7.01] Müller-Jung, Joachim, Schwägerl, Christian (2001): Ich lese jetzt Huxley. In: Frankfurter Allgemeine Zeitung Nr. 165 (19.07.2001), S. 41.
- [FAZ 20.7.01] Wissner, Josef (2001): Einzigartig und komplett. In: Frankfurter Allgemeine Zeitung Nr. 166 (20.07.2001), S. 44.
- [FAZ 21.7.01a] Frankfurter Allgemeine Zeitung (2001) (ohne Verfasser): Stammzellen ins Herz transplantiert. In: Frankfurter Allgemeine Zeitung Nr. 167 (21.07.2001), S. 9.
- [FAZ 21.7.01b] Frankfurter Allgemeine Zeitung (2001) (ohne Verfasser): Theologen warnen vor Hast in der Stammzellen-Diskussion. In: Frankfurter Allgemeine Zeitung Nr. 167 (21.07.2001), S. 4.
- [FAZ 23.7.01] Hoerster, Norbert (2001): Hat der Embryo wirklich Interesse am Leben? In: Frankfurter Allgemeine Zeitung Nr. 168 (23.07.2001), S. 44.
- [FAZ 25.7.01] Frankfurter Allgemeine Zeitung (2001) (ohne Verfasser): Wachsende Kulturen. In: Frankfurter Allgemeine Zeitung Nr. 170 (25.07.2001), S. 41.
- [FAZ 27.7.01] Frankfurter Allgemeine Zeitung (2001) (ohne Verfasser): Gehirn-Stammzellen auf Wanderschaft. In: Frankfurter Allgemeine Zeitung Nr. 172 (27.07.2001), S. 41.
- [FAZ 28.7.01] Geyer, Christian (2001): Halbwissen. In: Frankfurter Allgemeine Zeitung Nr. 173 (28.07.2001), S. 41.
- [FAZ 1.8.01] Hobom, Barbara (2001): Jede Zelle eine potentielle Stammzelle? In: Frankfurter Allgemeine Zeitung Nr. 176 (01.08.2001), S. N1.

- [FAZ 3.8.01a] Bahnen, Achim (2001): Klonen böse, alles gut. Faule Freude – Deutschland beklatscht Amerika etwas zu laut. In: Frankfurter Allgemeine Zeitung Nr. 178 (03.08.2001), S.39.
- [FAZ 3.8.01b] Frankfurter Allgemeine Zeitung (2001) (ohne Verfasser): Bulmahn will Klon-Verbot international durchsetzen. In: Frankfurter Allgemeine Zeitung Nr. 178 (03.08.2001), S. 1.
- [FAZ 3.8.01c] Frankfurter Allgemeine Zeitung (2001) (ohne Verfasser): Aus Stammzellen Herzzellen gezüchtet. In: Frankfurter Allgemeine Zeitung Nr. 178 (03.08.2001), S. 9.
- [FAZ 3.8.01d] Rademacher, Horst (2001): Mit anderen Argumenten gegen das Klonen von Menschen. In: Frankfurter Allgemeine Zeitung Nr. 178 (03.08.2001), S. 6.
- [FAZ 4.8.01a] Bahnen, Achim (2001): Blackout. Plötzlich hat Detlev Ganten den Stufenplan der DFG vergessen. In: Frankfurter Allgemeine Zeitung Nr. 186 (04.08.2001), S. 45.
- [FAZ 4.8.01b] Zielke, Anne (2001): Großer Leib, wir loben dich. Die Biopolitik als Vorspiel einer Religion der Zukunft. In: Frankfurter Allgemeine Zeitung Nr. 179 (04.08.2001), S. 44.
- [FAZ 7.8.01] Frankfurter Allgemeine Zeitung (2001) (ohne Verfasser): Einspruch. Bonner Mediziner gegen Stammzellprojekt. In: Frankfurter Allgemeine Zeitung Nr. 181 (07.08.2001), S. 42.
- [FAZ 8.8.01] Schmoll, Heike (2001): Sackgasse der bioethischen Debatte. In: Frankfurter Allgemeine Zeitung Nr. 182 (08.08.2001), S. 1.
- [FAZ 9.8.01] Huber, Wolfgang (2001): Wir stehen nicht erst am Anfang des Diskurses. In: Frankfurter Allgemeine Zeitung Nr. 183 (09.08.2001), S. 44.
- [FAZ 10.8.01a] Albrecht, Ernst (2001): Am Scheideweg. Zwischen Sittlichkeit und Interesse: Die Biotechnik und die Krise der Ethik. In: Frankfurter Allgemeine Zeitung Nr. 184 (10.08.2001), S. 41.
- [FAZ 10.8.01b] Frankfurter Allgemeine Zeitung (2001): Freunde des Klonens. Zum Beispiel im Stifterverband. In: Frankfurter Allgemeine Zeitung Nr. 184 (10.08.2001), S. 41.
- [FAZ 11.8.01a] Bahnners, Patrick (2001): Unsere kleine Farm. Moral versteht sich am Ende von selbst: Was der Präsident seinen Landsleuten gesagt hat. In: Frankfurter Allgemeine Zeitung Nr. 185 (11.08.2001), S. 41.
- [FAZ 11.8.01b] Frankfurter Allgemeine Zeitung (2001) (ohne Verfasser): Bush will Stammzellforschung begrenzt fördern. In: Frankfurter Allgemeine Zeitung Nr. 185 (11.08.2001), S. 1.
- [FAZ 11.8.01c] Frankfurter Allgemeine Zeitung (2001) (ohne Verfasser): Clement sieht sich bestätigt. In: Frankfurter Allgemeine Zeitung Nr. 185 (11.08.2001), S. 2.
- [FAZ 11.8.01d] Schwägerl, Christian (2001): Wohin weht der Rückenwind? Bushs Entscheidung ist ein Votum für das deutsche Embryonenschutzgesetz. In: Frankfurter Allgemeine Zeitung Nr. 185 (11.08.2001), S. 41.
- [FAZ 13.8.01a] Frankfurter Allgemeine Zeitung (2001) (ohne Verfasser): Es gibt eine Grenze. Bush erläutert seine Entscheidung. In: Frankfurter Allgemeine Zeitung Nr. 186 (13.08.2001), S. 45.
- [FAZ 13.8.01b] Schwägerl, Christian (2001): Ja, wo lagern sie denn? Sechzig Linien: Die wahre Überraschung in der Bush-Rede. In: Frankfurter Allgemeine Zeitung Nr. 186 (13.08.2001), S. 45.
- [FAZ 17.8.01a] Callahan, Daniel (2001): Es gibt nur einen Imperativ. Wer Werte will, muß Embryonen schützen. In: Frankfurter Allgemeine Zeitung Nr. 190 (17.08.2001), S. 39.
- [FAZ 17.8.01b] Kempermann, Gerd (2001): Der Traum neuer Zellen für neue Menschen. Den angeblich zwingenden Gründen für die Anwendung embryonaler Stammzellen erwachsen mehr und mehr wissenschaftliche Gegenargumente. In: Frankfurter Allgemeine Zeitung Nr. 190 (17.08.2001), S. 42.

- [FAZ 17.8.01c] Rademacher, Horst (2001): Zäsur in der Wissenschaft. Auch ein Klonverbot kann den Geist nicht mehr in die Flasche zurückstopfen. In: Frankfurter Allgemeine Zeitung Nr. 190 (17.08.2001), S. 12.
- [FAZ 18.8.01a] Frankfurter Allgemeine Zeitung (2001) (ohne Verfasser): Interessenkonflikte? Schröder ignoriert Anfrage zum Ethikrat. In: Frankfurter Allgemeine Zeitung Nr. 191 (18.08.2001), S. 41.
- [FAZ 18.8.01b] Hefty, Georg (2001): Der Preis der Heilungsversprechen. In: Frankfurter Allgemeine Zeitung Nr. 126 (01.06.2001), S. 1.
- [FAZ 25.8.01a] Frankfurter Allgemeine Zeitung (2001) (ohne Verfasser): Erfolgreiche Behandlung mit adulten Stammzellen. In: Frankfurter Allgemeine Zeitung Nr. 197 (25.08.2001), S. 1.
- [FAZ 25.8.01b] Frankfurter Allgemeine Zeitung (2001) (ohne Verfasser): Ich sehe eine moralische Pflicht zum Embryoverbrauch. Interview mit Harold Varmus. In: Frankfurter Allgemeine Zeitung Nr. 197 (25.08.2001), S. 43.
- [FAZ 25.8.01c] Schwägerl, Christian (2001): Heilsam. Willkommene Stammzellen aus Clements Vorhof. In: Frankfurter Allgemeine Zeitung Nr. 197 (25.08.2001), S. 41.
- [FAZ 27.8.01] Schwägerl, Christian (2001): Pool für Embryonen. Ein für allemal und international: Der Zugriff auf Stammzellen. In: Frankfurter Allgemeine Zeitung Nr. 198 (27.08.2001), S. 41.
- [FAZ 28.8.01] Frankfurter Allgemeine Zeitung (2001) (ohne Verfasser): Herkunft von Zelllinien veröffentlicht. In: Frankfurter Allgemeine Zeitung Nr. 199 (28.08.2001), S. 2.
- [FAZ 30.8.01] Gould, Stephen Jay (2001): Baers Gesetz. Der Embryo kann alles. In: Frankfurter Allgemeine Zeitung Nr. 201 (30.08.2001), S. 41.
- [FAZ 1.9.01] Frankfurter Allgemeine Zeitung (2001) (ohne Verfasser): Selbstverpflichtung bei Stammzellimport. In: Frankfurter Allgemeine Zeitung Nr. 203 (01.09.2001), S. 2.
- [FAZ 4.9.01a] Frankfurter Allgemeine Zeitung (2001) (ohne Verfasser): Blutzellen aus Stammzellen. Hilfe im Kampf gegen Leukämie? In: Frankfurter Allgemeine Zeitung Nr. 205 (04.09.2001), S. 13.
- [FAZ 4.9.01b] Frankfurter Allgemeine Zeitung (2001) (ohne Verfasser): Eine Quelle für Blut. Embryonale Stammzellen umgewandelt. In: Frankfurter Allgemeine Zeitung Nr. 205 (04.09.2001), S. 48.
- [FAZ 5.9.01a] Frankfurter Allgemeine Zeitung (2001) (ohne Verfasser): Gezielte Suche nach Stammzellen. In: Frankfurter Allgemeine Zeitung Nr. 206 (05.09.2001), S. N1.
- [FAZ 5.9.01b] Schwägerl, Christian (2001): Der heiße Herbst der Biopolitik. Weitreichende Entscheidungen müssen getroffen werden: Zur Stammzellforschung, Präimplantationsdiagnostik, grünen Gentechnik und über Biopatente. In: Frankfurter Allgemeine Zeitung Nr. 206 (05.09.2001), S. 5.
- [FAZ 7.9.01] Herzog, Volker (2001): Missbrauch der Medizin. Die Märchen der Embryoüberbraucher. In: Frankfurter Allgemeine Zeitung Nr. 208 (07.09.2001), S. 51.
- [FAZ 8.9.01] Gallmeier, Walter (2001): Knochenmark gegen Herzinfarkt? In: Frankfurter Allgemeine Zeitung Nr. 209 (08.09.2001), S. 53.
- [FAZ 13.9.01a] Frankfurter Allgemeine Zeitung (2001) (ohne Verfasser): Stammzellverschleiß. Wissenschaftsakademie kontert Bush. In: Frankfurter Allgemeine Zeitung Nr. 213 (13.09.2001), S. 50.
- [FAZ 13.9.01b] Frankfurter Allgemeine Zeitung (2001) (ohne Verfasser): Abgelaufen. In: Frankfurter Allgemeine Zeitung Nr. 213 (13.09.2001), S. 16.
- [FAZ 26.9.01] Frankfurter Allgemeine Zeitung (2001) (ohne Verfasser): Stammzellen in Leber lokalisiert. Eiförmige Zellen mit großem Potential. Keine toxischen Schäden. In: Frankfurter Allgemeine Zeitung Nr. 224 (26.09.2001), S. N1.

- [FAZ 27.9.01a] Frankfurter Allgemeine Zeitung (2001) (ohne Verfasser): Dritte Sitzung des Nationalen Ethikrats. In: Frankfurter Allgemeine Zeitung Nr. 225 (27.09.2001), S. 5.
- [FAZ 27.9.01b] Müller-Jung, Joachim (2001): Klonieren für den Jungbrunnen. Auf zu neuen Ufern: In der Klonfabrik ACT herrscht Hochbetrieb. In: Frankfurter Allgemeine Zeitung Nr. 225 (27.09.2001), S. 48.
- [FAZ 27.9.01c] Schwägerl, Christian (2001): Augen auf und rein ins Gewimmel. Der Nationale Ethikrat sucht Orientierung im Stammzellkonflikt. In: Frankfurter Allgemeine Zeitung Nr. 225 (27.09.2001), S. 49.
- [FAZ 27.9.01d] Schwägerl, Christian (2001): Wir erforschen die Beseitigung ethischer Bauchschmerzen. Eine Tagung über Stammzellen und Klone setzt auf die Evolution. In: Frankfurter Allgemeine Zeitung Nr. 225 (27.09.2001), S. BS2.
- [FAZ 19.10.01a] Frankfurter Allgemeine Zeitung (2001) (ohne Verfasser): Nationaler Ethikrat kommt voran. In: Frankfurter Allgemeine Zeitung Nr. 243 (19.10.2001), S. 5.
- [FAZ 19.10.01b] Frankfurter Allgemeine Zeitung (2001) (ohne Verfasser): Entscheidung über Stammzellen verzögert. In: Frankfurter Allgemeine Zeitung Nr. 243 (19.10.2001), S. 5.
- [FAZ 20.10.01] Schwägerl, Christian (2001): Strohhalme für die Ethik. Embryonen, die keine sind: Die Forschung hat neue Ideen. In: Frankfurter Allgemeine Zeitung Nr. 244 (20.10.2001), S. 41.
- [FAZ 23.10.01] Frankfurter Allgemeine Zeitung (2001) (ohne Verfasser): Potente Hautzellen. Rückverwandlung in Stammzellen. In: Frankfurter Allgemeine Zeitung Nr. 246 (23.10.2001), S. 50.
- [FAZ 24.10.01] Frankfurter Allgemeine Zeitung (2001) (ohne Verfasser): Orakel des Ethikrats. Ist der Stammzell-Import beschlossen? In: Frankfurter Allgemeine Zeitung Nr. 247 (24.10.2001), S. 54.
- [FAZ 27.10.01] Frankfurter Allgemeine Zeitung (2001) (ohne Verfasser): Von Renesse fordert Zeit für Stammzellentscheidung. In: Frankfurter Allgemeine Zeitung Nr. 250 (27.10.2001), S. 4.
- [FAZ 31.10.01a] Frankfurter Allgemeine Zeitung (2001) (ohne Verfasser): Appelle an die DFG werden lauter. Der Bundestag braucht Zeit für Entscheidung über Stammzellimport. In: Frankfurter Allgemeine Zeitung Nr. 253 (31.10.2001), S. 5.
- [FAZ 31.10.01b] Frankfurter Allgemeine Zeitung (2001) (ohne Verfasser): Teil des Problems. In: Frankfurter Allgemeine Zeitung Nr. 253 (31.10.2001), S. 1.
- [FAZ 1.11.01a] Becker, Jörg (2001): Dumm und frech, das passt zusammen. Ich trete aus: Was die DFG für Ethik hält, ist so ignorant wie gefährlich. Offener Brief an den Präsidenten der Deutschen Forschungsgemeinschaft. In: Frankfurter Allgemeine Zeitung Nr. 254 (01.11.2001), S. 46.
- [FAZ 1.11.01b] Stabenow, Michael (2001): Salamtaktik gegen Fundamentalismus. Die Debatte des EU-Parlaments über Klonen. In: Frankfurter Allgemeine Zeitung Nr. 280 (01.11.2001), S. 5.
- [FAZ 8.11.01a] Frankfurter Allgemeine Zeitung (2001) (ohne Verfasser): Neuer Zeitplan zur Stammzellen-Entscheidung. In: Frankfurter Allgemeine Zeitung Nr. 260 (08.11.2001), S. 4.
- [FAZ 8.11.01b] Schwägerl, Christian (2001): Wir können alles. Ohne Embryonenopfer: Konrad Beyreuther warnt die Kollegen. In: Frankfurter Allgemeine Zeitung Nr. 260 (08.11.2001), S. 49.
- [FAZ 9.11.01] Frankfurter Allgemeine Zeitung (2001) (ohne Verfasser): Kritik an Clement in Stammzelldiskussion. In: Frankfurter Allgemeine Zeitung Nr. 261 (09.11.2001), S. 5.
- [FAZ 10.11.01a] Frankfurter Allgemeine Zeitung (2001) (ohne Verfasser): SPD-Führung für Nutzung überzähliger Embryonen. In: Frankfurter Allgemeine Zeitung Nr. 262 (10.11.2001), S. 2.
- [FAZ 10.11.01b] Frankfurter Allgemeine Zeitung (2001) (ohne Verfasser): Union fordert mehr Geld für Stammzellforschung. In: Frankfurter Allgemeine Zeitung Nr. 262 (10.11.2001), S. 1.

- [FAZ 13.11.01a] Frankfurter Allgemeine Zeitung (2001) (ohne Verfasser): Enquete-Kommission lehnt Tötung von Embryonen ab. In: Frankfurter Allgemeine Zeitung Nr. 264 (13.11.2001), S. 4.
- [FAZ 13.11.01b] Frankfurter Allgemeine Zeitung (2001) (ohne Verfasser): Wie in Amerika. In: Frankfurter Allgemeine Zeitung Nr. 264 (13.11.2001), S. 14.
- [FAZ 13.11.01c] Schwägerl, Christian (2001): Türspalterei. Clement sorgt für Durchzug beim Stammzellimport. In: Frankfurter Allgemeine Zeitung Nr. 264 (13.11.2001), S. 47.
- [FAZ 14.11.01a] Frankfurter Allgemeine Zeitung (2001) (ohne Verfasser): Enquete-Kommission ohne offizielles Votum. In: Frankfurter Allgemeine Zeitung Nr. 265 (14.11.2001), S. 8.
- [FAZ 14.11.01b] Schwägerl, Christian (2001): Schallende Ohrfeige. Gegen Importpläne: Die Enquete-Kommission deckelt die DFG. In: Frankfurter Allgemeine Zeitung Nr. 265 (14.11.2001), S. 49.
- [FAZ 19.11.01] Bahnen, Achim/Bahners, Patrick (2001): Das letzte Wort ist die Verfassung. Wem Menschenwürde zukommt, kann die Wissenschaft nicht entscheiden: Ein Gespräch mit Hans-Jochen Vogel über Embryonenschutz und Stammzellimport. In: Frankfurter Allgemeine Zeitung Nr. 269 (19.11.2001), S. 44.
- [FAZ 21.11.01] Geis, Norbert (2001): Der Import widerspricht der Zielsetzung des Gesetzes. In: Frankfurter Allgemeine Zeitung Nr. 271 (21.11.2001), S. 14
- [FAZ 22.11.01a] Beyreuther, Konrad, Ho, Anthony (2001): Ohne Embryonenopfer. Therapiehoffnung. In: Frankfurter Allgemeine Zeitung Nr. 272 (22.11.2001), S. 49.
- [FAZ 22.11.01b] Frankfurter Allgemeine Zeitung (2001) (ohne Verfasser): Korridore. Das Spektrum der Stammzellforschung. In: Frankfurter Allgemeine Zeitung Nr. 272 (22.11.2001), S. 47.
- [FAZ 22.11.01c] Frankfurter Allgemeine Zeitung (2001) (ohne Verfasser): Ethikrat entscheidet Ende November. In: Frankfurter Allgemeine Zeitung Nr. 272 (22.11.2001), S. 5.
- [FAZ 23.11.01a] Frankfurter Allgemeine Zeitung (2001) (ohne Verfasser): Winnackers Weg. In: Frankfurter Allgemeine Zeitung Nr. 273 (23.11.2001), S. 45.
- [FAZ 23.11.01b] Riedel, Ulrike (2001): Forschungsfreiheit ja. Aber begrenzt auf die Bush-Stammzelllinien. In: Frankfurter Allgemeine Zeitung Nr. 273 (23.11.2001), S. 49.
- [FAZ 24.11.01] Schwägerl, Christian (2001): Spitzenforscher. In: Frankfurter Allgemeine Zeitung Nr. 274 (24.11.2001), S. 12.
- [FAZ 26.11.01a] Frankfurter Allgemeine Zeitung (2001) (ohne Verfasser): Menschliche Embryozellen geklont. In: Frankfurter Allgemeine Zeitung Nr. 275 (26.11.2001), S. 1.
- [FAZ 26.11.01b] Frankfurter Allgemeine Zeitung (2001) (ohne Verfasser): Erstmals menschliche Embryonen durch Klonen hergestellt. Amerikanisches Unternehmen wollte durch Versuche Stammzellen gewinnen. In: Frankfurter Allgemeine Zeitung Nr. 275 (26.11.2001), S. 1.
- [FAZ 27.11.01a] Bahnen, Achim (2001): Grober Keil. Die Tor macht weit: Bulmahn hat es eiliger als die DFG. In: Frankfurter Allgemeine Zeitung Nr. 276 (27.11.2001), S. 47.
- [FAZ 27.11.01b] Müller-Jung, Joachim (2001): Biobasteln mit Joystick. Wo Dämme brechen: Ein Besuch in der amerikanischen Klonschmiede ACT. In: Frankfurter Allgemeine Zeitung Nr. 276 (27.11.2001), S. 45.
- [FAZ 27.11.01c] Schwägerl, Christian (2001): Der Tag wird kommen. Wie geht es im Inneren einer Klonschmiede zu? Ein Gespräch mit Ronald M. Green, Leiter der Ethikkommission von ACT, der Firma, die den ersten menschlichen Embryo klonete. In: Frankfurter Allgemeine Zeitung Nr. 278 (29.11.2001), S. 55.

- [FAZ 27.11.01d] Schwägerl, Christian (2001): Erste Schritte zur Klonindustrie? Versuche mit geringer Erfolgsquote und mangelnder Transparenz. In: Frankfurter Allgemeine Zeitung Nr. 276 (27.11.2001), S. 46.
- [FAZ 27.11.01e] Schirrmacher, Frank (2001): Unser Sprößling. Der erste geklonte menschliche Embryo stellt die Machtfrage. In: Frankfurter Allgemeine Zeitung Nr. 276 (27.11.2001), S. 45.
- [FAZ 29.11.01] Schwägerl, Christian (2001): Ein erhellender Blitz. Die Nachricht vom geklonten Embryo beschäftigt die Ethikräte. In: Frankfurter Allgemeine Zeitung Nr. 278 (29.11.2001), S. 1.
- [FAZ 30.11.01] Frankfurter Allgemeine Zeitung (2001) (ohne Verfasser): Mehrheit des Ethikrats für Stammzellimport. Einfuhr soll vorläufig auf drei Jahre befristet werden. Keine Beschränkung auf existierende Kulturen. In: Frankfurter Allgemeine Zeitung Nr. 279 (30.11.2001), S. 1.
- [FAZ 1.12.01a] Frankfurter Allgemeine Zeitung (2001) (ohne Verfasser): „Nicht sicher, daß kein Embryo sterben muß“. Reaktionen auf Votum des Ethikrats. Kritik aus der Enquete-Kommission, Unterstützung aus der Wissenschaft. In: Frankfurter Allgemeine Zeitung Nr. 280 (01.12.2001), S. 1.
- [FAZ 1.12.01b] Frankfurter Allgemeine Zeitung (2001) (ohne Verfasser): Stichtag. In: Frankfurter Allgemeine Zeitung Nr. 280 (01.12.2001), S. 41.
- [FAZ 1.12.01c] Rosenfelder, Andreas (2001): Wünsche on the rocks. Zur Gentechnik: Kölner Streitgespräch mit Wolfgang Clement. In: Frankfurter Allgemeine Zeitung Nr. 280 (01.12.2001), S. 44.
- [FAZ 3.12.01] Müller-Jung, Joachim (2001): Stammzellen – der nächste Schritt. Verwandelte Embryonalzellen des Menschen in Mäusehirn. In: Frankfurter Allgemeine Zeitung Nr. 281 (03.12.2001), S. 46.
- [FAZ 4.12.01] Frankfurter Allgemeine Zeitung (2001) (ohne Verfasser): Zeitfrage. In: Frankfurter Allgemeine Zeitung Nr. 282 (04.12.2001), S. 12.
- [FAZ 5.12.01a] Frankfurter Allgemeine Zeitung (2001) (ohne Verfasser): Folgeschweres Klonen. Stammzellforscher kündigt als Berater. In: Frankfurter Allgemeine Zeitung Nr. 283 (05.12.2001), S. 50.
- [FAZ 5.12.01b] Pieplow, Sylvia (2001): Stammzell-Ersatz nach Herzinfarkt. Wie aus Embryonen neues Gewebe gewonnen wird. In: Frankfurter Allgemeine Zeitung Nr. 283 (05.12.2001), S. N1.
- [FAZ 6.12.01] Löwenstein, Stephan (2001): Unter Sonstiges. In Bioethik-Fragen hat sich die CDU in Dresden nicht zu einer gemeinsamen Haltung durchgerungen. In: Frankfurter Allgemeine Zeitung Nr. 284 (06.12.2001), S. 16.
- [FAZ 8.12.01] Frankfurter Allgemeine Zeitung (2001) (ohne Verfasser): Rüttgers für Stammzellimport unter Auflagen. Beschränkung auf bestehende Kulturen. In: Frankfurter Allgemeine Zeitung Nr. 286 (08.12.2001), S. 1.
- [FAZ 10.12.01] Frankfurter Allgemeine Zeitung (2001) (ohne Verfasser): Pragmatisch. In: Frankfurter Allgemeine Zeitung Nr. 287 (10.12.2001), S. 12.
- [FAZ 11.12.01a] Frankfurter Allgemeine Zeitung (2001) (ohne Verfasser): Bulmahn gegen EU-Förderung der Embryonen-Forschung. In: Frankfurter Allgemeine Zeitung Nr. 288 (11.12.2001), S. 5.
- [FAZ 11.12.01b] Frankfurter Allgemeine Zeitung (2001) (ohne Verfasser): Ja zum Klonen. Plädoyer der Medizin-Nobelpreisträger. In: Frankfurter Allgemeine Zeitung Nr. 288 (11.12.2001), S. 44.
- [FAZ 12.12.01] Frankfurter Allgemeine Zeitung (2001) (ohne Verfasser): Moratorium in Europa. Kein EU-Geld für Embryonenforschung. In: Frankfurter Allgemeine Zeitung Nr. 289 (12.12.2001), S. 44.
- [FAZ 13.12.01] Frankfurter Allgemeine Zeitung (2001) (ohne Verfasser): Brüssel: Klare Grenzen für Embryonenforschung. In: Frankfurter Allgemeine Zeitung Nr. 290 (13.12.2001), S. 2.
- [FAZ 14.12.01] Frankfurter Allgemeine Zeitung (2001) (ohne Verfasser): Stammzell-Import. Ethik-Votum aus der Ärztekammer. In: Frankfurter Allgemeine Zeitung Nr. 291 (14.12.2001), S. 44.

- [FAZ 17.12.01] Döring, Ole (2001): Der Embryo, vom Tiger gepackt. Die sagenhaften Pläne der chinesischen Stammzellindustrie: Partner für deutsche Forscher ? In: Frankfurter Allgemeine Zeitung Nr. 293 (17.12.2001), S. 52.
- [FAZ 18.12.01] Frankfurter Allgemeine Zeitung (2001) (ohne Verfasser): Zwei Anträge gegen Embryonen-Import. In: Frankfurter Allgemeine Zeitung Nr. 294 (18.12.2001), S. 4.
- [FAZ 19.12.01] Frankfurter Allgemeine Zeitung (2001) (ohne Verfasser): Konferenz über Embryoforschung. In: Frankfurter Allgemeine Zeitung Nr. 295 (19.12.2001), S. 6.
- [FAZ 20.12.01] Tillmann, Holger (2001): Menschen? Ach nein, das sind ja Fleischklopse. Die Worte des Propheten Mohammed können einen strengen Embryoschutz nicht begründen. In: Frankfurter Allgemeine Zeitung Nr. 296 (20.12.2001), S. 56.
- [FAZ 21.12.01a] Frankfurter Allgemeine Zeitung (2001) (ohne Verfasser): Votum des Ethikrats veröffentlicht. In: Frankfurter Allgemeine Zeitung Nr. 297 (21.12.2001), S. 2.
- [FAZ 21.12.01b] Schwägerl, Christian (2001): Hüter der Zelle. Grundsätzlich: Heinz Riesenhuber steht zum Embryonenschutz. In: Frankfurter Allgemeine Zeitung Nr. 297 (21.12.2001), S. 43.
- [FAZ 22.12.01a] Bahnen, Achim (2001): Selbstberatungsladen. Wir sind frei: Im Ethikrat bestimmen die Forscher die Preise. In: Frankfurter Allgemeine Zeitung Nr. 298 (22.12.2001), S. 37.
- [FAZ 22.12.01b] Schwägerl, Christian (2001): Stammzellen im Gleichgewicht. Schwierige Balance zwischen Erneuerung und Spezialisierung. In: Frankfurter Allgemeine Zeitung Nr. 298 (22.12.2001), S. 38.
- [FAZ 3.1.02a] Frankfurter Allgemeine Zeitung (2002) (ohne Verfasser): Bulmahn erwartet Mehrheit für Stammzellenimport. In: Frankfurter Allgemeine Zeitung Nr. 2 (03.01.2002), S. 4.
- [FAZ 3.1.02b] Frankfurter Allgemeine Zeitung (2002) (ohne Verfasser): Doppelmoral. In: Frankfurter Allgemeine Zeitung Nr. 2 (03.01.2002), S. 12.
- [FAZ 8.1.02] Wiehr, Eberhard (2002): Unzeitgemäße Definition des Lebensbeginns. Leserbrief. In: Frankfurter Allgemeine Zeitung Nr. 6 (08.01.2002), S. 8.
- [FAZ 9.1.02a] Frankfurter Allgemeine Zeitung (2002) (ohne Verfasser): Uneinigkeit unter Befürwortern von Stammzellimport. In: Frankfurter Allgemeine Zeitung Nr. 7 (09.01.2002), S. 1.
- [FAZ 9.1.02b] Schwägerl, Christian (2002): Die Risse verlaufen quer durch die Parteien. Von der Entscheidung zum Stammzellimport. In: Frankfurter Allgemeine Zeitung Nr. 7 (09.01.2002), S. 4.
- [FAZ 11.1.02] Frankfurter Allgemeine Zeitung (2002) (ohne Verfasser): Beratungen über Stammzell-Import. In: Frankfurter Allgemeine Zeitung Nr. 9 (11.01.2002), S. 2.
- [FAZ 12.1.02] Frankfurter Allgemeine Zeitung (2002) (ohne Verfasser): Teufel lehnt Stammzellimport ab. „Gegen den Geist des Embryonenschutzgesetzes“. Die Diskussionen im Bundestag. In: Frankfurter Allgemeine Zeitung Nr. 10 (12.01.2002), S. 5.
- [FAZ 14.1.02] Frankfurter Allgemeine Zeitung (2002) (ohne Verfasser): CDU findet keine gemeinsame Haltung zu Stammzell-Import. In: Frankfurter Allgemeine Zeitung Nr. 11 (14.01.2002), S. 4.
- [FAZ 15.1.02a] Frankfurter Allgemeine Zeitung (2002) (ohne Verfasser): „Fortschritt setzt sich durch“. Goll für Embryonenforschung und begrenzte Zulassung der PID. In: Frankfurter Allgemeine Zeitung Nr. 12 (15.01.2002), S. 4.
- [FAZ 15.1.02b] Frankfurter Allgemeine Zeitung (2002) (ohne Verfasser): Ringen um Mehrheit für Stammzellimport. In: Frankfurter Allgemeine Zeitung Nr. 12 (15.01.2002), S. 4.
- [FAZ 15.1.02c] Randow, Gero von (2002): Das Gesicht der Wissenschaft. In: Frankfurter Allgemeine Zeitung Nr. 12 (15.01.2002), S. 1.

- [FAZ 16.1.02] Frankfurter Allgemeine Zeitung (2002) (ohne Verfasser): Birkmann: Keine Kompromisse beim Schutz des Lebens. In: Frankfurter Allgemeine Zeitung Nr. 13 (16.01.2002), S. 2.
- [FAZ 17.1.02] Frankfurter Allgemeine Zeitung (2002) (ohne Verfasser): Drei Anträge der Union zu Stammzellforschung. In: Frankfurter Allgemeine Zeitung Nr. 14 (17.01.2002), S. 2.
- [FAZ 18.1.02a] Frankfurter Allgemeine Zeitung (2002) (ohne Verfasser): Union: Stammzellimport nur im Ausnahmefall. In: Frankfurter Allgemeine Zeitung Nr. 15 (18.01.2002), S. 4.
- [FAZ 18.1.02b] Hanimann, Joseph (2002): Dingsda. Rohstoff Embryo: Frankreich aktualisiert seine Bioethik. In: Frankfurter Allgemeine Zeitung Nr. 15 (18.01.2002), S. 47.
- [FAZ 19.1.02] Cromme, Franz (2002): Hehlerei mit Stammzellen. Leserbrief. In: Frankfurter Allgemeine Zeitung Nr. 16 (19.01.2002), S. 48.
- [FAZ 21.1.02] Frankfurter Allgemeine Zeitung (2002) (ohne Verfasser): Däubler-Gmelin gegen Stammzellimport. In: Frankfurter Allgemeine Zeitung Nr. 17 (21.01.2002), S. 4.
- [FAZ 22.1.02a] Frankfurter Allgemeine Zeitung (2002) (ohne Verfasser): Catenhausen: Stammzellimport erst nach gesetzlicher Regelung. In: Frankfurter Allgemeine Zeitung Nr. 18 (22.01.2002), S. 4.
- [FAZ 22.1.02b] Schwägerl, Christian (2002): Vor Ladenschluß. Stammzellforschung: Selbsterkundung im Hause Bulmahn. In: Frankfurter Allgemeine Zeitung Nr. 18 (22.01.2002), S. 41.
- [FAZ 23.1.02a] Anselm, Reiner (u.a.) (2002): Pluralismus als Markenzeichen. Eine Stellungnahme evangelischer Ethiker zur Debatte um die Embryonenforschung. In: Frankfurter Allgemeine Zeitung Nr. 19 (23.01.2002), S. 8.
- [FAZ 23.1.02b] Frankfurter Allgemeine Zeitung (2002) (ohne Verfasser): Mehrheit in Unionsfraktion gegen Stammzellimport. Informelles Meinungsbild vor Bundestagsentscheidung am 30. Januar. Hinze für Nutzung von Vorkernstadien. In: Frankfurter Allgemeine Zeitung Nr. 19 (23.01.2002), S. 4.
- [FAZ 23.1.02c] Meisner, Joachim (2002): Am Deich gibt es keine Kompromisse. In: Frankfurter Allgemeine Zeitung Nr. 19 (23.01.2002), S. 12.
- [FAZ 23.1.02d] Müller, Reinhard (2002): Wagner gegen Stammzellimport. In: Frankfurter Allgemeine Zeitung Nr. 19 (23.01.2002), S. 4.
- [FAZ 23.1.02e] Schmoll, Heike (2002): Die EKD ist gegen den Import von Stammzellen. In: Frankfurter Allgemeine Zeitung Nr. 19 (23.01.2002), S. 8.
- [FAZ 23.1.02f] Schmoll, Heike (2002): Ethiker schlagen Kompromiß zum Stammzellimport vor. In: Frankfurter Allgemeine Zeitung Nr. 19 (23.01.2002), S. 1.
- [FAZ 24.1.02a] Frankfurter Allgemeine Zeitung (2002) (ohne Verfasser): Schröder will sich über Stammzellen äußern. In: Frankfurter Allgemeine Zeitung Nr. 20 (24.01.2002), S. 4.
- [FAZ 24.1.02b] Sahn, Stephan (2002): Wer den Schaden hat, kann die Ethik entsorgen. Kommissionen als Abrissbirnen für den Embryonenschutz: Blick in bioethische Zeitschriften. In: Frankfurter Allgemeine Zeitung Nr. 20 (24.01.2002), S. 44.
- [FAZ 25.1.02a] Frankfurter Allgemeine Zeitung (2002) (ohne Verfasser): Gemeinsamer Antrag der Import-Befürworter? In: Frankfurter Allgemeine Zeitung Nr. 21 (25.01.2002), S. 2.
- [FAZ 25.1.02b] Müller-Jung, Joachim (2002): Ein Königsweg zu Stammzellen? Die Vorschläge für ethisch unverfängliche Lösungen wuchern. In: Frankfurter Allgemeine Zeitung Nr. 21 (25.01.2002), S. 46.
- [FAZ 26.1.02a] Bahnen, Achim (2002): Schlußspurt. Vor der Stammzelldebatte: Der Ethikrat stellt sich Fragen. In: Frankfurter Allgemeine Zeitung Nr. 22 (26.01.2002), S. 41.

- [FAZ 26.1.02b] Frankfurter Allgemeine Zeitung (2002) (ohne Verfasser): Kein Stammzellkonsum. Bundesärztekammer bezieht Stellung. In: Frankfurter Allgemeine Zeitung Nr.22(26.01.2002), S. 43.
- [FAZ 26.1.02c] Frankfurter Allgemeine Zeitung (2002) (ohne Verfasser): Breiter Konsens für strengen Embryonenschutz. Eine parteiübergreifende Lösung zeichnet sich ab. Import bestehender Stammzellkulturen soll möglich sein. In: Frankfurter Allgemeine Zeitung Nr. 22 (26.01.2002), S. 1.
- [FAZ 28.1.02a] Frankfurter Allgemeine Zeitung (2002) (ohne Verfasser): Initiative für Stammzellimport unter strikten Auflagen stößt auf Zustimmung. Naturwissenschaftler warnen aber vor weiteren Verzögerungen. Skepsis gegenüber Beschränkung auf schon existierenden Zelllinien. In: Frankfurter Allgemeine Zeitung Nr. 23 (28.01.2002), S. 4.
- [FAZ 28.1.02b] Höfling, Wolfram (2002): Dem Embryo in größter Not bringt der Mittelweg - das Leben? Vor der Abstimmung: Die Argumente für einen Stammzellimport „unter strengen Bedingungen“ auf dem Prüfstand des Verfassungsrechts. In: Frankfurter Allgemeine Zeitung Nr. 23 (28.01.2002), S. 45.
- [FAZ 28.1.02c] Müller, Peter (2002): Dammbbruch. In: Frankfurter Allgemeine Zeitung Nr. 23 (28.01.2002), S. 12.
- [FAZ 29.1.02a] Hefty, Georg Paul (2002): Die im Dunkeln. In: Frankfurter Allgemeine Zeitung Nr. 24 (29.01.2002), S. 1.
- [FAZ 29.1.02b] Mejias, Jordan (2002): Vorgebirge der Schöpfung: Amerikas aparte Bio-Koalitionen. In: Frankfurter Allgemeine Zeitung Nr. 24 (29.01.2002), S. 52.
- [FAZ 30.1.02a] Deckers, Daniel (2002): Kein katholischer Fundamentalismus. Forschung an embryonalen Stammzellen wird abgelehnt - ohne Wenn und Aber. In: Frankfurter Allgemeine Zeitung Nr. 25 (30.01.2002), S. 4.
- [FAZ 30.1.02b] Deckers, Daniel (2002): Sonderweg. In: Frankfurter Allgemeine Zeitung Nr. 25 (30.01.2002), S. 1.
- [FAZ 30.1.02c] Frankfurter Allgemeine Zeitung (2002) (ohne Verfasser): Für eine Ethik des Heilens. In: Frankfurter Allgemeine Zeitung Nr. 25 (30.01.2002), S. 4.
- [FAZ 30.1.02d] Frankfurter Allgemeine Zeitung (2002) (ohne Verfasser): Neutralitätspflicht. In: Frankfurter Allgemeine Zeitung Nr. 25 (30.01.2002), S. 41.
- [FAZ 30.1.02e] Frankfurter Allgemeine Zeitung (2002) (ohne Verfasser): Forschen, aber nicht töten. In: Frankfurter Allgemeine Zeitung Nr. 25 (30.01.2002), S. 4.
- [FAZ 30.1.02f] Freund, Andrea (2002): Rückwärts zum Ursprung. Konrad Beyreuther verurteilt die Forschung an embryonalen Stammzellen. In: Frankfurter Allgemeine Zeitung Nr. 25 (30.01.2002), S. 9.
- [FAZ 30.1.02g] Lindner, Roland (2002): „Stammzelltherapie wird eine Nische bleiben“. Die wirtschaftliche Bedeutung des Forschungsgebietes ist schwer abschätzbar. In: Frankfurter Allgemeine Zeitung Nr. 25 (30.01.2002), S. 24.
- [FAZ 30.1.02h] Rasche, Uta (2002): Nicht mit einer Stimme. Auch in der Frage des Stammzellimports pflegt die evangelische Kirche die Debattenkultur. In: Frankfurter Allgemeine Zeitung Nr. 25 (30.01.2002), S. 4.
- [FAZ 30.1.02i] Schwägerl, Christian (2002): Eine Frage des Gewissens. Der Bundestag stimmt heute über drei Anträge zum Stammzellimport ab. In: Frankfurter Allgemeine Zeitung Nr. 25 (30.01.2002), S. 1.
- [FAZ 31.1.02a] Frankfurter Allgemeine Zeitung (2002) (ohne Verfasser): Clement: Forschung kann beginnen. In: Frankfurter Allgemeine Zeitung Nr. 26 (31.01.2002), S. 2.

- [FAZ 31.1.02b] Frankfurter Allgemeine Zeitung (2002) (ohne Verfasser): Der Bundestag will Stammzellimport erlauben. „Eine Tötung von Embryonen muss verboten bleiben“. Die Gegner im zweiten Wahlgang unterlegen. In: Frankfurter Allgemeine Zeitung Nr. 26 (31.01.2002), S. 1.
- [FAZ 31.1.02c] Frankfurter Allgemeine Zeitung (2002) (ohne Verfasser): Ausgehöhlte Rechtslage. In: Frankfurter Allgemeine Zeitung Nr. 26 (31.01.2002), S. 1.
- [FAZ 31.1.02d] Müller-Jung, Joachim (2002): Stammzell-Welle. Echte und fragliche Fortschritte. In: Frankfurter Allgemeine Zeitung Nr. 26 (31.01.2002), S. 42.
- [FAZ 31.1.02e] Schwägerl, Christian (2002): Vom Rubikon zum Labyrinth der Zivilisation. Nach einer ruhigen und engagierten Debatte entscheidet sich der Bundestag für den Import embryonaler Stammzellen unter Auflagen. In: Frankfurter Allgemeine Zeitung Nr. 26 (31.01.2002), S. 3.

## Mediendokumente der Frankfurter Rundschau

- [FR 9.12.98] Frankfurter Rundschau (ohne Verfasser): Großbritannien. Klon-Forscher empfehlen Lockerung der Gesetze. In: Frankfurter Rundschau Nr. (9.12.1998), S. 4.
- [FR 22.01.99] Frankfurter Rundschau (ohne Verfasser): Bald Klonen von Menschenzellen. „Dolly“-Forscher will damit Alzheimer bekämpfen. In: Frankfurter Rundschau Nr. 18 (22.01.1999), S. 35.
- [FR 29.01.99] Ostwald, Gisela (1999): Nachsaat für das Hirn. Mediziner wollen bei Älteren neue Stammzellen „pflanzen“. In: Frankfurter Rundschau Nr. 24 (29.01.1999), S. 37.
- [FR 22.3.99] Emmrich, Michael (1999): Nur noch die Frage, wann. Zuchtlabor für Organersatz. In: Frankfurter Rundschau Nr. 68 (22.03.1999), S. 22.
- [FR 7.4.99] Emmrich, Michael (1999): Alzheimer-Gesellschaft lehnt umstrittene Bioethik-Konvention ab. Großer Patientenverband legt sich eindeutig fest. Warnung vor Forschung am Menschen. Signal an die Politik. In: Frankfurter Rundschau Nr. 80 (07.04.1999), S. 42.
- [FR 6.8.99] Gassen, Hans Günter (1999): Kopien des Ichs. Die Gentechnik und ihre humanitären Leitplanken. In: Frankfurter Rundschau Nr. 180 (06.08.1999), S. 10.
- [FR 28.8.99] Frankfurter Rundschau (2000) (ohne Verfasser): Bulmahn wendet sich gegen Import von Stammzellen. In: Frankfurter Rundschau Nr. 198 (28.08.2000), S. 4.
- [FR 27.12.99] Emmrich, Michael (1999): Der verwertbare Mensch. In: Frankfurter Rundschau Nr. 301 (27.12.1999), S. 3.
- [FR 20.6.00] Frankfurter Rundschau (2000) (ohne Verfasser): Forscher planen Import embryonaler Stammzellen. Bundesregierung sieht keine rechtlichen Probleme. In: Frankfurter Rundschau Nr. 140 (20.06.2000), S. 4.
- [FR 27.6.00] Emmrich, Michael (2000): „Es ist natürlich irgendwo eine Doppelmoral“. Die Wissenschaftlerin Anna M. Wobus über das Dilemma der Stammzellenforschung: Zwischen dem Schutz von Embryonen und der Hoffnung, Krankheiten zu heilen. Interview. In: Frankfurter Rundschau Nr. 145 (27.06.2000), S. 5.
- [FR 22.7.00] Spork, Peter (2000): Mediziner träumen schon davon, Organe zu züchten. Stammzellen sollen eines Tages gegen Parkinson, Diabetes, Herzinfarkt, Lähmungen und andere Leiden helfen. In: Frankfurter Rundschau Nr. 167 (22.07.2000), S. 8.
- [FR 17.8.00] Frankfurter Rundschau (2000) (ohne Verfasser): Experimente mit Embryozellen. Hoffnung für Kranke. Schranke am deutschen Schutzgesetz. In: Frankfurter Rundschau Nr. 189 (17.08.2000), S. 34.

- [FR 18.8.00] Frankfurter Rundschau (2000) (ohne Verfasser): Stammzellen. In: Frankfurter Rundschau Nr. 190 (18.08.2000), S. 7.
- [FR 19.8.00] Kappler, Wolfgang (2000): Ein Füllhorn der künftigen Medizin. In: Frankfurter Rundschau Nr. 191 (19.08.2000), S. 6.
- [FR 28.8.00] Frankfurter Rundschau (2000): Bulmahn wendet sich gegen Import von Stammzellen. In: Frankfurter Rundschau Nr. 198 (28.08.2000), S. 4.
- [FR 21.10.00] Frankfurter Rundschau (2000) (ohne Verfasser): Forscher möchte Stammzellen importieren. In: Frankfurter Rundschau Nr. 244 (21.10.2000), S. 9.
- [FR 21.12.00a] Emmrich, Michael (2000): Klonen als Chefsache. Briten erlauben Produktion embryonaler Stammzellen, und der Kanzler macht sich zum Fürsprecher der Gentechnik. In: Frankfurter Rundschau Nr. 296 (21.12.2000), S. 3.
- [FR 21.12.00b] Emmrich, Michael (2000): Zwischen Heil und Schrecken. Forscher wandeln auf einem schmalen ethischen Grat. In: Frankfurter Rundschau Nr. 296 (21.12.2000), S. 5.
- [FR 21.12.00c] Frankfurter Rundschau (2000) (ohne Verfasser): Kirchen fürchten Dammbbruch in Biomedizin. „Leben nicht produzieren, um es zu verbrauchen“. Auch Mediziner und Forscher skeptisch. In: Frankfurter Rundschau Nr. 296 (21.12.2000), S. 5.
- [FR 28.12.00] Frankfurter Rundschau (2000) (ohne Verfasser): Forschern gelingt erstmals Produktion von Stammzellen im Labor. In: Frankfurter Rundschau Nr. 300 (28.12.2000), S. 1.
- [FR 2.1.01a] Emmrich, Michael (2001): Experten gegen Erzeugung von Embryonen für medizinische Zwecke. In: Frankfurter Rundschau Nr. 1 (02.01.2001), S. 1.
- [FR 2.1.01b] Frankfurter Rundschau (2001) (Ohne Verfasser): Bundesregierung soll „therapeutischem Klonen“ einen Riegel verschieben. Experten der Enquetekommission wenden sich gegen „Verrohstofflichung“ von Embryonen. In: Frankfurter Rundschau Nr. 1 (02.01.2001), S. 5.
- [FR 11.1.01] Braunschweig, Nickel (2001): Entspricht „therapeutisches Klonen“ wirklich der Ethik? In: Frankfurter Rundschau Nr. 9 (11.01.2001), S. 8.
- [FR 20.1.01] Emmrich, Michael u.a. (2001): Ein Rat soll Gendebatte lenken. Schröder will neues Gremium, das ethische Fragen klärt. In: Frankfurter Rundschau Nr. 17 (20.01.2001), S. 4.
- [FR 3.2.01] Breuberg-Sandbach/Löhle, Adolf (2001): Menschenwürde schützen. In: Frankfurter Rundschau Nr. 178 (03.02.2001), S. 8.
- [FR 5.2.01] Frankfurter Rundschau (2001) (ohne Verfasser): Rot-Grün verschiebt Pläne für Gentechnik-Gesetze. In: Frankfurter Rundschau Nr. 30 (05.02.2001), S. 5.
- [FR 10.2.01a] Frankfurter Rundschau (2001) (ohne Verfasser): Bush finanziert Gen-Forschung. In: Frankfurter Rundschau Nr. 184 (10.02.2001), S. 1.
- [FR 10.2.01b] Frankfurter Rundschau (2001) (ohne Verfasser): Hoppe rechnet mit starkem Druck beim Thema Klonen. In: Frankfurter Rundschau Nr. 35 (10.02.2001), S. 5.
- [FR 19.2.01] Geisler, Linus S. (2001): Fragwürdiger Umgang mit den Hoffnungen kranker Menschen. Das so genannte therapeutische Klonen. Linus S. Geisler über die Suche nach den besten Argumenten. In: Frankfurter Rundschau Nr. 42 (19.02.2001), S. 9.
- [FR 27.2.01] Frankfurter Rundschau (2001) (ohne Verfasser): Nobelpreisträger plädieren für Stammzellen-Forschung. In: Frankfurter Rundschau Nr. 49 (27.02.2001), S. 23.
- [FR 2.3.01] Zentralkomitee der deutschen Katholiken [=ZDK] (2001): Fast-religiöse Verheißungen der Medizin sind realitätsferne Illusionen. Biomedizin und christliches Menschenbild. Ein Diskussion-

- papier des Zentralkomitees der deutschen Katholiken. In: Frankfurter Rundschau Nr. 52 (02.03.2001), S. 18.
- [FR 14.3.01] Frankfurter Rundschau (2001) (ohne Verfasser): Forscher gegen Klonen von Organen. In: Frankfurter Rundschau Nr. 62 (14.03.2001), S. 4.
- [FR 15.3.01] Suchsland, Rüdiger (2001): Dr. Frankenstein will kein Scharlatan sein. Darf man Menschen kopieren? Eine Begegnung mit dem „Dolly“-Schöpfer Ian Wilmut. In: Frankfurter Rundschau Nr. 63 (15.03.2001), S. 18.
- [FR 26.3.01] Emmrich, Michael u.a. (2001): Embryonenschutzgesetz mit Indikationslösung. Interview. In: Frankfurter Rundschau Nr. 72 (26.03.2001), S. 7.
- [FR 3.5.01] Frankfurter Rundschau (2001) (ohne Verfasser): Zellen von Toten nutzen. Neue Behandlungsmethode lässt Alzheimerpatienten hoffen. In: Frankfurter Rundschau Nr. 102 (03.05.2001), S. 1.
- [FR 4.5.01a] Frankfurter Rundschau (2001) (ohne Verfasser): Forschung an embryonalen Zellen soll möglich werden. In: Frankfurter Rundschau Nr. 103 (04.05.2001), S. 1.
- [FR 4.5.01b] Frankfurter Rundschau (2001) (ohne Verfasser): Forscher für Arbeit mit Stammzellen. In: Frankfurter Rundschau Nr. 103 (04.05.2001), S. 5.
- [FR 5.5.01a] Emmrich, Michael (2001): Der Schwenk der Wissenschaft. Forschungsgemeinschaft will doch Zugang zu Embryonen. In: Frankfurter Rundschau Nr. 104 (05.05.2001), S. 4.
- [FR 5.5.01b] Frankfurter Rundschau (2001) (ohne Verfasser): Forschungsantrag auf Eis gelegt. Stammzellen-Projekt der DFG stößt auf Ablehnung. In: Frankfurter Rundschau Nr. 104 (05.05.2001), S. 1.
- [FR 7.5.01] Frankfurter Rundschau (2001) (ohne Verfasser): Liberale begrüßen Embryo-Forschung. In: Frankfurter Rundschau Nr. 105 (07.05.2001), S. 5.
- [FR 8.5.01a] Emmrich, Michael (2001): DFG setzt Recht auf Leben Recht auf Forschung gleich. Kirche nennt geänderte Empfehlung der Experten fatal. In: Frankfurter Rundschau Nr. 106 (08.05.2001), S. 7.
- [FR 8.5.01b] Emmrich, Michael (2001): Maßlose Wissenschaft. In: Frankfurter Rundschau Nr. 106 (08.05.2001), S. 3.
- [FR 8.5.01c] Emundts, Corinna (2001): Gentechnik spaltet Regierung. Däubler-Gmelin lehnt Versuche mit Embryozellen ab. Bulmahn für Forschung. In: Frankfurter Rundschau Nr. 106 (08.05.2001), S. 1.
- [FR 8.5.01d] Frankfurter Rundschau (2001) (ohne Verfasser): US-Forscher züchten Stammzellen aus Gewebe von Leichen. In: Frankfurter Rundschau Nr. 106 (08.05.2001), S. 7.
- [FR 11.5.01] Frankfurter Rundschau (2001) (ohne Verfasser): Forschung an Stammzellen von Embryonen bleibt tabu. In: Frankfurter Rundschau Nr. 109 (11.05.2001), S. 4.
- [FR 12.5.01] Meng, Richard (2001): Gentechnik Frage des Gewissens. SPD will bei Abstimmungen auf Fraktionszwang verzichten. In: Frankfurter Rundschau Nr. 110 (12.05.2001), S. 4.
- [FR 15.5.01] Frankfurter Rundschau (2001) (ohne Verfasser): Tabus auf dem Rückzug. In: Frankfurter Rundschau Nr. 112 (15.05.2001), S. 3.
- [FR 16.5.01a] Emundts, Corinna (2001): Grüne bremsen bei Biomedizin. Eckpunktpapier lehnt Forschung mit Embryo-Zellen ab. In: Frankfurter Rundschau Nr. 113 (16.05.2001), S. 4.
- [FR 16.5.01b] Frankfurter Rundschau (2001) (ohne Verfasser): Grüne lehnen Versuche mit Embryos ab. In: Frankfurter Rundschau (16.05.2001), S. 1.
- [FR 21.5.01a] Emundts, Corinna (2001): Rau will Gentechnik bremsen. Bundespräsident besteht auf Primat der Ethik. Widerspruch zu Schröder. In: Frankfurter Rundschau Nr. 116 (19.05.2001), S. 1.

- [FR 21.5.01b] Frankfurter Rundschau (2001) (ohne Verfasser): „Gentechnik sichert Wohlstand“. Kanzler widerspricht Rau und betont Chancen der Biomedizin. In: Frankfurter Rundschau Nr. 117 (21.05.2001), S. 1.
- [FR 21.5.01c] Wagner, Wolfgang (2001): „Schröder will PID, weil Embryonenhandel ein blühender Markt wird“. Der Menschenrechtsbeauftragte der Bundesärztekammer, Montgomery, warnt eindringlich davor, Präimplantationsdiagnostik zuzulassen. Interview. In: Frankfurter Rundschau Nr. 117 (21.05.2001), S. 6.
- [FR 22.5.01a] Frankfurter Rundschau (2001) (ohne Verfasser): SPD-Vorstand in Debatte über Gentechnik uneins. In: Frankfurter Rundschau Nr. 118 (22.05.2001), S. 1.
- [FR 22.5.01b] Frankfurter Rundschau (2001) (ohne Verfasser): Vorerst keine einheitliche Haltung zur Gentechnik. In: Frankfurter Rundschau Nr. 118 (22.05.2001), S. 4.
- [FR 23.5.01] Frankfurter Rundschau (2001) (ohne Verfasser): EKD will unbeschränkten Schutz für Embryonen. In: Frankfurter Rundschau Nr. 119 (23.05.2001), S. 4.
- [FR 25.5.01] Schlüter, Christian (2001): Genomkonsens. Karlsruher Verfassungstalk. In: Frankfurter Rundschau Nr. 120 (25.05.2001), S. 22.
- [FR 28.5.01a] Altmeyer, Martin (2001): Das trockene Bett des Rubikon. Über Raumbedingungen und Grenzen der neuen Biopolitik. In: Frankfurter Rundschau Nr. 122 (28.05.2001), S. 10.
- [FR 28.5.01b] Emmrich, Michael (2001): Erwachsene Stammzellen können mehr als gedacht. In: Frankfurter Rundschau Nr. 122 (28.05.2001), S. 6.
- [FR 28.5.01c] Janeck, Axel (2001): Gegen Eingriffe von Gen-Mechanikern. In: Frankfurter Rundschau Nr. 122 (28.05.2001), S. 19.
- [FR 28.5.01d] Sperber, Katharina (2001): Ärzte warnen vor Druck „hochgepeitschter Heilungserwartungen“. Mediziner-Organisation wendet sich gegen Forschung an embryonalen Stammzellen. Limbach fordert allgemeine Debatte. In: Frankfurter Rundschau Nr. 122 (28.05.2001), S. 1.
- [FR 29.5.01a] Frankfurter Rundschau (2001) (ohne Verfasser): „PID, aber ohne eugenische Ziele“. CDU-Vize Rüttgers beschreibt Grundsätze zur Gentechnik. In: Frankfurter Rundschau Nr. 123 (29.05.2001), S. 5.
- [FR 29.5.01b] Sperber, Katharina (2001): „Wir hoffen, dass auch der Nutzen gesehen wird“. Interview mit Oliver Brüstle. In: Frankfurter Rundschau Nr. 123 (29.05.2001), S. 7.
- [FR 30.5.01] Storz, Wolfgang (2001): Fortschritt mit menschlichem Maß. In: Frankfurter Rundschau Nr. 124 (30.05.2001), S. 3.
- [FR 31.5.01a] Emmrich, Michael (2001): „Wir brauchen kein Hau-Ruck-Verfahren“. Interview mit DFG-Präsident Ernst-Ludwig Winnacker zum Streit über die Forschung an menschlichen Embryonen. In: Frankfurter Rundschau Nr. 125 (31.05.2001), S. 7.
- [FR 31.5.01b] Emundts, Corinna (2001): Ethik sprengt die Fraktionsgrenzen. Bei der Debatte über die Gentechnik stehen sich Wertkonservative und Wissenschaftsgläubige diametral gegenüber. In: Frankfurter Rundschau Nr. 125 (31.05.2001), S. 7.
- [FR 31.5.01c] Frankfurter Rundschau (2001) (ohne Verfasser): Wohin Gen sie? Alle Politiker fordern klare moralische Grenzen. Doch wo sie verlaufen, ist umstritten. In: Frankfurter Rundschau Nr. 125 (31.05.2001), S. 2.
- [FR 31.5.01d] Karisch, Karl-Heinz (2001): Zellen kennen keine Moral: Forschung muss erlaubt sein. In: Frankfurter Rundschau Nr. 125 (31.05.2001), S. 7.
- [FR 31.5.01e] Emmrich, Michael (2001): Falsche Heilserwartungen: Gentechnik darf nicht alles. In: Frankfurter Rundschau Nr. 125 (31.05.2001), S. 7.

- [FR 1.6.01a] Emundts, Corinna (2001): Moral gegen Moral. In der Bundestagsdebatte zur Gentechnik verlaufen die Fronten verdeckt quer durch die Parteien. In: Frankfurter Rundschau Nr. 126 (01.06.2001), S. 3.
- [FR 1.6.01b] Frankfurter Rundschau (2001) (ohne Verfasser): Überfraktionell. Abgeordnete gründen „Bündnis Menschenwürde“. In: Frankfurter Rundschau Nr. 126 (01.06.2001), S. 5.
- [FR 1.6.01c] Limbach, Jutta (2001): ...so hat die Freiheit der Forschung zurückzutreten. In: Frankfurter Rundschau Nr. 126 (01.06.2001), S. 16.
- [FR 2.6.01a] Frankfurter Rundschau (2001) (ohne Verfasser): Clement provoziert Empörung. In NRW soll Forschung mit Embryo-Stammzellen beginnen. In: Frankfurter Rundschau Nr. 127 (02.06.2001), S. 1.
- [FR 2.6.01b] Frankfurter Rundschau (2001) (ohne Verfasser): Clements Affront. In: Frankfurter Rundschau Nr. 127 (02.06.2001), S. 3.
- [FR 2.6.01c] Frankfurter Rundschau (2001) (ohne Verfasser): Embryonenschutzgesetz. In: Frankfurter Rundschau Nr. 127 (02.6.2001), S. 4.
- [FR 6.6.01a] Emrich, Michael u.a. (2001): „Mittelfristig auch zu importieren“. Forscher Brüste: Keine konkreten Vereinbarungen mit Haifa. In: Frankfurter Rundschau Nr. 129 (06.06.2001), S. 5.
- [FR 6.6.01b] Emundts, Corinna (2001): Forsch, die Forscher. In Stammzellen-Streit sind Wissenschaftler der Politik eine Nasenlänge voraus. In: Frankfurter Rundschau Nr. 129 (06.06.2001), S. 5.
- [FR 6.6.01c] Frankfurter Rundschau (2001) (ohne Verfasser): Clement rechtfertigt Vorstoß. „Kein Alleingang“ bei Stammzellen-Import. Grüne skeptisch. In: Frankfurter Rundschau Nr. 129 (06.06.2001), S. 1.
- [FR 7.6.01a] Frankfurter Rundschau (2001) (ohne Verfasser): Landtag für Bioethik-Symposium. Debatte zeigt uneinheitliches Bild. Bökel: „Pflicht zu zögern“. In: Frankfurter Rundschau Nr. 130 (07.06.2001), S. 35.
- [FR 7.6.01b] Frankfurter Rundschau (2001) (Ohne Verfasser): Uni Bonn sagt Ja zu Gen-Projekt. Ethikkommission stimmt Stammzellen-Forschung zu. In: Frankfurter Rundschau Nr. 130 (07.06.2001), S. 4.
- [FR 7.6.01c] Vetter, Hermann (2001): Inkonsequenz. Leserbrief. In: Frankfurter Rundschau Nr. 130 (07.06.2001), S. 8.
- [FR 8.6.01] Frankfurter Rundschau (2001) (ohne Verfasser): Genforscher gegen Moratorium. DFG will Entscheidung zu Embryo-Stammzellen verschieben. In: Frankfurter Rundschau Nr. 131 (08.06.2001), S. 6.
- [FR 9.6.01a] Emundts, Corinna u.a. (2001): Schröder widerspricht Bedenken gegen den Nationalen Ethikrat. In: Frankfurter Rundschau Nr. 132 (09.06.2001), S. 1.
- [FR 9.6.01b] Frankfurter Rundschau (2001) (ohne Verfasser): Vielstimmiger Rat. In: Frankfurter Rundschau Nr. 132 (09.06.2001), S. 3.
- [FR 11.6.01a] Frankfurter Rundschau (2001) (ohne Verfasser): Debatte zu Stammzellen angeheizt. Ethikrat wird sich zuerst mit umstrittenem Import befassen. In: Frankfurter Rundschau Nr. 133 (11.06.2001), S. 1.
- [FR 11.6.01b] Lemme, Hans-Joachim (2001): In der Gen-Forschung ist der Rubikon bereits überschritten. Leserbrief. In: Frankfurter Rundschau Nr. 133 (11.06.2001), S. 7.
- [FR 15.6.01a] Frankfurter Rundschau (2001) (ohne Verfasser): 300 000 Besucher beim Kirchentag in Frankfurt. Benda: Grundgesetz verbietet Forschung an Embryonen. In: Frankfurter Rundschau Nr. 136 (15.06.2001), S. 1.

- [FR 15.6.01b] Frankfurter Rundschau (2001) (ohne Verfasser): Christen warnen Genforscher. Der Kirchentag hat sein zentrales Streitthema gefunden: die Gentechnik. In: Frankfurter Rundschau Nr. 136 (15.06.2001), S. 1.
- [FR 16.6.01a] Emrich, Michael (2001): Wider die Anmaßung. Jurist Benda belehrt Befürworter der Embryonenforschung. In: Frankfurter Rundschau Nr. 137 (16.06.2001), S. 5.
- [FR 16.6.01b] Frankfurter Rundschau (2001) (ohne Verfasser): Zelle. In: Frankfurter Rundschau Nr. 137 (16.06.2001), S. 4.
- [FR 18.6.01a] Emrich, Michael (2001): Embryonen, Stammzellen und die Ethik des Heilens. Wolfgang Clement hatte bei der Diskussion über die Gentechnik keinen leichten Stand. In: Frankfurter Rundschau Nr. 138 (18.06.2001), S. 17.
- [FR 18.6.01b] Frankfurter Rundschau (2001) (ohne Verfasser): Gentechnik-Vorstoß attackiert. CDU-Chefin Merkel geht Clement beim Kirchentag scharf an. In: Frankfurter Rundschau Nr. 138 (18.06.2001), S. 1.
- [FR 19.6.01a] Emundts, Corinna (2001): CDU zögert noch beim Embryonenschutzgesetz. In: Frankfurter Rundschau Nr. 139 (19.06.2001), S. 4.
- [FR 19.6.01b] Frankfurter Rundschau (2001) (ohne Verfasser): DFG verschiebt Beschluss über Stammzellen-Projekt. In: Frankfurter Rundschau Nr. 139 (19.06.2001), S. 1.
- [FR 19.6.01c] Warzecha, Klaus (2001): Erschütterungen. Leserbrief. In: Frankfurter Rundschau Nr. 139 (19.06.2001), S. 8.
- [FR 20.6.01a] Emundts, Corinna (2001): Genforscher Brüstle will warten. Verschobene DFG-Entscheidung zu Stammzellen akzeptiert. In: Frankfurter Rundschau Nr. 140 (20.06.2001), S. 5.
- [FR 20.6.01b] Kettner, Matthias (2001): Keime der Vernunft? Von den Stammzellen zur Moral der Faszination. In: Frankfurter Rundschau Nr. 140 (20.06.2001), S. 17.
- [FR 21.6.01] Voss, Reinhard (2001): Grüne und CDU rügen Clement. Koalitionspartner nennt Biotechnik-Pläne inakzeptabel. In: Frankfurter Rundschau Nr. 141 (21.06.2001), S. 7.
- [FR 22.6.01] Rauter, Herbert (2001): Skandalös. Leserbrief. In: Frankfurter Rundschau Nr. 142 (22.06.2001), S. 8.
- [FR 23.6.01] Frankfurter Rundschau (2001) (ohne Verfasser): Berlin und Paris gegen Klonen. Gemeinsame Initiative. Möllemann macht Druck auf Clement. In: Frankfurter Rundschau Nr. 143 (23.06.2001), S. 5.
- [FR 26.6.01a] Frankfurter Rundschau (2001) (ohne Verfasser): SPD will vor 2002 kein neues Embryonenschutzgesetz. In: Frankfurter Rundschau Nr. 145 (26.06.2001), S. 1.
- [FR 26.6.01b] Sperber, Katharina (2001): Von Mäusen und Menschen. In: Frankfurter Rundschau Nr. 145 (26.06.2001), S. 3.
- [FR 28.6.01] Emundts, Corinna (2001): Moratorium findet mehr Freunde. Beim Stammzellen-Import nährt sich Rot-Grün der CDU an. In: Frankfurter Rundschau Nr. 147 (28.06.2001), S. 4.
- [FR 29.6.01a] Emundts, Corinna (2001): Importplan heizt Gen-Debatte an. Auch Kieler Uni erwägt Einfuhr embryonaler Stammzellen. In: Frankfurter Rundschau Nr. 148 (29.06.2001), S. 1.
- [FR 29.6.01b] Frankfurter Rundschau (2001) (ohne Verfasser): „Unkontrolliertes Rumdoktern“ empört die CDU. In: Frankfurter Rundschau Nr. 148 (29.06.2001), S. 5.
- [FR 29.6.01c] Frankfurter Rundschau (2001) (ohne Verfasser): Stammzellen. In: Frankfurter Rundschau Nr. 148 (29.06.2001), S. 5.

- [FR 29.6.01d] Sperber, Katharina (2001): Ohne Ethik-Votum wird „kein seriöser Forscher“ den Import wagen. In: Frankfurter Rundschau Nr. 148 (29.06.2001), S. 5.
- [FR 30.6.01] Voss, Reinhard (2001): Ein alter Hase will an Affen-Stammzellen forschem. In: Frankfurter Rundschau Nr. 149 (30.06.2001), S. 1.
- [FR 2.7.01a] Frankfurter Rundschau (2001) (ohne Verfasser): Gefährliche Experimente. In: Frankfurter Rundschau Nr. 150 (02.07.2001), S. 3.
- [FR 2.7.01b] Frankfurter Rundschau (2001) (ohne Verfasser): Limbach warnt vor Denkverbot. In: Frankfurter Rundschau Nr. 150 (02.07.2001), S. 5.
- [FR 2.7.01c] Voss, Reinhard (2001): Genforschung lastet auf Koalition. NRW-Grüne verstehen Vorstoß von Clement zu Stammzellen als Affront. In: Frankfurter Rundschau Nr. 150 (02.07.2001), S. 5.
- [FR 3.7.01a] Frankfurter Rundschau (2001) (Ohne Verfasser): Gentechnik. Forscher gibt Import von Stammzellen zu. In: Frankfurter Rundschau Nr. 151 (03.07.2001), S. 1.
- [FR 3.7.01b] Frankfurter Rundschau (2001) (ohne Verfasser): SPD/Bündnis. Koalition ringt um Linie zu Stammzellen-Import. In: Frankfurter Rundschau Nr. 151 (03.07.2001), S. 4.
- [FR 3.7.01c] Karisch, Karl-Heinz (2001): Menschlichkeit. In: Frankfurter Rundschau Nr. 151 (03.07.2001), S. 23.
- [FR 4.7.01a] Emundts, Corinna, Wagner, Wolfgang (2001): Forscher sollen freiwillig warten. Koalition lehnt Import-Stopp für Embryo-Stammzellen ab. In: Frankfurter Rundschau (04.07.2001), S. 4.
- [FR 4.7.01b] Frankfurter Rundschau (2001) (ohne Verfasser). Wörterbuch. Moratorium. CDU und CSU fordern einen vorläufigen Importstop für embryonale Stammzellen. Über den Antrag der Union auf ein Moratorium stimmt der Bundestag Donnerstag ab. In: Frankfurter Rundschau Nr. 152 (04.07.2001), S. 4.
- [FR 4.7.01c] Frankfurter Rundschau (2001) (ohne Verfasser): Gendebatte. Stammzellen: Kaum anwendbare Therapien. Forscher erwarten schnellere Erfolge beim Klonen. In: Frankfurter Rundschau Nr. 152 (04.07.2001), S. 2.
- [FR 5.7.01a] Emundts, Corinna, Meng, Richard (2001): Hoffen auf den Gewöhnungseffekt. Schröder will kein Import-Verbot für Stammzellen. In: Frankfurter Rundschau Nr. 153 (05.07.2001), S. 4.
- [FR 5.7.01b] Frankfurter Rundschau (2001) (ohne Verfasser): Stammzellendebatte. Kanzler drängt. Der Bundestag entscheidet heute über mehrere Anträge zur Gentechnik. In: Frankfurter Rundschau Nr. 152 (05.07.2001), S. 2.
- [FR 6.7.01a] Frankfurter Rundschau (2001) (ohne Verfasser): Stammzellenforschung. CDU Moratorium nach Debatte abgelehnt. In: Frankfurter Rundschau Nr. 154 (06.07.2001), S. 4.
- [FR 6.7.01b] Frankfurter Rundschau (2001) (ohne Verfasser): Stammzellen-Forschung. Kirchen bedauern Nein der Koalition zu Import-Verbot. In: Frankfurter Rundschau Nr. 154 (06.07.2001), S. 4.
- [FR 10.7.01] Emundts, Corinna (2001): Der Nationale Ethikrat gibt sich Mühe, nicht mächtig zu erscheinen. Auf ein geschliffenes Ja oder Nein zum Stammzellen-Import sollte Schröder nicht hoffen/Simitis: Ergebnis im September. In: Frankfurter Rundschau Nr. 157 (10.07.2001), S. 4.
- [FR 12.7.01a] Emmrich, Michael: US-Institut erzeugt Embryonen nur als Rohstoff für die Forschung. Wissenschaftler befruchtet menschliche Eizellen zur Stammzellen-Gewinnung / Kritiker: Das zeigt „wohin der Zug geht“. In: Frankfurter Rundschau Nr. 159 (12.07.2001), S. 1.
- [FR 12.7.01b] Frankfurter Rundschau (2001) (ohne Verfasser): Stammzellen. Mini-Mensch im Labor. Amerikanische Wissenschaftler züchteten menschliche Embryonen für die Forschung. Ihre deutschen Kollegen sind empört. In: Frankfurter Rundschau Nr. 159 (12.07.2001), S. 2.

- [FR 12.7.01c] Frankfurter Rundschau (2001) (ohne Verfasser): Ungewollte Offenheit. In: Frankfurter Rundschau Nr. 159 (12.07.2001), S. 3.
- [FR 13.7.01a] Emmrich, Michael/Emunds, Corinna (2001): „Forschung mit überzähligen Embryonen ist vertretbar“ Die Entwicklung in den USA hält Bundesforschungsministerin Edelgard Bulmahn für verantwortungslos. In: Frankfurter Rundschau Nr. 160 (13.07.2001), S. 5.
- [FR 13.7.01b] Frankfurter Rundschau (2001) (ohne Verfasser): Stammzellen-Forschung. Bulmahn verurteilt US-Wissenschaftler. In: Frankfurter Rundschau Nr. 160 (13.07.2001), S. 1.
- [FR 13.7.01c] Frankfurter Rundschau (2001) (ohne Verfasser): USA. Forscher starten Klon-Experimente. In: Frankfurter Rundschau Nr. 160 (13.07.2001), S. 5.
- [FR 16.7.01] Gerke, Michael (2001): Eine ethische Grundlage für das zu schaffende Recht. In: Frankfurter Rundschau Nr. 162 (16.07.2001), S. 7.
- [FR 21.7.01] Guha, Anton-Andreas (2001): Das Elend mit der Ethik. In: Frankfurter Rundschau Nr. 167 (21.07.2001), S. 3.
- [FR 24.7.01] Frankfurter Rundschau (2001) (ohne Verfasser): Papst prangert Züchten von Embryonen in den USA an. In: Frankfurter Rundschau Nr. 169 (24.07.2001), S. 2.
- [FR 25.7.01] Böttger, Carlo (2001): Menschwerdung. In: Frankfurter Rundschau Nr. 170 (25.07.2001), S. 8.
- [FR 28.7.01a] Frankfurter Rundschau (2001) (ohne Verfasser): Pharnalobby für Embryo Schutz. Industrie sieht keinen Standortnachteil durch Verbote. In: Frankfurter Rundschau Nr. 173 (28.07.2001), S. 1.
- [FR 28.7.01b] Frankfurter Rundschau (2001) (ohne Verfasser): Wenig glaubhaft. In: Frankfurter Rundschau Nr. 173 (28.07.2001), S. 3.
- [FR 30.7.01] Frankfurter Rundschau (2001) (ohne Verfasser): Menschenwürde konkretisiert sich beim Schreiben. In: Frankfurter Rundschau Nr. 174 (30.07.2001), S. 12.
- [FR 1.8.01] Schlüter, Christian (2001): Naturalisten, Kulturalisten. Die Bioethikdebatte in ihrem fortgeschrittenen Stadium. In: Frankfurter Rundschau Nr. 176 (01.08.2001), S. 17.
- [FR 2.8.01a] Frankfurter Rundschau (2001) (ohne Verfasser): Ausgeklont. In: Frankfurter Rundschau Nr. 177 (02.08.2001), S. 3.
- [FR 2.8.01b] Frankfurter Rundschau (2001) (ohne Verfasser): Lob für US-Votum gegen Klonen. In: Frankfurter Rundschau Nr. 177 (02.08.2001), S. 1.
- [FR 3.8.01a] Frankfurter Rundschau (2001) (ohne Verfasser): Wissenschaft. In: Frankfurter Rundschau Nr. 178 (03.08.2001), S. 5.
- [FR 3.8.01b] Sperber, Katharina (2001): Vom Klonverbot unberührt. Forschung an menschlichen Embryonen wird nicht behindert. In: Frankfurter Rundschau (03.08.2001), S. 5.
- [FR 3.8.01c] Löhle, Adolf (2001): Menschenwürde schützen. Leserbrief. In: Frankfurter Rundschau Nr. 178 (03.08.2001), S. 8.
- [FR 10.8.01] Frankfurter Rundschau (2001) (ohne Verfasser): Bush finanziert Gen-Forschung. In: Frankfurter Rundschau Nr. 184 (10.08.2001), S. 1.
- [FR 11.8.01a] Frankfurter Rundschau (2001) (ohne Verfasser): Kontrolle ist besser. In: Frankfurter Rundschau Nr. 185 (11.08.2001), S. 3.
- [FR 11.8.01b] Frankfurter Rundschau (2001) (ohne Verfasser): Lob für Bushs ‚Nachdenklichkeit‘. In: Frankfurter Rundschau Nr. 185 (11.08.2001), S. 5.

- [FR 11.8.01c] Ostermann, Dietmar (2001): Plötzlich vertritt Bush die Position, die er im Wahlkampf kritisiert hat. In: Frankfurter Rundschau Nr. 185 (11.08.2001), S. 1.
- [FR 13.8.01a] Emundts, Corinna (2001): Wie man geklonte Babys verhindert. In: Frankfurter Rundschau Nr. 186 (13.08.2001), S. 4.
- [FR 13.8.01b] Frankfurter Rundschau (2001) (ohne Verfasser): Gentechnik. In: Frankfurter Rundschau Nr. 186 (13.08.2001), S. 4.
- [FR 13.8.01c] Frankfurter Rundschau (2001) (ohne Verfasser): Voreilig. In: Frankfurter Rundschau Nr. 186 (13.08.2001), S. 3.
- [FR 14.8.01a] Karisch, Karl-Heinz (2001): Ethische Fragen sind immer radikal. In: Frankfurter Rundschau Nr. 187 (14.08.2001), S. 23.
- [FR 14.8.01b] Karisch, Karl-Heinz (2001): Vertreibung aus dem Paradies. In: Frankfurter Rundschau Nr. 187 (14.08.2001), S. 23.
- [FR 16.8.01a] Frankfurter Rundschau (2001) (ohne Verfasser): Bonner Universität: Offener Brief gegen Stammzellen-Projekt. In: Frankfurter Rundschau Nr. 189 (16.08.2001), S. 5.
- [FR 16.8.01b] Frankfurter Rundschau (2001) (ohne Verfasser): Forscher nutzen "Lager" von Stammzellen im Hirn. In: Frankfurter Rundschau Nr. 189 (16.08.2001), S. 38.
- [FR 21.8.01] Karisch, Karl-Heinz (2001): Weit gedacht. In: Frankfurter Rundschau Nr. 193 (21.08.2001), S. 23.
- [FR 27.8.01] Emmerich, Michael (2001): Erfolg facht alte Debatte neu an. In: Frankfurter Rundschau Nr. 198 (27.08.2001), S. 24.
- [FR 28.8.01a] Frankfurter Rundschau (2001) (ohne Verfasser): Einiges spricht für die Annahme des Talmud, dass Leben erst nach 40 Tagen im Mutterleib entsteht. In: Frankfurter Rundschau Nr. 198 (27.08.2001), S. 12.
- [FR 28.8.01b] Frankfurter Rundschau (2001) (ohne Verfasser): Fehlschluss. In: Frankfurter Rundschau Nr. 199 (28.08.2001), S. 25.
- [FR 28.8.01c] Ostermann, Dietmar (2001): Washington legt Liste mit 64 Stammzell-Linien vor. In: Frankfurter Rundschau Nr. 199 (28.08.2001), S. 2.
- [FR 3.9.01a] Emmerich, Michael (2001): „Kaum mehr als ein Dutzend Linien“. Bonner Stammzellforscher korrigiert US-Präsident Bush. In: Frankfurter Rundschau Nr. 204 (03.09.2001), S. 5.
- [FR 3.9.01b] Sperber, Katharina (2001): Jenseits von Eden, mitten in der Kirche. In: Frankfurter Rundschau Nr. 204 (03.09.2001), S. 3.
- [FR 8.9.01] Frankfurter Rundschau (2001) (ohne Verfasser): Gentechnik. DGB-Vorstand gegen Import von Stammzellen. In: Frankfurter Rundschau Nr. 209 (08.09.2001), S. 5.
- [FR 13.9.01a] Emundts, Corinna (2001): „Nur die Politik kann die Entscheidungen in der Gentechnik-Debatte treffen“. Interview mit Wolf-Michael Catenhusen (SPD), Parlamentarischer Staatssekretär im Bundesforschungsministerium. In: Frankfurter Rundschau Nr. 213 (13.09.2001), S. 10.
- [FR 13.9.01b] Frankfurter Rundschau (2001) (ohne Verfasser): Vage Hoffnung. In: Frankfurter Rundschau Nr. 213 (13.09.2001), S. 18.
- [FR 17.9.01] Frankfurter Rundschau (2001) (ohne Verfasser): Unterschiedliche Auffassung. In: Frankfurter Rundschau Nr. 216 (17.09.2001), S. 25.
- [FR 19.9.01] Frankfurter Rundschau (2001) (ohne Verfasser): An der Grenze zwischen Mensch und Tier. Experiment in China schockiert deutsche Forscher. In: Frankfurter Rundschau Nr. 218 (19.09.2001), S. 37.

- [FR 20.9.01] Maass, Harald (2001): China finanziert Kreuzung menschlicher Zellen mit denen von Tieren. In: Frankfurter Rundschau Nr. 219 (20.09.2001), S. 42.
- [FR 21.9.01] Frankfurter Rundschau (2001) (ohne Verfasser): Chef des Ethikrats will Gentechnik stärker fördern und kontrollieren. In: Frankfurter Rundschau Nr. 220 (21.09.2001), S. 1.
- [FR 22.9.01] Emmerich, Michael (2001): Die dritte Möglichkeit. Der Mediziner Geisler sieht in der Adoption eine Chance „überzählige Embryonen“ zu retten. In: Frankfurter Rundschau Nr. 221 (22.09.2001), S. 6.
- [FR 25.9.01] Rätz, Werner (2001): Ende der Humanität. In: Frankfurter Rundschau Nr. 223 (25.09.2001), S. 10.
- [FR 27.9.01] Emundts, Corinna (2001): Letzte Hürde Ethikrat. Im Bundestag offenbar Mehrheit für Stammzellen-Forschung. In: Frankfurter Rundschau Nr. 225 (27.09.2001), S. 6.
- [FR 26.10.01] Emundts, Corinna (2001): Doppeltes Spiel bei Fragen nach Leben und Tod. In: Frankfurter Rundschau Nr. 249 (26.10.2001), S. 5.
- [FR 31.10.01] Emundts, Corinna/Wagner, Wolfgang (2001): Ethikrat knüpft Stammzellen-Import an Bedingungen. In: Frankfurter Rundschau Nr. 253 (31.10.2001), S. 4.
- [FR 3.11.01] Frankfurter Rundschau (2001) (ohne Verfasser): Stammzellforschung. Fraktionen wollen DFG um Aufschub bitten. In: Frankfurter Rundschau Nr. 256 (03.11.2001), S. 6.
- [FR 12.11.01] Emundts, Corinna (2001): Volksverschaukelei. In: Frankfurter Rundschau Nr. 263 (12.11.2001), S. 3.
- [FR 13.11.01a] Frankfurter Rundschau (2001) (ohne Verfasser): Kein Votum zu Stammzellimport. In: Frankfurter Rundschau Nr. 264 (13.11.2001), S. 5.
- [FR 13.11.01b] Frankfurter Rundschau (2001) (ohne Verfasser): Keine Empfehlung zu Zellimport. In: Frankfurter Rundschau Nr. 264 (13.11.2001), S. 5.
- [FR 14.11.01] Emmerich, Michael (2001): Votum gegen Stammzellimport „ermutigt“ Politiker. In: Frankfurter Rundschau Nr. 265 (14.11.2001), S. 5.
- [FR 20.11.01] Emundts, Corinna (2001): Anklänge eines europäischen Stammzell-Projekts. In: Frankfurter Rundschau Nr. 270 (20.11.2001), S. 5.
- [FR 22.11.01] Arning, Matthias (2001): SPD-Delegierte spielen bei Stammzellen auf Zeit. In: Frankfurter Rundschau Nr. 272 (22.11.2001), S. 4.
- [FR 23.11.01] Frankfurter Rundschau (2001) (ohne Verfasser): Bioethik. DFG peilt Verschiebung des Votums zu Stammzellen an. In: Frankfurter Rundschau Nr. 273 (23.11.2001), S. 7.
- [FR 24.11.01a] Emmerich, Michael (2001): Biomedizin und die Ethik-Debatte. In: Frankfurter Rundschau Nr. 274 (24.11.2001), S. 5.
- [FR 24.11.01b] Frankfurter Rundschau (2001) (ohne Verfasser): DFG erwägt spätere Entscheidung. In: Frankfurter Rundschau Nr. 274 (24.11.2001), S. 4.
- [FR 24.11.01c] Frankfurter Rundschau (2001) (ohne Verfasser): Katholiken wollen Importverbot. In: Frankfurter Rundschau Nr. 274 (24.11.2001), S. 4.
- [FR 26.11.01a] Frankfurter Rundschau (2001) (ohne Verfasser): Bonner Forscher drängt die DFG. Brüstle will Zustimmung für Stammzellimport bis Jahresende. In: Frankfurter Rundschau Nr. 275 (26.11.2001), S. 1.
- [FR 26.11.01b] Frankfurter Rundschau (2001) (ohne Verfasser): Menschlicher Embryo geklont. In: Frankfurter Rundschau Nr. 275 (26.11.2001), S. 1.

- [FR 26.11.01c] Sperber, Katharina/Wagner, Wolfgang (2001): „Ich bin optimistisch, dass ich schon bald beginnen kann.“ Interview mit dem Bonner Neuropathologen Oliver Brüstle. In: Frankfurter Rundschau Nr. 275 (26.11.2001), S. 5.
- [FR 26.11.01d] Wunder, Michael (2001): Heilen statt Töten. In: Frankfurter Rundschau Nr. 275 (26.11.2001), S. 6.
- [FR 27.11.01a] Emmerich, Michael (2001): Ethische Schizophrenie. In: Frankfurter Rundschau Nr. 276 (27.11.2001), S. 3.
- [FR 27.11.01b] Emundts, Corinna, Ostermann, Dietmar (2001): Das Tabu in der Petrischale. In: Frankfurter Rundschau Nr. 276 (27.11.2001), S. 3.
- [FR 27.11.01c] Frankfurter Rundschau (2001) (ohne Verfasser): Klon-Versuch löst Empörung aus. In: Frankfurter Rundschau Nr. 276 (27.11.2001), S. 1.
- [FR 27.11.01d] Simm, Michael (2001): Neues Leben im Gehirn. In: Frankfurter Rundschau Nr. 276 (27.11.2001), S. 26.
- [FR 28.11.01a] Frankfurter Rundschau (2001) (ohne Verfasser): Enquete-Kommission lehnt therapeutisches Klonen ab. In: Frankfurter Rundschau Nr. 277 (28.11.2001), S. 5.
- [FR 28.11.01b] Frankfurter Rundschau (2001) (ohne Verfasser): Über den Status des Embryos gibt es zurzeit keinen Konsens. In: Frankfurter Rundschau Nr. 277 (28.11.2001), S. 9.
- [FR 29.11.01] Emundts, Corinna (2001): Die Gelehrten sind uneins. Ethikrat entscheidet über Stammzellimport. In: Frankfurter Rundschau Nr. 278 (29.11.2001), S. 5.
- [FR 30.11.01a] Frankfurter Rundschau (2001) (ohne Verfasser): Bulmahn lobt Ethikrat-Votum. In: Frankfurter Rundschau NR. 279 (30.11.2001), S. 4.
- [FR 30.11.01b] Emmerich, Michael (2001): Ethikrat für Stammzellen-Import. In: Frankfurter Rundschau Nr. 279 (30.11.2001), S. 1.
- [FR 01.12.01a] Emundts, Corinna (2001): Importieren, aber bitte kontrolliert. In: Frankfurter Rundschau Nr. 280 (01.12.2001), S. 4.
- [FR 1.12.01b] Frankfurter Rundschau (2001) (ohne Verfasser): „Jetzt sind wir genauso schlau wie vorher“ Interview mit Professorin Therese Neuer-Miebach. In: Frankfurter Rundschau Nr. 280 (01.12.2001), S. 4.
- [FR 3.12.01] Frankfurter Rundschau (2001) (ohne Verfasser): Verbot mit Ausnahmen gefordert. Politiker suchen nach Kompromiss bei Stammzell-Import. In: Frankfurter Rundschau Nr. 281 (03.12.2001), S. 4.
- [FR 5.12.01] Gamillscheg, Hannes (2001): Rat befürwortet Klonen. Schwedische Experten betonen Heilungschancen. In: Frankfurter Rundschau Nr. 283 (05.12.2001), S. 5.
- [FR 6.12.01a] Frankfurter Rundschau (2001) (ohne Verfasser): Andere Länder zur Besonnenheit gegenüber dem Rausch der Möglichkeiten auffordern. In: Frankfurter Rundschau Nr. 284 (06.12.2001), S. 8.
- [FR 6.12.01b] Frankfurter Rundschau (2001) (ohne Verfasser): Stammzell-Entscheidung wird wohl erneut vertagt. In: Frankfurter Rundschau Nr. 284 (06.12.2001), S. 5.
- [FR 7.12.01a] Edmundts, Corinna/Sperber, Katharina (2001): „Letztendlich braucht man gesetzliche Regelungen“. Interview mit Herta Däubler-Gmelin. In: Frankfurter Rundschau Nr. 285 (07.12.2001), S. 5.
- [FR 7.12.01b] Emmerich, Michael (2001): Ethik-Debatte im Abseits. In: Frankfurter Rundschau Nr. 285 (07.12.2001), S. 3.

- [FR 7.12.01c] Frankfurter Rundschau (2001) (ohne Verfasser): Justizministerium dringt auf gesetzliche Regelungen. In: Frankfurter Rundschau Nr. 285 (07.12.2001), S. 1.
- [FR 10.12.01] Kansteiner, Morten (2001): Menschenwürde? Eine Diskussion in Ahaus. In: Frankfurter Rundschau Nr. 287 (10.12.2001), S. 11.
- [FR 11.12.01] Mayer, Michael (2001): Scheibchenweise. Zur rechten Unzeit: über Klone und Nachrichten. In: Frankfurter Rundschau Nr. 288 (11.12.2001), S. 17.
- [FR 13.12.01] Frankfurter Rundschau (2001) (ohne Verfasser): Ethik-Kommission. Ärzte befürworten Import embryonaler Stammzellen. In: Frankfurter Rundschau Nr. 290 (13.12.2001), S. 290.
- [FR 18.12.01] Frankfurter Rundschau (2001) (ohne Verfasser): Embryonenforschung. Gegner des Zellen-Imports legen ihre Anträge vor. In: Frankfurter Rundschau Nr. 294 (18.12.2001), S. 4.
- [FR 20.12.01] Frankfurter Rundschau (2001) (ohne Verfasser): Gentechnik. Schmidt spricht sich für Stammzellen-Import aus. In: Frankfurter Rundschau Nr. 296 (20.12.2001), S. 4.
- [FR 28.12.01] Frankfurter Rundschau (2001) (ohne Verfasser): Biotechnik. Hintze plädiert für Import embryonaler Stammzellen. In: Frankfurter Rundschau Nr. 301 (28.12.2001), S. 4.
- [FR 31.12.01] Frankfurter Rundschau (2001) (ohne Verfasser): Genforschung. Bischof rät zu Moratorium bei Stammzellenimport. In: Frankfurter Rundschau Nr. 303 (31.12.2001), S. 4.
- [FR 7.1.02] Frankfurter Rundschau (2002) (ohne Verfasser): Ethikrat. Simitis warnt vor Profitgier bei Gentechnik. In: Frankfurter Rundschau Nr. 5 (07.01.2002), S. 4.
- [FR 10.1.02] Frankfurter Rundschau (2002) (ohne Verfasser): Bayerisches Gremium für Import. Kommission empfiehlt bei Stammzellen aber strenge Regeln. In: Frankfurter Rundschau Nr. 8 (10.01.2002), S. 4.
- [FR 11.1.02] Frankfurter Rundschau (2002) (ohne Verfasser): Biotechnik. Grüne legen sich bei Stammzellimport nicht fest. In: Frankfurter Rundschau Nr. 9 (11.01.2002), S. 5.
- [FR 14.1.02] Frankfurter Rundschau (2002) (ohne Verfasser): Bioethik. CDU-Abgeordnete bei Stammzellen-Votum frei. In: Frankfurter Rundschau Nr. 11 (14.01.2002), S. 4.
- [FR 15.1.02a] Denninger, Erhard (2002): Inflationärer Gebrauch des Begriffs „Menschenwürde“. Der Embryo und das Grundgesetz oder: unter welchen Bedingungen mit menschlichem Leben geforscht werden könnte. In: Frankfurter Rundschau Nr. 12 (15.01.2002), S. 7.
- [FR 15.1.02b] Hansen, Friedrich (2002): „Therapeutisches Klonen ist eine besondere Form der Organspende“. Genforscher Rudolph Jaenisch zur Stammzellen-Debatte. Interview. In: Frankfurter Rundschau Nr. 12 (15.01.2002), S. 24.
- [FR 15.1.02c] Hölscher, Astrid (2002): Schlüssel für ein „himbeerförmiges Gebilde“. In den Bitburger Gesprächen loteten Juristen aus, ob und wie die Forschung an Stammzellen möglich ist. In: Frankfurter Rundschau Nr. 12 (15.01.2002), S. 24.
- [FR 18.1.02] Frankfurter Rundschau (2002) (ohne Verfasser): Stammzellen-Import. Kirchen bitten Abgeordnete um Votum für Lebensschutz. In: Frankfurter Rundschau Nr. 15 (18.01.2002), S. 5.
- [FR 19.1.02] Frankfurter Rundschau (2002) (ohne Verfasser): Union sucht nach Position zum Stammzell-Import. Fraktionsvize Seehofer und Böhmer wollen enge Regelung nach US-Vorbild. Hintze formuliert Gegenantrag. In: Frankfurter Rundschau Nr. 16 (19.01.2002), S. 5.
- [FR 21.1.02a] Emundts, Corinna (2002): Stammzellen-Import. Abgeordnete ringen um Kompromiss. In: Frankfurter Rundschau Nr. 17 (21.01.2002), S. 7.
- [FR 21.1.02b] Frankfurter Rundschau (2002) (ohne Verfasser): Gentechnik. Simitis fordert Gesetz zu Stammzellen-Import. In: Frankfurter Rundschau Nr. 17 (21.01.2002), S. 1.

- [FR 22.1.02a] Emundts, Corinna (2002): Über Risiken eines Kompromisses. Union riskiert bei Stammzellen Krach mit katholischer Kirche. In: Frankfurter Rundschau Nr. 18 (22.01.2002), S. 4.
- [FR 22.1.02b] Frankfurter Rundschau (2002) (ohne Verfasser): Professor Ronald Mc Kay. Wir können nicht zehn Jahre warten. Interview mit Prof. Ronald McKay. In: Frankfurter Rundschau Nr. 18 (22.01.2002), S. 23.
- [FR 22.1.02c] Geisler, Linus S. (2002): Parlamentarier im Meer von Zweifeln. „Der Mensch kann sich über den Menschen nicht verständigen“. Vor der Entscheidung über Embryonenforschung. In: Frankfurter Rundschau Nr. 18 (22.01.2002), S. 14.
- [FR 22.1.02d] Simm, Michael (2002): Reparatur-Annahme Mensch. Wissenschaftler möchten die Erfolge mit embryonalen Stammzellen nun vom Tier auf die Humanmedizin übertragen. In: Frankfurter Rundschau Nr. 18 (22.01.2002), S. 23.
- [FR 23.1.02] Frankfurter Rundschau (2002) (ohne Verfasser): Stammzellen-Import. Unions-Abgeordnete favorisieren Verbot. In: Frankfurter Rundschau Nr. 19 (23.01.2002), S. 5.
- [FR 24.1.02] Emundts, Corinna (2002): Zahl der Importgegner wächst. Fraktionsübergreifende Anträge zu Stammzellen vereinbart. In: Frankfurter Rundschau Nr. 20 (24.01.2002), S. 4.
- [FR 25.1.02a] Frankfurter Rundschau (2002) (ohne Verfasser): Gentechnik. Vertreter von begrenztem Stammzellen-Import einig. In: Frankfurter Rundschau Nr. 21 (25.01.2002), S. 5.
- [FR 25.1.02b] Hebestreit, Steffen (2002): EU will Biotechnologie stärken. Aktionsplan soll Mangel an Fachkräften und Kapital beheben. In: Frankfurter Rundschau Nr. 21 (25.01.2002), S. 2.
- [FR 26.1.02a] Emundts, Corinna (2002): Anträge suchen „Wege aus Labyrinth“. Zwei Positionen zum Import embryonaler Stammzellen könnten die Mehrheit erreichen. In: Frankfurter Rundschau Nr. 22 (26.01.2002), S. 4.
- [FR 26.1.02b] Frankfurter Rundschau (2002) (ohne Verfasser): Wagner gegen Wagner. Streit um Gentechnik geht quer durch Regierung und Parteien. In: Frankfurter Rundschau Nr. 22 (26.01.2002), S. 35.
- [FR 26.1.02c] Schmidt, Kurt W. (2002): Konsequenz und Kompromiss. Zum Einfluss der Menschenbilder auf die ethische Beurteilung der Stammzellenforschung. In: Frankfurter Rundschau Nr. 22 (26.01.2002), S. 6.
- [FR 28.1.02a] Frankfurter Rundschau (2002) (ohne Verfasser): Biotechnologie. DFG liegen drei Anträge für Stammzell-Import vor. In: Frankfurter Rundschau Nr. 23 (28.01.2002), S. 1.
- [FR 28.1.02b] Sperber, Katharina (2002): Manchmal ist auch Reden Gold. In der Debatte um die Lebenswissenschaften hat Gerhard Schröder ein Ziel erreicht: Die Scheuklappen sind weg. In: Frankfurter Rundschau Nr. 23 (28.01.2002), S. 3.
- [FR 29.1.02a] Emmrich, Michael (2002): Das Prinzip Hoffnung. In Deutschland hat sich eine rege Forschung an Stammzellen etabliert. Der Weg zur Therapie ist noch lang. In: Frankfurter Rundschau Nr. 24 (29.01.2002), S. 23.
- [FR 29.1.02b] Emundts, Corinna/Wagner, Wolfgang (2002): Protestanten rufen zu Ablehnung des Stammzellimports auf. EKD-Ratsvorsitzender vermutet weitgehende Interessen hinter Gruppenantrag. Warnungen vor Dammbbruch. In: Frankfurter Rundschau Nr. 24 (29.01.2002), S. 4.
- [FR 29.1.02c] Frankfurter Rundschau (2002) (ohne Verfasser): Stammzellen-Forschung. 100 Millionen Euro für deutsche Projekte. In: Frankfurter Rundschau Nr. 24 (29.01.2002), S. 23.
- [FR 30.1.02a] Emundts, Corinna (2002): Zwei Persönlichkeiten - ein Befund. Nach langer Moderation empfehlen Margot von Renesse und Spiros Simitis den begrenzten Import von Stammzellen. In: Frankfurter Rundschau Nr. 25 (30.01.2002), S. 3.

- [FR 30.1.02b] Frankfurter Rundschau (2002) (ohne Verfasser): Stammzell-Import. Bundestag muss zwischen drei Varianten entscheiden. In: Frankfurter Rundschau Nr. 25 (30.01.2002), S. 1.
- [FR 30.1.02c] Siemens, Jochen (2002): Forschung und Ethik. In: Frankfurter Rundschau Nr. 25 (30.01.2002), S. 3.
- [FR 30.1.02d] Frankfurter Rundschau (2002) (ohne Verfasser): Konflikt zwischen Forschungsfreiheit und Menschenwürde. In: Frankfurter Rundschau Nr. 25 (30.01.2002), S. 7.
- [FR 31.1.02a] Emundts, Corinna (2002): Kollege Schröder und sein Kompromiss. Leise und nicht immer lebensnah debattiert der Bundestag über den Import von embryonalen Stammzellen. In: Frankfurter Rundschau Nr. 26 (31.01.2002), S. 3.
- [FR 31.1.02b] Frankfurter Rundschau (2002) (ohne Verfasser): „Import ausnahmsweise zulässig“. Bundestags-Beschluss zur Einfuhr embryonaler Stammzellen. In: Frankfurter Rundschau Nr. 26 (31.01.2002), S. 4.
- [FR 31.1.02c] Frankfurter Rundschau (2002) (ohne Verfasser): Embryonenschutzgesetz. In: Frankfurter Rundschau Nr. 26 (31.01.2002), S. 4.
- [FR 31.1.02d] Frankfurter Rundschau (2002) (ohne Verfasser): Internationale Vielfalt. Regelungen der Embryonen-Forschung in Europa und USA. In: Frankfurter Rundschau Nr. 26 (31.01.2002), S. 4.
- [FR 31.1.02e] Frankfurter Rundschau (2002) (ohne Verfasser): Kirchen geißeln Import-Entscheidung. Lehmann und Kock: „Uneingeschränkter Lebensschutz nicht mehr gewährleistet“. In: Frankfurter Rundschau Nr. 26 (31.01.2002), S. 4.
- [FR 31.1.02f] Hölscher, Astrid (2002): Auf gewundenen Pfaden. In: Frankfurter Rundschau Nr. 26 (31.01.2002), S. 3.
- [FR 31.1.02g] Pries, Knut (2002): Bundestag lässt Stammzellen-Import zu. Forschung unter strengen Auflagen gebilligt. Weder Totalverbot noch umfassende Freigabe. In: Frankfurter Rundschau Nr. 26 (31.01.2002), S. 1.
- [FR 31.1.02h] Sperber, Katharina (2002): Erleichtert über den Kompromiss. Neuropathologe Oliver Brüstle warnt aber vor Verschleppung. In: Frankfurter Rundschau Nr. 26 (31.01.2002), S. 4.

## **Mediendokumente des Wochenmagazins Der Spiegel**

- [Spiegel 48/98] Grolle, Johann (1998): Es gibt kein Halten mehr. In: Der Spiegel 48/1998, S. 272-276.
- [Spiegel 48/98] Klein, Stefan (1998): „Heuchlerische Empörung“. Professor Davor Solter über die Proteste gegen das Züchten menschlicher Stammzellen. Interview. In: Der Spiegel 48/1998, S. 274-275.
- [Spiegel 31/99] Der Spiegel (1999) (ohne Verfasser): Jungbrunnen fürs Gehirn. In: Der Spiegel Nr. 31/1999, S. 177.
- [Spiegel 26/00] von Bredow, Rafaela u.a. (2000): Die Gen-Revolution. In: Der Spiegel Nr. 26/2000, S. 78-90.
- [Spiegel 34/00] Martens, Heiko u.a. (2000): Die Menschen-Fabrik. In: Der Spiegel Nr. 34/2000, S. 22-25.
- [Spiegel 49/00] Noack, Hans-Joachim (2001): Bürgerkrieg um einen Winzling. In: Der Spiegel 49/2000, S. 139-141.
- [Spiegel 1/01a] Bethge, Philipp (2001): Werkstatt der Zellen. In: Der Spiegel 1/2001, S. 142-145.

- [Spiegel 1/01b] Der Spiegel (2001): Ungeist aus der Flasche. Spiegel-Gespräch mit Regine Kolk. In: Der Spiegel 1/2001, S. 146-147.
- [Spiegel 4/01] Der Spiegel (2001): Pflichten der Humanität. Interview mit Julian Nida-Rümelin. In: Der Spiegel 4/2001, S. 202-204.
- [Spiegel 5/01] Der Spiegel (2001): Aus der Luft gegriffen. Interview mit Norbert Hoerster. In: Der Spiegel 5/2001, S. 155.
- [Spiegel 12/01] Der Spiegel (2001) (ohne Verfasser): Beistand für die Gen-Wende. In: Der Spiegel 12/2001, S. 17.
- [Spiegel 19/01] Neffe, Jürgen (2001): Gestatten, was gestattet ist. In: Der Spiegel 19/2001, S. 240-241.
- [Spiegel 20/01] Bethge, Philipp u.a. (2001): Wir sind besser als Gott. In: Der Spiegel 20/2001, S. 240-252.
- [Spiegel 20/01] Der Spiegel (2001): Das ist Doppelmoral. Interview mit Edelgard Bulmahn. In: Der Spiegel 20/2001, 253-254.
- [Spiegel 24/01] Glotz, Peter (2001): Die neue Scholastik. In: Der Spiegel 24/2001, 42-44.
- [Spiegel 26/01] Grolle, Johann, Lakotta (2001): Heerscharen auf Eis. In: Der Spiegel 26/2001, S. 208-211.
- [Spiegel 27/01a] Ehmke, Horst (2001): Flucht ins Grundsätzliche? In: Der Spiegel 27/2001, S. 40-42.
- [Spiegel 27/01b] Kurbjuweit, Dirk (2001): Niemand kann sie stoppen. In: Der Spiegel 27/2001, S. 66-70.
- [Spiegel 28/01] Der Spiegel (2001): Ich warne vor Ungeduld. Interview mit Volker Herzog. In: Der Spiegel 28/2001, 178-179.
- [Spiegel 32/01] Evers, Marco u.a. (2001): Zukunft – aber welche? In: Der Spiegel 32/2001, S. 84- 87.
- [Spiegel 35/01] Blech, Jörg (2001): Menschenkeime im Säurebad. In: Der Spiegel 35/2001, 174-176.
- [Spiegel 36/01] Blech, Jörg/von Bredow, Rafaela (2001): Wundersames Wachstum. In: Der Spiegel 36/2001, 216-219.
- [Spiegel 42/01] Der Spiegel (2001) (ohne Verfasser): Kampf um Embryonen. In: Der Spiegel 42/2001, S. 276.
- [Spiegel 46/01] Kekulé, Alexander (2001): Menschenrecht auf Erbgut. In: Der Spiegel 46/2001, S. 206-207.
- [Spiegel 47/01] Bethge, Philipp u.a. (2001): Rüffel aus dem Parlament. In: Der Spiegel 47/2001, S. 234-235.
- [Spiegel 48/01] Der Spiegel (2001): Nicht alles Leben ist heilig. Spiegel-Gespräch mit Peter Singer. In: Der Spiegel 48/2001, S. 236- 242.
- [Spiegel 49/01a] Blech, Jörg u.a. (2001): Angst vor dem Dambruch. In: Der Spiegel 49/2001, S. 32.
- [Spiegel 49/01b] Blech, Jörg u.a. (2001): Klonen für die Unsterblichkeit. In: Der Spiegel 49/2001, S. 238-246.
- [Spiegel 50/01] Der Spiegel (2001): Auch die Pille ist künstlich. Interview mit Richard Schröder. In: Der Spiegel 50/2001, S. 228-230.
- [Spiegel 2/02] Blech, Jörg u.a. (2002): „Aldi-Kinder für die Armen“. Der Vorsitzende des Nationalen Ethikrats, Spiros Simitis, über die verführten Heilsversprechen der Stammzell-Forscher und das schädliche Profitstreben in der Wissenschaft. Interview. In: Der Spiegel Nr. 2/2002, S. 144-146.

[Spiegel 2/02] Der Spiegel (2002) (ohne Verfasser): Das Wunschkind. In: Der Spiegel Nr. 2/2002, S. 100-104.

[Spiegel 4/02] Pohland, Susanne (2002): Ohne Titel. Leserbrief. In: Der Spiegel Nr. 4/2002, S. 14.

[Spiegel 5/02] von Bredow, Rafaela u.a. (2002): Wann ist der Mensch ein Mensch? In: Der Spiegel Nr. 5/2002, S. 172-177.

## Mediendokumente der Süddeutschen Zeitung

[SZ 6.11.98] Wormer, Holger (1998): Embryonen von der Stange. Erstmals züchten Forscher im Labor menschliche Stammzellen. In: Süddeutsche Zeitung Nr. 256 (06.11.1998), S. 1.

[SZ 10.11.98] Koch, Klaus (1998): Kopf- an- Kopf- Rennen von Mensch und Tier. In: Süddeutsche Zeitung Nr. 259 (10.11.1998), S. V2/11.

[SZ 9.12.98] Süddeutsche Zeitung (ohne Verfasser) (1998): Experten: Klonforschung am Menschen fortsetzen. In: Süddeutsche Zeitung Nr. 284 (09.12.1998), S. 14.

[SZ 22.12.98] Urban, Martin (1998): Und die Moral von der Geschicht. In: Süddeutsche Zeitung Nr. 295 (22.12.1998), S. 4.

[SZ 29.12.98] Koch, Klaus (1998): Nachgefragt. Doch Klone von Menschen. Interview mit Prof. Dr. Dietmar Mieth. In: Süddeutsche Zeitung Nr. 299 (29.12.1998), S. V2/8.

[SZ 21.1.99] Süddeutsche Zeitung (ohne Verfasser) (1999): Wilmut will menschliche Embryonen klonen. In: Süddeutsche Zeitung Nr. 16 (21.01.1999), S. 2.

[SZ 26.1.99] Goldhahn, Sabine (1999): Blut entsteht aus Hirn. Möglicher Einsatz für Embryonenforschung. In: Süddeutsche Zeitung Nr. 20 (26.01.1999), S. V2/9.

[SZ 6.2.99] Reich, Jens (1999): Serie: Die Gegenwart der Zukunft, Nr. 5: Der Mensch baut sich um. In: Süddeutsche Zeitung Nr. 30 (06.02.1999), S. 1.

[SZ 20.3.99] Wormer, Holger (1999): Kleine Embryos im Genlabor. Deutsche Forschungsgemeinschaft gegen Lockerung vom Schutzgesetz. In: Süddeutsche Zeitung Nr. 66 (20.03.1999), S. 1.

[SZ 20.4.99] Süddeutsche Zeitung (ohne Verfasser) (1999): Forum Umwelt – Wissenschaft – Technik. Embryonen als Ersatzteillager? In: Süddeutsche Zeitung Nr. 90 (20.04.1999), S. L2.

[SZ 5.5.99] Thureau, Martin (1999): Streitfall Embryonenforschung. Interview mit Prof. Otmar Wiestler. In: Süddeutsche Zeitung Nr. 102 (05.05.1999), S. L21.

[SZ 11.5.99b] Bantle, Oliver (1999): „Das Gesetz wird bleiben“. Wolf-Michael Catenhusen verteidigt den Embryonen-Schutz. In: Süddeutsche Zeitung Nr. 107 (11.05.1999), S. 21.

[SZ 11.5.99c] Bantle, Oliver (1999): Embryonen – ein Rohstoff für die Wissenschaft. In: Süddeutsche Zeitung Nr. 107 (11.05.1999), S. 21.

[SZ 11.5.99d] Süddeutsche Zeitung (ohne Verfasser) (1999): Embryonen – ein Rohstoff für die Wissenschaft. In: Süddeutsche Zeitung Nr. 107 (11.05.1999), S. 21.

[SZ 11.5.99e] Wedlich, Susanne (1999): Die Forschung mit Stammzellen steht am Anfang. Wissenschaftler in den USA haben einen Vorsprung, obwohl der Staat sie lange Zeit finanziell nicht gefördert hat. In: Süddeutsche Zeitung Nr. 107 (11.05.1999), S. 21.

[SZ 1.6.99] Süddeutsche Zeitung (ohne Verfasser) (1999): Kommentar. Unheilvolles Klonen. In: Süddeutsche Zeitung Nr. 123 (01.06.1999), S. V2/10.

- [SZ 15.6.99] Wormer, Holger (1999): Nachgefragt. Menschen nach Maß? Interview mit Prof. Dr. Detlev Ganten. In: Süddeutsche Zeitung Nr. 134 (15.06.1999), S. V2/12.
- [SZ 30.11.99] Bartens, Werner (1999): Harnröhre auf Bestellung. In: Süddeutsche Zeitung Nr. 277 (30.11.1999), S. V2.
- [SZ 23.2.00] Berndt, Christina (2000): Herzen aus dem Labor. Die Firma, der das Patent gehört, will Menschen-Organen züchten. In: Süddeutsche Zeitung Nr. 44 (23.02.2000), S. 2.
- [SZ 7.3.00] Rögner, Wiebke (2000): Hilfe ohne Embryonen. Erwachsene Zellen im Test gegen Diabetes. In: Süddeutsche Zeitung Nr. 55 (07.03.2000), S. V2/13.
- [SZ 11.4.00] Süddeutsche Zeitung (2000) (ohne Verfasser): Embryonen freigegeben. Schweden erlaubt Stammzellzüchtung. In: Süddeutsche Zeitung Nr. 85 (11.04.2000), S. V2/17.
- [SZ 15.4.00] Stolze, Cornelia (2000): Der Streit um die Grenzen des Machbaren. Neue Erkenntnisse stellen das Embryonenschutzgesetz in Frage - doch dessen Lockerung birgt die Gefahr einer neuen Eugenik. In: Süddeutsche Zeitung Nr. 89 (15.04.2000), S. 13.
- [SZ 16.5.00] Brüser, Elke (2000): Prinzip Hoffnung. Trotz neuer Todesfälle, Misserfolge und ethischer Bedenken setzen Mediziner auf Gentherapie und Stammzellforschung. In: Süddeutsche Zeitung Nr. 112 (16.05.2000), S. V2/11.
- [SZ 6.6.00a] Will, Birgit (2000): Organe aus Hirnzellen. Alternative zu Material aus Embryonen. In: Süddeutsche Zeitung Nr. 129 (06.06.2000), S. V2/15.
- [SZ 6.6.00b] Wormer, Holger (2000): Embryonenforscher auf der Überholspur. Kommentar. In: Süddeutsche Zeitung Nr. 129 (06.06.2000), S. V2/16.
- [SZ 27.6.00] Berndt, Christina (2000): Doppelte Moral. Prof. Dr. Bärbel Friedrich, Berlin, Vizepräsidentin der DFG, über den Import menschlicher Embryozellen aus den USA. Interview. In: Süddeutsche Zeitung Nr. 145 (27.06.2000), S. V2/12.
- [SZ 16.8.00] Süddeutsche Zeitung (2000) (Ohne Verfasser): „London für Klonen von Embryo-Zellen“. In: Süddeutsche Zeitung Nr. 187 (16.08.2000), S. 7.
- [SZ 17.8.00a] Berndt, Christina (2000): Heilen durch Klonen. Es ist unmoralisch, Kranken wegen ohnehin todgeweihter Embryonen die Hilfe zu versagen. In: Süddeutsche Zeitung Nr. 188 (17.08.2000), S. 4.
- [SZ 17.8.00b] Süddeutsche Zeitung (2000) (Ohne Verfasser): Regierung will Verfahren für medizinische Zwecke erlauben. London für therapeutisches Klonen. Forscher sollen menschliche Embryo-Zellen kopieren dürfen. In: Süddeutsche Zeitung Nr. 188 (17.08.2000), S. 8.
- [SZ 18.8.00a] Süddeutsche Zeitung (2000) (Ohne Verfasser): Nach der Entscheidung in Großbritannien. Klonen von Embryo-Zellen stößt auf Ablehnung. Gesundheitsministerin Fischer befürchtet große Gefahren. Ethikexperten aller Parteien warnen vor Missbrauch. In: Süddeutsche Zeitung Nr. 189 (18.08.2000), S. 5.
- [SZ 18.8.00b] Wormer, Holger (2000) (Interview): Der Präsident der Deutschen Forschungsgemeinschaft lehnt Experimente mit Embryonen derzeit ab. „Auf Heilsversprechen lasse ich mich nicht ein“. Interview mit Ernst Ludwig Winnacker. In: Süddeutsche Zeitung Nr. 189, (18.08.2000), S. 8.
- [SZ 24.8.00a] Wormer, Holger (2000): Die Stunde der Krachmacher. In: Süddeutsche Zeitung Nr. 194 (24.08.2000), S. 4.
- [SZ 24.8.00b] Wormer, Holger (2000): Vorstoß der US-Regierung. Washington will Klonen erleichtern. Zustimmung der Kongresse gilt jedoch als unwahrscheinlich. In: Süddeutsche Zeitung Nr. 194 (24.08.2000), S. 1.

- [SZ 31.8.00] Burtscheidt Christine u.a. (2000): Campus München: SZ-Gespräch über die Zulässigkeit des therapeutischen Klonens. Die Konfliktberatung. Interview. In: Süddeutsche Zeitung Nr. 200 (31.08.2000), S. 5.
- [SZ 8.9.00] Wormer, Holger (2000): Britischer Forscherwahn. In: Süddeutsche Zeitung Nr. 207 (08.09.2000), S. 4.
- [SZ 12.9.00] Berndt, Christina (2000): Der Segen aus der Retorte. Was der britische Wissenschaftsminister über BSE, Klonen und den Rückzug seiner Supermarktkette vom Geschäft mit dem Genfood denkt. Interview. In: Süddeutsche Zeitung Nr. 210 (12.09.2000), S. V2/10.
- [SZ 9.10.00] Burtscheidt, Christine (2000): Wie schützenswert sind embryonale Zellen? CSU streitet um therapeutisches Klonen - Abgeordneter Söder contra Barbara Stamm. In: Süddeutsche Zeitung Nr. 232 (09.10.2000), S. 2.
- [SZ 5.12.00] Koch, Klaus (2000): Nerven aus Blut. Forscher räumen ein, dass sie Alternativen für die Forschung mit Embryozellen lange Zeit unterschätzt haben. In: Süddeutsche Zeitung Nr. 280 (05.12.2000), S. V2/9.
- [SZ 19.12.00] Driessen, Christoph (2000): „Der bequemste Weg in die Hölle“. In Großbritannien kämpft eine Minderheit gegen therapeutisches Klonen - doch das Unterhaus wird es wahrscheinlich erlauben. In: Süddeutsche Zeitung Nr. 292 (19.12.2000), S. 8.
- [SZ 20.12.00] Süddeutsche Zeitung (2000) (ohne Verfasser): „Freigabe des Klonens ist schrecklicher Betrug“. In: Süddeutsche Zeitung Nr. 293 (20.12.2000), S. 2.
- [SZ 21.12.00a] Berndt, Christina (2000): Herzen aus dem Reagenzglas. Geklonte Embryozellen sollen menschliche Gewebe und Organe ersetzen. In: Süddeutsche Zeitung Nr. 294 (21.12.2000), S. 2.
- [SZ 21.12.00b] Graupner, Heidrun (2000): „Eine Art Kannibalismus“. Reaktionen aus Deutschland. In: Süddeutsche Zeitung Nr. 294 (21.12.2000), S. 2.
- [SZ 21.12.00c] Koch, Klaus (2000): Erwachsene statt Embryos. Wissenschaftler suchen nach Alternativen zur Therapie mit geklonten Zellen. In: Süddeutsche Zeitung Nr. 294 (21.12.2000), S. 2.
- [SZ 21.12.00d] Wormer, Holger (2000): Klonen ohne Grenzen? In: Süddeutsche Zeitung Nr. 294 (21.12.2000), S. 4.
- [SZ 21.12.00e] Süddeutsche Zeitung (2000) (ohne Verfasser): Debatte über Klonen von Embryos. Schröder gegen „grundsätzliche Verbote“. In: Süddeutsche Zeitung Nr. 294 (21.12.2000), S. 1.
- [SZ 21.12.00f] Zitzelsberger, Gert (2000): Es gibt kein Zurück. Oberhaus kann Gesetz nicht kippen. In: Süddeutsche Zeitung Nr. 294 (21.12.2000), S. 2.
- [SZ 22.12.00a] Benecke, Mark (2000): Leistung muss sich klonen. Was der britische Beschluss für uns bedeutet. In: Süddeutsche Zeitung Nr. 295 (22.12.2000), S. 15.
- [SZ 22.12.00b] Süddeutsche Zeitung (2000) (ohne Verfasser): Kritik am britischen Gentechnik-Gesetz. „Sieg des Kommerzes über die Ethik“. Arztpräsident hält therapeutisches Klonen für bedenklich. In: Süddeutsche Zeitung Nr. 295 (22.12.2000), S. 6.
- [SZ 27.12.00] Süddeutsche Zeitung (2000) (ohne Verfasser): Appelle der großen Kirchen zu Weihnachten. Bischöfe lehnen Klonen von Embryozellen ab. In: Süddeutsche Zeitung Nr. 297 (27.12.2000), S. 6.
- [SZ 28.12.00] Süddeutsche Zeitung (2000) (ohne Verfasser): Union für gesetzliches Menschen-Klon-Verbot. In: Süddeutsche Zeitung Nr. 298 (28.12.2000), S. 6.
- [SZ 29.12.00] Süddeutsche Zeitung (2000) (ohne Verfasser): Merkel: CDU muss stärker an sich glauben. In: Süddeutsche Zeitung Nr. 299 (29.12.2000), S. 2.

- [SZ 2.1.01] Charisius, Hanno (2001): Im Labor spezialisiert. Zucht von Stammzellen weiterentwickelt. In: Süddeutsche Zeitung Nr. 1 (02.01.2001), S. V2/11.
- [SZ 9.1.01] Eichberger, Tassilo (2001): Verharmlosungsbedürfnis. Zur Menschenwürde der Embryos: Erwiderung auf Nida-Rümelin. In: Süddeutsche Zeitung Nr. 6 (09.01.2001), S. 17.
- [SZ 12.1.01a] Maier-Albang, Monika (2001): Kirche empört über Nida-Rümelin. In: Süddeutsche Zeitung Nr. 9 (12.01.2001), S. 6.
- [SZ 12.1.01b] Reents, Edo (2001): Aussichten eines Klons. Der Geist Nida-Rümelins entdeckt das Leben – und die Moral? In: Süddeutsche Zeitung Nr. 9 (12.01.2001), S. 13.
- [SZ 17.1.01a] Hoffmann, Andreas/Schlötzer, Christiane (2001): Kurswechsel in der Biomedizin. Die neue Führung des Gesundheitsministeriums will die bisherige restriktive Haltung lockern. In: Süddeutsche Zeitung Nr. 13 (17.01.2001), S. 2.
- [SZ 17.1.01b] Wormer, Holger (2001): Gentechnik. Embryonen als Ersatzteillager. Viele biomedizinische Verfahren sind in der rot-grünen Koalition umstritten. In: Süddeutsche Zeitung Nr. 13 (17.01.2001), S. 2.
- [SZ 24.1.01a] Hoffmann, Andreas/Leyendecker, Hans (2001): SZ Interview mit Gesundheitsministerin Ulla Schmidt: „Finanzlage der Krankenkassen sieht gut aus“. In: Süddeutsche Zeitung Nr. 19 (24.01.2001), S. 7.
- [SZ 24.1.01b] Wormer, Holger (2001): Nach dem Unterhaus stimmt auch das Oberhaus zu. Großbritannien erlaubt Klonen für die Forschung. In: Süddeutsche Zeitung Nr. 19 (24.01.2001), S. 8.
- [SZ 2.2.01] Süddeutsche Zeitung (ohne Verfasser) (2001): Buhlmann fordert Debatte über Gentechnologie. In: Süddeutsche Zeitung Nr. 27 (02.02.2001), S. 6.
- [SZ 3.2.01] Nida-Rümelin, Julian (2001): Humanismus ist nicht teilbar. Die ethischen Gründe für die Schutzwürdigkeit des Embryos gehen nicht im Begriff der Menschenwürde auf. In: Süddeutsche Zeitung Nr. 28 (03.02.2001), S. 17.
- [SZ 10.2.01] Reents, Edo (2001): Im Reagenztheater. Die Debatte um das Klonen hat rein hypothetischen Charakter. In: Süddeutsche Zeitung Nr. 34 (10.02.2001), S. 17.
- [SZ 16.2.01a] Clement, Sengewald, Anette (2001): Vielen Patienten ist Hilfe verwehrt. Leserbrief. In: Süddeutsche Zeitung Nr. 39 (16.02.2001), S. 11.
- [SZ 16.2.01b] Koch, Klaus (2001): Noten und Notizen. Für eine menschliche Welt voller Klone. In: Süddeutsche Zeitung Nr. 39 (16.02.2001), S. 14.
- [SZ 17.2.01] Orzessek, Arno (2001): Genom sei der Herr. Züchten, ordnen, Gesetze machen: Eine Tagung zum Thema der Stunde. In: Süddeutsche Zeitung Nr. 40 (17.02.2001), S. 20.
- [SZ 9.3.01a] Beck, Sebastian (2001): „Es gibt mehr Berührungspunkte mit den Grünen als früher“ Der CSU-Fraktionsvorsitzende Glück will in der Gentechnik die Moral über Milliardengeschäfte stellen. Interview mit dem CSU-Fraktionsvorsitzenden Alois Glück. In: Süddeutsche Zeitung Nr. 57 (09.03.2001), S. 53.
- [SZ 9.3.01b] Maier-Albang, Monika (2001): Kirche warnt vor Missbrauch der Gentechnik. Lehmann betont den Wert des menschlichen Lebens. In: Süddeutsche Zeitung Nr. 57 (09.03.2001), S. 8.
- [SZ 9.3.01c] Süddeutsche Zeitung (ohne Verfasser) (2001): Frühjahrsversammlung der Deutschen Bischofskonferenz. Kirche warnt vor Missbrauch der Gentechnik. Test an Embryonen aus dem Reagenzglas abgelehnt. In: Süddeutsche Zeitung Nr. 57 (09.03.2001), S. 8.
- [SZ 9.3.01d] Wormer, Holger (2001): „Ein Mensch ist mehr als die Summe seiner Gene“. Zur Lage der Reproduktionsmedizin: Ein Gespräch mit dem Münchener Molekularbiologen Eckhard Wolf. In: Süddeutsche Zeitung Nr. 57 (09.03.2001), S. 16.

- [SZ 14.3.01] Orzessek, Arno (2001): Tun sie es? Ein Berliner Gespräch über das Klonen und die Angst davor. In: Süddeutsche Zeitung Nr. 61 (14.03.2001), S. 18.
- [SZ 27.3.01] Koch, Klaus (2001): An den Grenzen der Hoffnung. Nach zwei gescheiterten Studien mit Embryo-Zellen kritisieren europäische Parkinson-Forscher ihre US-Kollegen als voreilig. In: Süddeutsche Zeitung Nr. 72 (27.03.2001), S. V2/9.
- [SZ 17.4.01a] Duggen, Sonja (2001): Nachgefragt: Späte Forschung für häufige Leiden? Prof. Dr. Dietmar Vestweber, Direktor des neuen Max-Planck-Instituts für vaskuläre Biologie in Münster über seine Pläne. In: Süddeutsche Zeitung Nr. 88 (17.04.2001), S. V2/18.
- [SZ 17.4.01b] Koch, Klaus (2001): Stammzellen aus Fett. Hoffnung auf neue Quellen für Therapien. In: Süddeutsche Zeitung Nr. 88 (17.04.2001), S. V2/17.
- [SZ 2.5.01] Orzessek, Arno (2001): Sandhaufen und Zellhaufen. „Der Mensch von Morgen“ ist der von heute: Ein Symposium in Heidelberg. In: Süddeutsche Zeitung Nr. 100 (02.05.2001), S. 20.
- [SZ 3.5.01] Wormer, Holger (2001): Gatersleben in Sachsen-Anhalt: Stammzellen aus dem Labor oder der Widerspenstigen Zähmung. Ein Herzschlag voller Zukunft. In: Süddeutsche Zeitung Nr. 101 (03.05.2001), S. 3.
- [SZ 4.5.01] Süddeutsche Zeitung (ohne Verfasser) (2001): Experten für Arbeit mit Embryo-Stammzellen. In: Süddeutsche Zeitung Nr. 102 (04.05.2001), S. 5.
- [SZ 5.5.01a] Koch, Klaus (2001): „Es ist ein weiter Schritt vom Tierexperiment zum Menschen“. Interview mit dem Neuropathologen Oliver Brüstle. In: Süddeutsche Zeitung Nr. 103 (05.05.2001), S. 6.
- [SZ 5.5.01b] Koch, Klaus (2001): Embryonenforschung: Experten befürworten Arbeit mit embryonalen Stammzellen. Kehrtwende in zwei Etappen. Die Hoffnung, unheilbar Kranken zu helfen, rechtfertigt nach Ansicht der DFG die Lockerung des Embryonenschutzes. In: Süddeutsche Zeitung Nr. 103 (05.05.2001), S. 6.
- [SZ 5.5.01c] Koch, Klaus (2001): Überbleibsel aus dem Reagenzglas. Die Empfehlungen zur Embryonenforschung sind durchdacht und vergeben dennoch eine Chance. In: Süddeutsche Zeitung Nr. 103 (05.05.2001), S. 4.
- [SZ 5.5.01d] Süddeutsche Zeitung (ohne Verfasser) (2001): Bischöfe: Embryonen haben ein Lebensrecht. Süddeutsche Zeitung Nr. 103 (05.05.2001), S. 6.
- [SZ 5.5.01e] Süddeutsche Zeitung (ohne Verfasser) (2001): CDU warnt vor Verletzung des „höchsten Tabus“. In: Süddeutsche Zeitung Nr. 103 (05.05.2001), S. 6.
- [SZ 5.5.01f] Süddeutsche Zeitung (ohne Verfasser) (2001): Meilensteine der Stammzell-Forschung. In: Süddeutsche Zeitung Nr. 103 (05.05.2001), S. 6.
- [SZ 7.5.01] Süddeutsche Zeitung (ohne Verfasser) (2001): Vorstoß der Deutschen Forschungsgemeinschaft. Kirchen warnen vor Lockerung des Embryonenschutzes. In: Süddeutsche Zeitung Nr. 104 (07.05.2001), S. 6.
- [SZ 8.5.01a] Koch, Klaus (2001): Stammzelle aus Leichen. Neue Alternative zur Embryonenforschung. In: Süddeutsche Zeitung Nr. 105 (08.05.2001), S. V2/15.
- [SZ 8.5.01b] Mayer, Christian (2001): Biotech-Unternehmen. Ein qualitativer Sprung nach vorn. Deutschland stärkt Position in Europa/Technologischer Abstand zu US- Marktführern bleibt groß. In: Süddeutsche Zeitung Nr. 105 (08.05.2001), S. 22.
- [SZ 8.5.01c] Süddeutsche Zeitung (ohne Verfasser) (2001): Däubler-Gmelin gegen Embryonenforschung. In: Süddeutsche Zeitung Nr. 105 (08.05.2001), S. 7.

- [SZ 9.5.01a] Fried, Nico (2001): Justiz- und Forschungsministerin uneins. Kontroverse im Kabinett über die Embryonenforschung. Bulmahn bestätigt Differenzen mit Däubler-Gmelin über künftige Möglichkeiten der Präimplantationsdiagnostik. In: Süddeutsche Zeitung Nr. 106 (09.05.2001), S.6.
- [SZ 9.5.01b] Süddeutsche Zeitung (ohne Verfasser) (2001): Ministerin Bulmahn legt Positionspapier vor. Kontroverse im Kabinett über die Embryonenforschung. Chancen für Wirtschaft und Forschung betont. In: Süddeutsche Zeitung Nr. 106 (09.05.2001), S. 6.
- [SZ 10.5.01] Fried, Nico (2001): Komplikationen in der Embryonalphase. Im Konflikt zwischen Justiz- und Forschungsministerin geht es auch darum, worüber der neue Ethikrat überhaupt reden soll. In: Süddeutsche Zeitung Nr. 107 (10.05.2001), S. 5.
- [SZ 12.5.01a] Graupner, Heidrun (2001): SZ-Interview mit der Bundesjustizministerin: „Die Forschungsfreiheit ist nicht grenzenlos“. In: Süddeutsche Zeitung Nr. 109 (12.05.2001), S. 8.
- [SZ 12.5.01b] Süddeutsche Zeitung (ohne Verfasser) (2001): Der Mutterstand der Dinde. Mütter werden eine Frage der Technik sein. In: Süddeutsche Zeitung Nr. 109 (12.05.2001), S. 14.
- [SZ 14.5.01] Süddeutsche Zeitung (ohne Verfasser) (2001): Grünes Konzept gegen Embryonenforschung. In: Süddeutsche Zeitung Nr. 7 (14.05.2001), S. 7.
- [SZ 15.5.01] Fried, Nico (2001): Enquete-Kommission pocht auf Kompetenzen. Unmut über nationalen Ethikrat. In: Süddeutsche Zeitung Nr. 111 (15.05.2001), S. 6.
- [SZ 16.5.01a] Drobinski, Matthias (2001): Schröder beruft den Moraltheologen Schockenhoff. „Lehmann setzt Nachnominierung für Ethikrat durch“. Vorsitzender der Bischofskonferenz soll mit Rückzug der katholischen Kirche aus dem Gremium gedroht haben. In: Süddeutsche Zeitung Nr. 112 (16.05.2001), S. 6.
- [SZ 16.5.01b] Süddeutsche Zeitung (ohne Verfasser) (2001): Grüne für klare Grenzen bei der Gentechnik. In: Süddeutsche Zeitung Nr. 112 (16.05.2001), S. 6.
- [SZ 16.5.01c] Süddeutsche Zeitung (2001): Das Tor zur Selektion ist geöffnet. Interview mit Ernst-Wolfgang Böckenförde. In: Süddeutsche Zeitung Nr. 112 (16.05.2001), S. 11.
- [SZ 19.5.01a] Rubner, Jeanne (2001): Eine Mahnung für den Kanzler. Mit seiner großen Rede zur Gentechnik hat der Bundespräsident wichtige Akzente gesetzt. In: Süddeutsche Zeitung Nr. 115 (19.05.2001), S. 4.
- [SZ 19.5.01b] Süddeutsche Zeitung (ohne Verfasser) (2001): „Berliner Rede“ zu Gentechnik und Biomedizin. Rau zeigt Forschern Grenzen auf. In: Süddeutsche Zeitung Nr. 115 (19.05.2001), S. 1.
- [SZ 21.5.01] Graupner, Heidrun (2001): Die Menschenwürde ist unantastbar...sagt der Bundespräsident, und der Bundeskanzler spricht von Schlüsselindustrie Gentechnik. In: Süddeutsche Zeitung Nr. 116 (21.05.2001), S. 4.
- [SZ 22.5.01a] Süddeutsche Zeitung (ohne Verfasser) (2001): Heftige Debatte über die Biomedizin. Gentechnik entzweit die Sozialdemokraten. Ministerin Bulmahn wie Schröder „gegen Grenzen“. Müntefering und CDU loben Rau. In: Süddeutsche Zeitung Nr. 117 (22.05.2001), S. 1.
- [SZ 22.5.01b] Süddeutsche Zeitung (Ohne Verfasser) (2001): Nichts ist so gesund wie das Wachstum. In: Süddeutsche Zeitung Nr. 117 (22.05.2001), S. 4.
- [SZ 23.5.01a] Beck, Sebastian (2001): Im Zweifel für das Nein. CSU-Fraktionschef Glück warnt bei der Biotechnik vor „naiver Fortschrittsgläubigkeit“ und kritisiert die CDU. In: Süddeutsche Zeitung Nr. 118 (23.05.2001), S. 59.
- [SZ 23.5.01b] Graff, Bernd (2001): Wo bist du geblieben, mein blauäugiger Sohn. Gentechnik und Moral: Johannes Rau hat Recht – und zielt doch an der Wirklichkeit vorbei. In: Süddeutsche Zeitung Nr. 118 (23.05.2001), S. 18.

- [SZ 23.5.01c] Süddeutsche Zeitung (ohne Verfasser) (2001): EKD für absoluten Embryonenschutz. In: Süddeutsche Zeitung Nr. 118 (23.05.2001), S. 5.
- [SZ 25.5.01a] Graupner, Heidrun (2001): Ärzte lehnen Forschung an Embryonen ab. In: Süddeutsche Zeitung Nr. 119 (25.05.2001), S. 2.
- [SZ 25.5.01b] Kerschner, Helmut (2001): Karlsruher Verfassungsgespräch über Stammzellenforschung und Präimplantationsdiagnostik. Von Wert und Würde der Eingefrorenen. Juristen und Wissenschaftler, Bischöfe und Philosophen debattierten über ein „sehr reales Dilemma“ der Genforschung. In: Süddeutsche Zeitung Nr. 119 (25.05.2001), S. 10.
- [SZ 26.5.01a] Graupner, Heidrun (2001): Der ganz andere Ärztetag. Nazizeit, Biomedizin, Ausbeutung in den Kliniken: Deutliche Signale aus Ludwigshafen. In: Süddeutsche Zeitung Nr. 120 (26.05.2001), S. 4.
- [SZ 26.5.01b] Süddeutsche Zeitung (ohne Verfasser) (2001): Anwälte setzen sich für Embryonen ein. In: Süddeutsche Zeitung Nr. (26.05.2001), S. 5.
- [SZ 30.5.01a] Engels, Eve-Marie (2001): Rette, wer kann. In: Süddeutsche Zeitung Nr. 123 (30.05.2001), S. 19.
- [SZ 30.5.01b] Graff, Bernd (2001): Keimbahn frei! Die deutsche Debatte und der Mythos vom Gen. In: Süddeutsche Zeitung Nr. 123 (30.05.2001), S. 17.
- [SZ 30.5.01c] Schöne-Seifert, Bettina (2001): Unter sensiblen Menschen. In: Süddeutsche Zeitung Nr. 123 (30.05.2001), S. 19.
- [SZ 31.5.01] Kaufmann, Arthur (2001): Was der Mensch dem Menschen schuldet. In: Süddeutsche Zeitung Nr. 124 (31.05.2001), S. 19.
- [SZ 1.6.01a] Fried, Nico (2001): Grundsatzdebatte im Bundestag über die Gentechnik. Schröder für begrenzte Embryonen-Forschung. „Auch für die Präimplantationsdiagnostik gibt es Gründe, die achtbar sind“. In: Süddeutsche Zeitung Nr. 125 (01.06.2001), S. 1.
- [SZ 1.6.01b] Graupner, Heidrun (2001): Ethik im Reagenzglas. In: Süddeutsche Zeitung Nr. 125 (01.06.2001), S. 4.
- [SZ 1.6.01c] Hoffmann, Andreas (2001): Von Wert und Würde des Menschen: Warum die Gen-Debatte im Bundestag ein großer Tag des Parlaments war. In: Süddeutsche Zeitung Nr. 125 (01.06.2001), S. 6.
- [SZ 1.6.01d] Schwennicke, Christoph (2001): „Das Fenster ist offen“. Wolfgang Clement setzt in Israel auf Embryonenforschung. In: Süddeutsche Zeitung Nr. 125 (01.06.2001), S. 7.
- [SZ 2.6.01a] Bollinger, Jürgen (2001): Der Mensch verliert seine Gottähnlichkeit. Leserbrief. In: Süddeutsche Zeitung Nr. 126 (02.06.2001), S. 46.
- [SZ 2.6.01b] Gierstorfer, Carl (2001): Falsche Erwartungen und falsche Ängste. Die Einstellung der Briten zur Biotechnik ist so pragmatisch wie illusionslos: Ein Interview mit dem britischen Genforscher Steve Jones. In: Süddeutsche Zeitung Nr. 126 (02.06.2001), S. 14.
- [SZ 2.6.01c] Graupner, Heidrun (2001): Gefährliches Spiel mit der Gesetzeslücke. Gentechnik: Clement schafft Fakten, ohne die Entscheidung des Bundestages abzuwarten. In: Süddeutsche Zeitung Nr. 126 (02.06.2001), S. 4.
- [SZ 2.6.01d] Süddeutsche Zeitung (ohne Verfasser) (2001): Kritik an Clements Plan zur Genforschung. In: Süddeutsche Zeitung Nr. 126 (02.06.2001), S. 5.
- [SZ 3.6.01] Graff, Bernd (2001): Die Abgeordneten unter der Bundeskuppel – ratlos. Nicht nur die Politiker verlieren sich bei der Debatte um die Gentechnologie immer mehr in Halbherzigkeiten. In: Süddeutsche Zeitung Nr. 126 (03.06.2001), S. 14.

- [SZ 5.6.01a] Schwennicke, Christoph (2001): Forschung an embryonalen Stammzellen. Clement löst heftigen Unmut in der SPD aus. In: Süddeutsche Zeitung Nr. 127 (05.06.2001), S. 1.
- [SZ 5.6.01b] Süddeutsche Zeitung (ohne Verfasser) (2001): SZ-Interview mit dem Ministerpräsidenten. „Deutsche Debatte weltfremd“. Wolfgang Clement verteidigt seine Haltung zur Gentechnik. In: Süddeutsche Zeitung Nr. 127 (05.06.2001), S. 6.
- [SZ 5.6.01c] Wilkes, Johannes (2001): Moralische Bedenken zurückgestellt. Leserbrief. In: Süddeutsche Zeitung Nr. 127 (05.06.2001), S. 22.
- [SZ 6.6.01a] Berndt, Christina (2001): Zwischen Glaube und Wissenschaft. Embryonenforschung in Israel. In: Süddeutsche Zeitung Nr. 128 (06.06.2001), S. 2.
- [SZ 6.6.01b] Piper, Nikolaus (2001): Ökonomie der Moral. In: Süddeutsche Zeitung Nr. 128 (06.06.2001), S. 4.
- [SZ 6.6.01c] Wormer, Holger (2001): Mut zur Lücke. Trotz der Kritik wollen Bonner Forscher rechtliche Unklarheit zum Import von Embryo-Zellen nutzen. In: Süddeutsche Zeitung Nr. 128 (06.06.2001), S. 2.
- [SZ 9.6.01] Hoffmann, Andreas (2001): Erste Sitzung des Beratergremiums. Schröder nimmt Ethikrat in Schutz. „Die pauschale Diffamierung ist enttäuschend“. Bundeskanzler gegen rasche Gesetzesänderung. In: Süddeutsche Zeitung Nr. 131 (09.06.2001), S. 5.
- [SZ 10.6.01] Finetti, Marco (2001): Forschung mit embryonalen Stammzellen. Bonner Forscher stoßen an eigener Universität auf Kritik. Wissenschaftler mehrerer Fachgebiete lehnen Pläne ab. Rektor stellt sich hinter die umstrittenen Mediziner. In: Süddeutsche Zeitung Nr. 156 (10.06.2001), S. 6.
- [SZ 11.6.01a] Heims, Hans-Jörg (2001): Ministerpräsident verteidigt seine umstrittene Position. Clement: Genforschung ist Gebot der Nächstenliebe. „Dieser christliche Grundsatz verbietet es, die Ethik des Heilens außer Acht zu lassen“. In: Süddeutsche Zeitung Nr. 132 (11.06.2001), S. 5.
- [SZ 11.6.01b] Wormer, Holger (2001): Zwei Forscher fühlen sich unwohl in der Rolle der bösen Buben von Bonn: „Es wäre falsch, das Verbotsschild an die Tür zu hängen“. Die Ärzte Otmar Wiestler und Oliver Brüstle sind wegen ihrer Stammzellforschung in politische Stürme geraten – und halten dagegen. In: Süddeutsche Zeitung Nr. 132 (11.06.2001), S. 3.
- [SZ 13.6.01] Drobinski, Matthias (2001): „Die Kirche ist nicht fortschrittsfeindlich“ Der evangelische Landesbischof von Berlin und Brandenburg, Wolfgang Huber, sagt aber zugleich: Heilen heiligt nicht jedes Mittel. Ein Interview mit Wolfgang Huber. In: Süddeutsche Zeitung Nr. 134 (13.06.2001), S. 14.
- [SZ 18.6.01a] Drobinski, Matthias/Heims, Hans-Jörg (2001): Genosse Ketzer geht durchs Fegefeuer. Wie Nordrhein-Westfalens Ministerpräsident Clement die Chance ergriff, seine Thesen zur Gentechnik auf dem Kirchentag zu verteidigen. In: Süddeutsche Zeitung Nr. 137 (18.06.2001), S. 3.
- [SZ 18.6.01b] Heims, Hans-Jörg (2001): Differenzen auf den Kirchentag. SPD streitet über Haltung zur Genforschung. Clement spricht sich abermals für Import von embryonalen Stammzellen aus. Justizministerin warnt vor Tabubruch. In: Süddeutsche Zeitung Nr. 137 (18.06.2001), S. 5.
- [SZ 20.6.01] Heims, Hans-Jörg/Schwennicke, Christoph (2001): Genetische Verspannungen. In der Bioethik-Debatte bricht die Rivalität zwischen SPD-General Muntefering und Ministerpräsident Clement wieder auf. In: Süddeutsche Zeitung Nr. 139 (20.06.2001), S. 6.
- [SZ 21.6.01a] Börger, Heribert (2001): Auf dem Weg zum Teufel. Leserbrief. In: Süddeutsche Zeitung Nr. 140 (21.06.2001), S. 41.
- [SZ 21.6.01b] Hebel, Rudolf (2001): Leben beginnt mit der Gehirnfunktion. Leserbrief. In: Süddeutsche Zeitung Nr. 140 (21.06.2001), S. 41.

- [SZ 21.6.01c] Heims, Hans-Jörg (2001): CDU und Grüne üben Kritik an Clement. In: Süddeutsche Zeitung Nr. 140 (21.06.2001), S. 5.
- [SZ 21.6.01d] Hoffmann, Andreas (2001): CDU verwirft Verbot von Stammzellenimport. In: Süddeutsche Zeitung Nr. 140 (21.06.2001), S. 2.
- [SZ 21.6.01e] Köhl, Harald (2001): Auf die Enttäuschung hoffen. In: Leserbrief. In: Süddeutsche Zeitung Nr. 140 (21.06.2001), S. 41.
- [SZ 22.6.01] Graupner, Heidrun (2001): Gene – Erfindung oder Entdeckung? Das Biopatent-Gesetz spaltet die Parteien im Bundestag. In: Süddeutsche Zeitung Nr. 141 (22.06.2001), S. 1.
- [SZ 25.6.01] Göttler, Fritz (2001): Macht der Gene. Hubert Markl bringt Biologie und Kulturwissenschaft zusammen. In: Süddeutsche Zeitung Nr. 143 (25.06.2001), S. 13.
- [SZ 26.6.01a] Fellermayr, Josef (2001): Ein subtiler Rächer. Leserbrief. In: Süddeutsche Zeitung Nr. 144 (26.06.2001), S. 11.
- [SZ 26.6.01b] Kühn, Klaus-Dieter (2001): Gentechnikern auf die Pipette sehen. Leserbrief. In: Süddeutsche Zeitung Nr. 144 (26.06.2001), S. 11.
- [SZ 26.6.01c] Süddeutsche Zeitung (ohne Verfasser) (2001): Münzfefering für Nutzung von Embryonalzellen. In: Süddeutsche Zeitung Nr. 138 (19.06.2001), S. 7.
- [SZ 26.6.01d] Süddeutsche Zeitung (ohne Verfasser) (2001): SPD gegen Änderung an Gentechnik-Gesetz. In: Süddeutsche Zeitung Nr. 144 (26.06.2001), S. 5.
- [SZ 29.6.01a] Arndt, Berthold (2001): Horrorszenario verunsichert Bürger. Leserbrief. In: Süddeutsche Zeitung Nr. 147 (29.06.2001), S. 13.
- [SZ 29.6.01b] Berndt, Christina (2001): Jungbrunnen für Stammzellen. Die Ziele des Kieler Forschers. In: Süddeutsche Zeitung Nr. 147 (29.06.2001), S. 2.
- [SZ 29.6.01c] Graupner, Heidrun (2001): Ethiker unter Zeitdruck. Im Wettlauf mit der Wissenschaft kommen die Politiker mit der Definition des moralisch Vertretbaren nicht nach. In: Süddeutsche Zeitung Nr. 147 (29.06.2001), S. 2.
- [SZ 29.6.01d] Heymann, Manfred (2001): Verengte Sichtweise. Leserbrief. In: Süddeutsche Zeitung Nr. 147 (29.06.2001), S. 13.
- [SZ 29.6.01e] Klüver, Reymer (2001): Neuland an der Förde. Ein Kieler Biochemiker will mit embryonalen Stammzellen aus Australien experimentieren. In: Süddeutsche Zeitung Nr. 147 (29.06.2001), S. 2.
- [SZ 29.6.01f] Reuke, Alfons Werner (2001): Mit der Moral sich über andere erheben. Leserbrief. In: Süddeutsche Zeitung Nr. 147 (29.06.2001), S. 13.
- [SZ 29.6.01g] Riegels, Dieter (2001): Latente Verwertbarkeit der Welt. Leserbrief. In: Süddeutsche Zeitung Nr. 147 (29.06.2001), S. 13.
- [SZ 30.6.01a] Berndt, Christina/Wormer, Holger (2001): Streit um Potenzial Von Stammzellen. In: Süddeutsche Zeitung Nr. 148 (30.06.2001), S. 6.
- [SZ 30.6.01b] Kissler, Alexander (2001): Gewachsen oder gemacht. Jürgen Habermas greift erstmals in die Gen-Debatte ein. In: Süddeutsche Zeitung Nr. 148 (30.06.2001), S. 13.
- [SZ 2.7.01a] Wirtz, Christiane (2001): Biotechnologie in Deutschland: Eine Branche wächst. Die riskante Suche nach der Medizin. Trotz Ethik-Debatte und hoher Forschungskosten werden immer mehr Unternehmen gegründet. In: Süddeutsche Zeitung Nr. 149 (02.07.2001), S. 22.

- [SZ 2.7.01b] Wormer, Holger (2001): Einfuhr ist juristisch zulässig. „Deutsche Forscher importieren Stammzellen“. Amerikanisches Institut will bereits seit einem Jahr an Universitäten liefern. DFG bezweifelt Angaben. In: Süddeutsche Zeitung Nr. 149 (02.07.2001), S. 5.
- [SZ 3.7.01a] Süddeutsche Zeitung (ohne Verfasser) (2001): Wissenschaftler bestellen in den USA. Stammzellen nach Deutschland importiert. In: Süddeutsche Zeitung Nr. 150 (03.07.2001), S. 1.
- [SZ 3.7.01b] Urban, Martin (2001): Im Profil. Ernst-Ludwig Winnacker Verfechter der Stammzellenforschung. In: Süddeutsche Zeitung Nr. 150 (03.07.2001), S. 4.
- [SZ 4.7.01a] Berndt, Christina (2001): DFG vertagt Entscheidung. In: Süddeutsche Zeitung Nr. 151 (04.07.2001), S. 6.
- [SZ 4.7.01b] Fried, Nico (2001): Genforschung: Embryonale Stammzellen vorerst auf Eis gelegt. Forscher sollen keine vollendeten Tatsachen schaffen. SPD und Grüne einigen sich auf gemeinsamen Bundestags-Antrag zur Gentechnologie. In: Süddeutsche Zeitung Nr. 151 (04.07.2001), S. 6.
- [SZ 4.7.01c] Süddeutsche Zeitung (ohne Verfasser) (2001): Armutszeugnis für die Fraktionen. In: Süddeutsche Zeitung Nr. 151 (04.07.2001), S. 4.
- [SZ 4.7.01d] Wormer, Holger (2001): Routine-Bestellung. Uni Köln bestätigt Zell-Lieferung aus den USA. DFG sieht sich nicht als Kontrollorgan. In: Süddeutsche Zeitung Nr. 151 (04.07.2001), S. 6.
- [SZ 5.7.01a] Kollek, Regine/Schneider, Ingrid (2001): Verschwiegene Interessen. Die DFG-Position zur Stammzellforschung und der Streit um den Import embryonaler Zellen. In: Süddeutsche Zeitung Nr. 152 (05.07.2001), S. 19.
- [SZ 5.7.01b] Süddeutsche Zeitung (ohne Verfasser) (2001): Rede bei der Deutschen Forschungsgemeinschaft. Schröder will Debatte über Gentechnik vorantreiben. Neues Gesetz zur Embryonenforschung abgelehnt. Mediziner weist auf künftige Therapiemöglichkeiten hin. In: Süddeutsche Zeitung Nr. 152 (05.07.2001), S. 5.
- [SZ 5.7.01c] Süddeutsche Zeitung (ohne Verfasser) (2001): Sinner will Debatte zur Bioethik ohne Zeitdruck. In: Süddeutsche Zeitung Nr. 152 (05.07.2001), S. 49.
- [SZ 5.7.01d] Wormer, Holger (2001): Wie deutsche Pharma- und Biotechnologieverbände die Forschung mit Stammzellen bewerten. Firmen haben offiziell noch keine embryonalen Zellen importiert. Kein akutes Interesse an der Einfuhr. In: Süddeutsche Zeitung Nr. 152 (05.07.2001), S. 23.
- [SZ 6.7.01a] Berndt, Christina (2001): Geduldssprobe für Wissenschaftler. Deutsche Forscher erhoffen eine schnelle gesellschaftliche Entscheidung zur Forschung mit Embryonen. In: Süddeutsche Zeitung Nr. 153 (06.07.2001), S. 2.
- [SZ 6.7.01b] Hujer, Marc (2001): Debatte um die Stammzellforschung. Zwischen Kirche und Kommerz. US-Präsident George W. Bush ist im Streit um die Gentechnik zwischen Industrie und religiöser Wählerschaft hin- und hergerissen. In: Süddeutsche Zeitung Nr. 153 (06.07.2001), S. 11.
- [SZ 6.7.01c] Süddeutsche Zeitung (ohne Verfasser) (2001): „Von der Therapie noch meilenweit entfernt“. Der Münchner Klon-Experte Eckhard Wolf sieht bei der Herstellung von Stammzellen noch erheblichen Forschungsbedarf. In: Süddeutsche Zeitung Nr. 153 (06.07.2001), S. 2.
- [SZ 6.7.01d] Süddeutsche Zeitung (ohne Verfasser) (2001): Brief an die Bundesregierung. DFG fordert eigene Behörde für Stammzellen-Forschung. Bis zur Entscheidung des Bundestages werden Forschungsanträge zurückgestellt. Parlament lehnt Importverbot ab. In: Süddeutsche Zeitung Nr. 153 (06.07.2001), S. 6.
- [SZ 6.7.01e] Süddeutsche Zeitung (ohne Verfasser): Unnötige Schärfe. In: Süddeutsche Zeitung Nr. 153 (06.07.2001), S. 4.

- [SZ 7.7.01] Süddeutsche Zeitung (ohne Verfasser) (2001): „Gentechnik-Debatte ist absurd“. In: Süddeutsche Zeitung Nr. 154 (07.07.2001), S. 6.
- [SZ 9.7.01a] Berndt, Christina (2001): Vorsprung: Israel und Großbritannien. Die Thora und der Wunsch zu heilen. In Israel ist das Klima für die Biotech-Branche gut – religiöse Lehren und staatliche Förderung begünstigen das Wachstum. In: Süddeutsche Zeitung Nr. 155 (09.07.2001), S. 23.
- [SZ 9.7.01b] Henkel, Imke (2001): Dolly war kein Zufall. Liberale Gesetze schaffen Freiraum für die Genforschung in Großbritannien. Mehr Mut zum finanziellen Risiko als in Deutschland. In: Süddeutsche Zeitung Nr. 155 (09.07.2001), S. 23.
- [SZ 10.7.01a] Spahn, Susanne (2001): Ethikrat beschränkt sich auf Stellungnahme. In: Süddeutsche Zeitung Nr. 156 (10.07.2001), S. 10.
- [SZ 10.7.01b] Süddeutsche Zeitung (Ohne Verfasser) (2001): Klon nicht gleich Klon. Stammzellen laufen leicht in die Irre. In: Süddeutsche Zeitung Nr. 156 (10.07.2001), S. V2/9.
- [SZ 10.7.01c] Wormer, Holger (2001): Kommentar: Wenn niemand danach fragt. In: Süddeutsche Zeitung Nr. 156 (10.07.2001); S. V2/10.
- [SZ 13.7.01] Wormer, Holger (2001): „Abstürze auf einer glitschigen Piste“. Empörung über die Herstellung von Embryonen für die Forschung. US-Firma bestätigt auch Klon-Versuche. DFG-Präsident Winnacker sieht rein kommerzielle Interessen. In: Süddeutsche Zeitung Nr. 159 (13.07.2001), S. 6.
- [SZ 20.7.01] Finetti, Marco (2001): Die Göttinger Universität möchte Oliver Brüstle aus Bonn abwerben. Wettlauf um den Wissenschaftler. In: Süddeutsche Zeitung Nr. 165 (20.07.2001), S.8.
- [SZ 26.7.01] Schmidt, Tilman (2001): Fantasien der Machbarkeit. Leserbrief. In: Süddeutsche Zeitung Nr. 170 (26.07.2001), S. 11.
- [SZ 27.7.01] Finetti, Marco (2001): Frühwald rügt Debatte über Stammzellforschung. In: Süddeutsche Zeitung Nr. 171 (27.07.2001), S. 6.
- [SZ 30.7.01] Graff, Friedrich Wilhelm (2001): Der große Zwist. Frühwald gegen Markl und Winnacker. In: Süddeutsche Zeitung Nr. 173 (30.07.2001), S. 13.
- [SZ 2.8.01a] Dittmar, Ingo (2001): Täglicher Massenmord an Kindern. Leserbrief. In: Süddeutsche Zeitung Nr. 176 (02.08.2001), S. 38.
- [SZ 2.8.01b] Frühwald, Wolfgang (2001): Billige Konfessionspolemik. Kritik an der Genforschungsdebatte. In: Süddeutsche Zeitung Nr. 176 (02.08.2001), S. 13.
- [SZ 2.8.01c] Krolla, Nadine (2001): Es ist zum Heulen. Leserbrief. In: Süddeutsche Zeitung Nr. 176 (02.08.2001), S. 38.
- [SZ 2.8.01d] Mataré, Herbert F. (2001): Den Verstand anwenden. Leserbrief. In: Süddeutsche Zeitung Nr. 176 (02.08.2001), S. 38.
- [SZ 2.8.01e] Sadegh-Zadeh, Kazem (2001): Die Verfassung ändern. Leserbrief. In: Süddeutsche Zeitung Nr. 176 (02.08.2001), S. 38.
- [SZ 2.8.01f] Schukraft, Corina (2001): Egozentrische Gesellschaft. Leserbrief. In: Süddeutsche Zeitung Nr. 176 (02.08.2001), S. 38.
- [SZ 2.8.01g] Süddeutsche Zeitung (ohne Verfasser) (2001): Klar gegen Klonen. In: Süddeutsche Zeitung Nr. 176 (02.08.2001), S. 4.
- [SZ 8.8.01] Raulff, Ulrich (2001): Das Leben, ein Diskurs. Bioethik: Zum jüngsten Humanstreit in Deutschland. In: Süddeutsche Zeitung Nr. 181 (08.08.2001), S. 13.

- [SZ 11.8.01] Süddeutsche Zeitung (ohne Verfasser) (2001): Ethische Minenfelder. Forscher und Ärzte zeigen sich zufrieden, Kirchen sind entrüstet. In: Süddeutsche Zeitung Nr. 184 (11.08.2001), S. 21.
- [SZ 14.8.01a] Busch, George W. (2001): Stammzellenforschung und Erhalt des Lebens. In: Süddeutsche Zeitung Nr. 186 (14.08.2001), S. 13.
- [SZ 14.8.01b] Süddeutsche Zeitung (ohne Verfasser) (2001): Haut als effektive Quelle für Stammzellen. In: Süddeutsche Zeitung Nr. 186 (14.08.2001), S. V2/7.
- [SZ 22.8.01] Illinger, Patrick (2001): Gen oder nicht geh'n. Von den Schranken des Determinismus in der Biotechnik. In: Süddeutsche Zeitung Nr. 192 (22.08.2001), S. 13.
- [SZ 23.8.01] Hoffmann, Thomas Sören (2001): Wer will unter die Piraten? Menschenwürde nach Hubert Markl: Freiheit an der Grenze zur Freibeuterei. In: Frankfurter Allgemeine Zeitung Nr. 195 (23.08.2001), S. 42.
- [SZ 4.9.01a] Karow, Julia (2001): allein Schweden hat 24 Stammzelllinien. In: Süddeutsche Zeitung Nr. 203 (04.09.2001), S. V2/9.
- [SZ 4.9.01b] Koch, Klaus (2001): Wer heilt, hat Recht – oder auch nicht. Der Düsseldorfer Stammzellfall zeigt einmal mehr: Viele Ärzte neigen zu voreiligen Sensationsmeldungen. In: Süddeutsche Zeitung Nr. 203 (04.09.2001), S. V2/7.
- [SZ 11.9.01] Rentsch, Anne (2001): „Christentum spielt kaum noch eine Rolle“. Schweden setzt auf Stammzellen. Parteien hoffen auf Wirtschaftsimpulse durch Forschung. In: Süddeutsche Zeitung Nr. 209 (11.09.2001), S.6.
- [SZ 15.9.01] Habermas, Jürgen (2001): Die Selbstinstrumentalisierung des Menschen und ihrer Schrittmacher. Auch in der Diskussion über die Gentechnik führen Pluralismus und Toleranz nicht notwendig in den Relativismus. In: Süddeutsche Zeitung Nr. 213 (15.09.2001), S. 15.
- [SZ 25.9.01a] Drobinski, Matthias (2001): Appell an die Wissenschaft. Lehmann: Menschenwürde des Embryos achten. Vorsitzender der Deutschen Bischofskonferenz ist entsetzt über die Worte wie „Zellhaufen“ oder „Rohstoff“. In: Süddeutsche Zeitung Nr. 221 (25.09.2001), S. 11.
- [SZ 25.9.01b] Wormer, Holger (2001): Der Streit um die Macht der Zellen. Stammzellen aus Embryonen sind ein begehrtes Forschungsobjekt, aber haben sie vielleicht doch noch das Zeug zu einem ganzen Menschen? In: Süddeutsche Zeitung Nr. 221 (25.09.2001), S. V2/14.
- [SZ 16.10.01] Koch, Klaus (2001): Stell dir vor, man darf klonen – und keiner fängt an. Neun Monate nach der Lockerung der Gesetze gibt es in London keine Anträge, menschliche Embryonen nach der Dolly-Methode zu schaffen. In: Süddeutsche Zeitung Nr. 238 (16.10.2001), S. V2/9.
- [SZ 20.10.01] Arndt, Berthold (2001): Fernab vom gesunden Menschenverstand. Leserbrief. In: Süddeutsche Zeitung Nr. 242 (20.10.2001), S. 44.
- [SZ 26.10.01] Berndt, Christina (2001): Ethikrat fühlt Druck bei der Stammzellentscheidung. In: Süddeutsche Zeitung Nr. 247 (26.10.2001), S. 8.
- [SZ 29.10.01] Graupner, Heidrun (2001): Ethikrat in Abwehrstellung. Das Gremium des Bundeskanzlers verbittet sich bei der Entscheidung über einen Stammzellen-Import auch Druck von innen. In: Süddeutsche Zeitung Nr. 249 (29.10.2001), S. 7.
- [SZ 31.10.01a] Graupner, Heidrun (2001): Ethikrat ist noch „in Delphi beim Orakel“. In: Süddeutsche Zeitung Nr. 251 (31.10.2001), S. 6.
- [SZ 31.10.01b] Markl, Hubert (2001): Der Mensch ist moralisch großzügig geschneidert und leidet an den Folgen seiner Doppelnatur: Der Irrweg von der Evolutionsbiologie und Genetik zu Rassismus und Mord. Eine Rede von Hubert Markl über die entgrenzte Wissenschaft. In: Süddeutsche Zeitung Nr. 251 (31.10.2001), S. 19.

- [SZ 31.10.01c] Süddeutsche Zeitung (ohne Verfasser) (2001): Diskurs- und Lebenslinien. Hubert Markl spricht – und unterwandert Jürgen Habermas. In: Süddeutsche Zeitung Nr. 251 (31.10.2001), S. 19.
- [SZ 2.11.01] Drobinski, Matthias (2001): Gebhard der Fürst: „Bin ich jetzt Teil des schwarzen Blocks?“ Der Herr der kleinen Dinge. Wie der Bischof von Rottenburg-Stuttgart versucht, in Kirche und Politik Akzente zu setzen. In: Süddeutsche Zeitung Nr. 252 (02.11.2001), S. 12.
- [SZ 7.11.01a] Burtscheidt, Christine (2001): Bewegung im ethischen Minenfeld. Die CSU denkt daran, den Import embryonaler Stammzellen unter strengen Auflagen im Einzelfall zuzulassen. In: Süddeutsche Zeitung Nr. 256 (07.11.2001), S. 57.
- [SZ 7.11.01b] Rolff, Marten (2001): Vor dem Bericht der Enquete-Kommission des Bundestages. Bayerns Forscher debattieren über Stammzellen. Viele Wissenschaftler hoffen auf eine Liberalisierung des Embryonenschutzes in Deutschland. In: Süddeutsche Zeitung Nr. 256 (07.11.2001), S. 57.
- [SZ 9.11.01] Graupner, Heidrun (2001): Am Montag legt die Enquetekommission des Bundestages ihren Bericht vor. „Unsere Entscheidung wird niemanden zum Auswandern zwingen“. Es zeichnet sich ab, dass das Gremium ein Verbot der Forschung an Embryonen in Deutschland empfehlen wird. In: Süddeutsche Zeitung Nr. 258 (09.11.2001), S. 12.
- [SZ 13.11.01a] Kreschner, Helmut (2001): Gentechnik-Symposium in Triberg. Von Mäusen und Menschen. Die Nobelpreisträgerin Christiane Nüsslein-Volhard warnt vor Isolation der deutschen Forschung. In: Süddeutsche Zeitung Nr. 261 (13.11.2001), S. 11.
- [SZ 13.11.01b] Wirtz, Christiane (2001). Empfehlung der Bundestags-Enquetekommission. Abgeordnete sollen ohne Zwang über Stammzellen entscheiden. Vorsitzende Margot von Renesse: Jeder muss seinem Gewissen folgen. Antrag für SPD-Parteitag lässt Import offen. In: Süddeutsche Zeitung Nr. 261 (13.11.2001), S. 6.
- [SZ 14.11.01] Graupner, Heidrun (2001): Votum für Embryo. Enquetekommission lehnt Stammzellenimport aus ethischen Gründen ab. In: Süddeutsche Zeitung Nr. 262 (14.11.2001), S. 1.
- [SZ 17.11.01] Kirschfeld, Kuno (2001): Wann beginnt der Mensch, ein Mensch zu sein? Beim Embryonenschutzgesetz kann sich das Parlament nicht auf gesicherte wissenschaftliche Erkenntnisse berufen. In: Süddeutsche Zeitung Nr. 265 (17.11.2001), S. ROM 2.
- [SZ 19.11.01] Lehmann, Volker (2001): Klon und Lohn. Rationalität und Religion streiten in der amerikanischen Bioethik. In: Süddeutsche Zeitung Nr. 266 (19.11.2001), S. 15.
- [SZ 22.11.01] Wormer, Holger (2001): Kontroverse um Forschungsantrag aus Bonn. Stammzellvotum soll vertagt werden. Winnacker bittet DFG-Gremium um Aufschub bis Ende Januar. In: Süddeutsche Zeitung Nr. 269 (22.11.2001), S. 6.
- [SZ 23.11.01a] David, Robert (2001): Herausforderung annehmen. Leserbrief. In: Süddeutsche Zeitung Nr. 270 (23.11.2001), S. 38.
- [SZ 23.11.01b] Finetti, Marco (2001): Im Profil: Peter Gruss künftiger Präsident der Max-Planck-Gesellschaft. In: Süddeutsche Zeitung Nr. 270 (23.11.2001), S. 4.
- [SZ 23.11.01c] Jänner, Nathalie (2001): Glaubensfreiheit bietet keinen Lebensschutz. Leserbrief. In: Süddeutsche Zeitung Nr. 270 (23.11.2001), S. 38.
- [SZ 23.11.01d] Winnacker, Ernst-Ludwig (2001): Die Zeit ist reif. In der Frage der Stammzellenforschung müssen die politischen Instanzen Farbe bekennen – die Deutsche Forschungsgemeinschaft dringt auf Entscheidung in diesem Winter. In: Süddeutsche Zeitung Nr. 270 (23.11.2001), S. 17.
- [SZ 23.11.01e] Wisser, Josef (2001): Verdrängung biologischer Fakten. Leserbrief. In: Süddeutsche Zeitung Nr. 270 (23.11.2001), S. 38.

- [SZ 24.11.01] Süddeutsche Zeitung (ohne Verfasser) (2001): Katholiken gegen Import von Stammzellen. In: Süddeutsche Zeitung Nr. 271 (24.11.2001), S. 5.
- [SZ 27.11.01a] Burtscheidt, Christine (2001): Klon-Experiment empört die CSU. Fraktionschef Glück fordert ein weltweites Verbot. In: Süddeutsche Zeitung Nr. 273 (27.11.2001), S. 51.
- [SZ 27.11.01b] Finetti, Marco (2001): Stammzellforschung ja – aber nicht mit der Brechstange. Interview mit Peter Gruss, dem neu gewählten Präsidenten der Max-Planck-Gesellschaft. In: Süddeutsche Zeitung Nr. 273 (27.11.2001), S. V2/12.
- [SZ 27.11.01c] Graff, Bernd (2001): Hello Dolly. Rubikon auf amerikanisch: Die Embryonenzucht aus Zellmaterial. In: Süddeutsche Zeitung Nr. 273 (27.11.2001), S. 15.
- [SZ 27.11.01d] Wormer, Holger (2001): Vorhang auf im Klontheater. Seit Dolly hat die Politik zu lange debattiert und zu wenig reagiert – in Deutschland wie im Ausland. In: Süddeutsche Zeitung Nr. 273 (7.11.2001), S. 4.
- [SZ 28.11.01a] Orzessek, Arno (2001): Perfektion ist ein Verbrechen. Erste deutsche Bürgerkonferenz zur Gen-Diagnostik in Dresden. In: Süddeutsche Zeitung Nr. 274 (28.11.2001), S. 16.
- [SZ 28.11.01b] Süddeutsche Zeitung (ohne Verfasser) (2001): Experimente an menschlichen Embryonen. Wissenschaftler fordern Klon-Verbot. Rasche Entscheidung des Bundestages verlangt. In: Süddeutsche Zeitung Nr. 274 (28.11.2001), S. 6.
- [SZ 29.11.01a] Graupner, Heidrun (2001): Spiros Simitis über das therapeutische Klonen. „Hoffnungen haben keinen Bestand“. Der Vorsitzende des Nationalen Ethikrates fordert, der Gesetzgeber müsse bald Klarheit schaffen. In: Süddeutsche Zeitung Nr. 275 (29.11.2001), S. 8.
- [SZ 29.11.01b] Graupner, Heidrun (2001): Vor der Entscheidung. Heute legt der Nationale Ethikrat seine Empfehlung zum Stammzellen-Import vor. In: Süddeutsche Zeitung Nr. 275 (29.11.2001), S. 8.
- [SZ 29.11.01c] Markel, Hubert (2001): Maßlos. Der Wirbel um das Klonen. In: Süddeutsche Zeitung Nr. 275 (29.11.2001), S. 15.
- [SZ 29.11.01d] Süddeutsche Zeitung (ohne Verfasser) (2001): Rau fordert Grenzen bei Stammzellenerforschung. In: Süddeutsche Zeitung Nr. 275 (29.11.2001), S. 2.
- [SZ 29.11.01e] Graupner, Heidrun (2001): Das falsche Zauberwort. In: Süddeutsche Zeitung Nr. 275 (29.11.2001), S. 4.
- [SZ 30.11.01a] Graupner, Heidrun (2001): Das falsche Zahlwort. In: Süddeutsche Zeitung Nr. 275 (29.11.2001), S. 4.
- [SZ 30.11.01b] Graupner, Heidrun (2001): Mit 14 gegen acht Stimmen. Mehrheit im Ethikrat für Import von Stammzellen. Beratungsgremium der Bundesregierung macht zeitliche Begrenzung und strenge Auflagen zur Bedingung. In: Süddeutsche Zeitung Nr. 276 (30.11.2001), S. 1.
- [SZ 30.11.01c] Süddeutsche Zeitung (ohne Verfasser) (2001): Die Grenzen der Gentechnik. In: Süddeutsche Zeitung Nr. 276 (30.11.2001), S. 4.
- [SZ 1.12.01a] Graupner, Heidrun (2001): Geteilte Reaktionen auf Empfehlung des Nationalen Ethikrats. Kirche: Stammzellenimport verstößt gegen Würde. Ministerin Bulmahn sieht dagegen notwendige Freiheit der Forschung gewährleistet. In: Süddeutsche Zeitung Nr. 277 (01.12.2001), S. 6.
- [SZ 1.12.01b] Nüsslein-Volhard, Christiane (2001): Der Mensch nach Maß – unmöglich. Von den Genen und Embryonen – und warum die Schöpfung aus der Petrischale eine reine Illusion ist. In: Süddeutsche Zeitung Nr. 277 (01.12.2001) SZ am Wochenende, S. ROM 1.
- [SZ 3.12.01a] Horn, Martin (2001): Am Anfang war das Licht. Leserbrief. In: Süddeutsche Zeitung Nr. 278 (03.12.2001), S. 20.

- [SZ 3.12.01b] Kitzmantel, Peter (2001): Ethik - ein schwammiger Begriff. Leserbrief. In: Süddeutsche Zeitung Nr. 278 (03.12.2001), S. 20.
- [SZ 7.12.01] Wormer, Holger (2001): Verdammt, vertagt und doch nicht verboten. Der DFG muss beim umstrittensten deutschen Forschungsantrag weiter auf die Politik warten. In: Süddeutsche Zeitung Nr. 282 (07.12.2001), S. 4.
- [SZ 8.12.01] Finetti, Marco (2001): Forschungsorganisation folgt der Bitte des Bundestags. DFG verschiebt Stammzellen-Entscheidung zum dritten Mal. Struck und Glück wollen bei Parlamentsdebatte über die umstrittenen Forschungen den Fraktionszwang aufheben. In: Süddeutsche Zeitung Nr. 283 (08.12.2001), S. 6.
- [SZ 10.12.01] Graupner, Heidrun (2001): Mehrheit des Vorstandes billigt Positionspapier. CSU für Import von Stammzellen in engen Grenzen. In: Süddeutsche Zeitung Nr. 284 (10.12.2001), S. 6.
- [SZ 17.12.01] Süddeutsche Zeitung (ohne Verfasser) (2001): Limbach nicht gegen therapeutisches Klonen. In: Süddeutsche Zeitung Nr. 290 (17.12.2001), S. 6.
- [SZ 20.12.01] Bolesch, Cornelia (2001): Ethik ohne Grenzen. EU-Kommissar Busquin verteidigt die geplante Embryonenerforschung durch die Europäische Union. In: Süddeutsche Zeitung Nr. 293 (20.12.2001), S. 10.
- [SZ 24.12.01] Graupner, Heidrun (2001): In die Debatte um den Stammzell-Import kommt Bewegung. von Räten und Ratschlägen. Nach dem Votum des Kanzler-Gremiums arbeiten Befürworter und Gegner der umstrittenen Zell-Einfuhr an Gesetzesentwürfen. In: Süddeutsche Zeitung Nr. 296 (24.12.2001), S. 9.
- [SZ 27.12.01] Süddeutsche Zeitung (ohne Verfasser) (2001): Wetter warnt vor Gentechnik. Kardinal mahnt Achtung der Menschenwürde an. In: Süddeutsche Zeitung Nr. 297 (27.12.2001), S. 39.
- [SZ 31.12.01] Wormer, Holger (2001): Objekt der Begierde: Ein menschlicher Embryo auf der Spitze einer Nadel etwa 350-fach vergrößert. In eine Gebärmutter eingepflanzt, kann sich aus den zehn Zellen ein ganzer Mensch entwickeln. Das Abc des Lebenswissens. In: Süddeutsche Zeitung Nr. 300 (31.12.2001), S. V3/18.
- [SZ 02.1.02a] Süddeutsche Zeitung (2002) (ohne Verfasser): Bulmahn erwartet Ja zum Stammzellen-Import. In: Süddeutsche Zeitung Nr. 1 (02.01.2002), S. 6.
- [SZ 2.1.02b] Süddeutsche Zeitung (2002) (ohne Verfasser): Predigten zum Jahreswechsel. Kirchen rufen zu Kampf gegen Hunger und Elend auf. In: Süddeutsche Zeitung Nr. 1 (02.01.2002), S. 5.
- [SZ 3.1.02] Rubner, Jeanne (2000): Grenzbereiche jenseits der Parteigrenzen. Die ethischen Folgen des medizinischen Fortschritts stellen herkömmliche Politikmuster in Frage. In: Süddeutsche Zeitung Nr. 300 (30.12.2000), S. 4.
- [SZ 8.1.02] Mankau, Raphael (2002): Finger und Herz verbrennen. Leserbrief. In: Süddeutsche Zeitung Nr. 6 (08.01.2002), S. 18.
- [SZ 10.1.02] Süddeutsche Zeitung (2002) (ohne Verfasser): Stammzellen-Import mit Einschränkungen. In: Süddeutsche Zeitung Nr. 8 (10.01.2002), S. 46.
- [SZ 12.1.02a] Finetti, Marco (2002): Stammzellforscher Brüstle bleibt in Bonn. In: Süddeutsche Zeitung Nr. 10 (12.01.2002), S. 5.
- [SZ 12.1.02b] Süddeutsche Zeitung (2002) (ohne Verfasser): CSU hält an Zell-Import fest. Partei lässt sich von Einwänden der Kirchen nicht beirren. In: Süddeutsche Zeitung Nr. 10 (12.01.2002), S. 54.
- [SZ 14.1.02] Süddeutsche Zeitung (2002) (ohne Verfasser): CDU uneins über Stammzellen-Import. In: Süddeutsche Zeitung Nr. 11 (14.01.2002), S. 7.

- [SZ 15.1.02] Graupner, Heidrun (2002): Die Debatte über die Zulässigkeit der Forschung an Embryonen. Ein zelluläres Gebilde wie du und ich. In: Süddeutsche Zeitung Nr. 12 (15.01.2002), S. 10.
- [SZ 18.1.02] Süddeutsche Zeitung (2002) (ohne Verfasser): Bischöfe schreiben an Abgeordnete. In: Süddeutsche Zeitung Nr. 15 (18.01.2002), S. 7.
- [SZ 19.1.02] Maier-Albang, Monika (2002): „Dann können wir nur noch beten“. Der Konflikt zwischen CSU und Kirche in der Frage des Stammzellen-Imports spitzt sich zu. In: Süddeutsche Zeitung Nr. 16 (19.01.2002), S. 58.
- [SZ 22.1.02a] Hoffmann, Andreas (2002): Debatte über Embryonen-Forschung. Koalition und Union streben Gesetz bis Juli an. In: Süddeutsche Zeitung Nr. 18 (22.01.2002), S. 6.
- [SZ 22.1.02b] Süddeutsche Zeitung (2002) (ohne Verfasser): Vergebliche Mühe. MS-Kranken nützen Stammzellen nichts. In: Süddeutsche Zeitung Nr. 18 (22.01.2002), S. V2/7.
- [SZ 22.1.02c] Süddeutsche Zeitung (2002) (ohne Verfasser): Vor der Entscheidung im Bundestag. Differenzen über den Import von Stammzellen im Kabinett. In: Süddeutsche Zeitung Nr. 17 (21.01.2002), S. 6.
- [SZ 23.1.02a] Maier-Albang, Monika (2002): „Auch wenn es andere machen, ist es nicht richtig“. Interview mit Johannes Friedrich. In: Süddeutsche Zeitung Nr. 19 (23.01.2002), S. 55.
- [SZ 23.1.02b] Thureau, Martin (2002): „Das ist eine hoffnungsvolle Quelle“. Warum Herzspezialist Wolfgang-Michael Franz mit embryonalen Stammzellen experimentieren möchte. Interview. In: Süddeutsche Zeitung Nr. 19 (23.01.2002), S. 49.
- [SZ 24.1.02] Süddeutsche Zeitung (2002) (ohne Verfasser): DFG-Präsident: Forscher müssen Tabus brechen. In: Süddeutsche Zeitung Nr. 20 (24.01.2002), S. 8.
- [SZ 25.1.02] Wormer, Holger (u.a.) (2002): Embryonen-Opfer womöglich überflüssig. Potente Zellen aus Knochenmark. In: Süddeutsche Zeitung Nr. 21 (25.01.2002), S. 6.
- [SZ 26.1.02a] Graupner, Heidrun (u.a.) (2002): Gesellschaft im Wissenskonflikt. Ethische Fragen zum Import embryonaler Stammzellen spalten Parteien, Kirchen und Ärzte. In: Süddeutsche Zeitung Nr. 22 (26.01.2002), S. 2.
- [SZ 26.1.02b] Koch, Klaus (2002): Gute Zellen, Schlechte Zellen. Die Qualität der Importware ist umstritten - für Therapien am Menschen taugt sie nicht. In: Süddeutsche Zeitung Nr. 22 (26.01.2002), S. 2.
- [SZ 26.1.02c] Süddeutsche Zeitung (2002) (ohne Verfasser): Aktuelles Lexikon. Stammzellen. In: Süddeutsche Zeitung Nr. 22 (26.01.2002), S. 2.
- [SZ 26.1.02d] Wormer, Holger (2002): Die Wunschliste der Forscher. Heilung durch Zellen ist ungewiss. In: Süddeutsche Zeitung Nr. 22 (26.01.2002), S. 2.
- [SZ 28.1.02a] Böckenförde, Ernst-Wolfgang (2002): Stammzellenimport: Wie weit reicht die Achtung vor der Würde des Menschen? „Die Frucht einer verbotenen Tat“. In: Süddeutsche Zeitung Nr. 23 (28.01.2002), S. 9.
- [SZ 28.1.02b] Graff, Bernd (2002): Wir wissen nichts. Warum der Import von Stammzellen ein ethisches Einfallstor schafft. In: Süddeutsche Zeitung Nr. 23 (28.01.2002), S. 13.
- [SZ 28.1.02c] Graupner, Heidrun (2002): Ethik ohne Rat. Das Patt von Ethikrat und Enquetekommission spiegelt den Konflikt. In: Süddeutsche Zeitung Nr. 23 (28.01.2002), S. 13.
- [SZ 28.1.02d] Hilpert, Konrad (2002): Differenz nicht so groß. Leserbrief. In: Süddeutsche Zeitung Nr. 23 (28.01.2002), S. 52.

- [SZ 28.1.02e] Schwennicke, Christoph (2002): Bundestag entscheidet über Stammzellenimport. Saarlands SPD-Chef spricht von „Doppelmoral“. In: Süddeutsche Zeitung Nr. 23 (28.01.2002), S. 1.
- [SZ 28.1.02f] Süddeutsche Zeitung (2002) (ohne Verfasser): Clement fordert Stammzell-Import. In: Süddeutsche Zeitung Nr. 23 (28.01.2002), S. 41.
- [SZ 29.1.02a] Balsler, Markus (2002): Ein Rohstoff wie du und ich. In: Süddeutsche Zeitung Nr. 24 (29.01.2002), S. 20.
- [SZ 29.1.02b] Graupner, Heidrun (2002): Stammzell-Import: Wann beginnt das Leben? Der Deutsche Bundestag vor einer schwierigen Entscheidung. In: Süddeutsche Zeitung Nr. 24 (29.01.2002), S. 10.
- [SZ 29.1.02c] Koch, Klaus (2002): Infizierte Stammzellen? Prof. Dr. Klaus Cichutek, Paul-Ehrlich-Institut Langen, über gefährliche Viren in importierten Embryozellen. Interview. In: Süddeutsche Zeitung Nr. 24 (29.01.2002), S. V2/12.
- [SZ 29.1.02d] Balsler, Markus (2002): „Ethisch nicht vertretbar“. Hubert Hüppe gibt dem Embryonenschutz Vorrang. Interview. In: Süddeutsche Zeitung Nr. 24 (29.01.2002), S. 20.
- [SZ 29.1.02e] Rüttgers, Jürgen (2002): Wie bei der Organspende. Warum nur an bereits vorhandenen Stammzell-Linien geforscht werden sollte. In: Süddeutsche Zeitung Nr. 24 (29.01.2002), S. 10.
- [SZ 29.1.02f] Süddeutsche Zeitung (2002) (ohne Verfasser): Grüne mehrheitlich gegen Stammzellen-Import. In: Süddeutsche Zeitung Nr. 24 (29.01.2002), S. 2.
- [SZ 29.1.02g] Süddeutsche Zeitung (2002) (ohne Verfasser): Streit über Import embryonaler Stammzellen. Experte will notfalls in Israel forschen. In: Süddeutsche Zeitung Nr. 24 (29.01.2002), S. 6.
- [SZ 29.1.02h] Süddeutsche Zeitung (2002) (ohne Verfasser): Tausendsassas. Ein Glossar. In: Süddeutsche Zeitung Nr. 24 (29.01.2002), S. 10.
- [SZ 29.1.02i] Vogel, Hans-Jochen (2002): Das mitmenschliche Nein. Auch ein bedingtes Ja zum Stammzellen-Import führt auf die abschüssige Bahn. In: Süddeutsche Zeitung Nr. 24 (29.01.2002), S. 10.
- [SZ 29.1.02j] Süddeutsche Zeitung (2002) (ohne Verfasser): „Wir haben keine Zeit zu verlieren“. Günter Stock sorgt sich um den Forschungs-Standort. Interview. In: Süddeutsche Zeitung Nr. 24 (29.01.2002), S. 20.
- [SZ 30.1.02a] Graupner, Heidrun (2002): Der Mensch als Ware. In: Süddeutsche Zeitung Nr. 25 (30.01.2002), S. 4.
- [SZ 30.1.02b] Süddeutsche Zeitung (2002) (ohne Verfasser): Vor der Entscheidung über den Import von embryonalen Stammzellen. Befürworter schließen sich zusammen. In: Süddeutsche Zeitung Nr. 25 (30.01.2002), S. 6.
- [SZ 31.1.02a] Süddeutsche Zeitung (2002) (ohne Verfasser): Ausweg für die Stammzellen-Forschung. In: Süddeutsche Zeitung Nr. 26 (31.01.2002), S. 4.
- [SZ 31.1.02b] Wormer, Holger (2002): Das kleine Embryonen-Opfer. In: Süddeutsche Zeitung Nr. 26 (31.01.2002), S. 4.
- [SZ 31.1.02c] Hoffmann, Andreas (2002): Debatte um Stammzellen. In: Süddeutsche Zeitung Nr. 26 (31.01.2002), S. 3.
- [SZ 31.1.02d] Süddeutsche Zeitung (2002) (ohne Verfasser): Für und wider den Import embryonaler Stammzellen. Die drei Gruppenanträge, über die der Bundestag zu entscheiden hatte. In: Süddeutsche Zeitung Nr. 26 (31.01.2002), S. 6.

## Mediendokumente der Wochenzeitung Die Zeit

### a) analysierte Dokumente nach Datum der Ausgabe

- [Zeit 19.11.98] Willmann, Urs (1998): Hände weg vom Embryo? Wird es spannend, müssen deutsche Forscher passen. In: Die Zeit vom 19.11.1998.
- [Zeit 24.8.00] Sentker, Andreas (2000): Die Verheißung. In: ZEITdokument 1/2002. Stammzellen. Embryonen als Ersatzteillager?, S. 44-45.
- [Zeit 24.8.00] Bartens, Werner (2000): Revolutionäre Zellen. In: ZEITdokument 1/2002. Stammzellen. Embryonen als Ersatzteillager?, S. 9-13.
- [Zeit 24.8.00] Roß, Jan (2000): Das Monströse. In: ZEITdokument 1/2002. Stammzellen. Embryonen als Ersatzteillager?, S. 46-47.
- [Zeit 19.10.00] Keller, Martina (2000): Rohstoff Mensch. Ein Gespräch mit John D. Gearhart. Interview. In: ZEITdokument 1/2002. Stammzellen. Embryonen als Ersatzteillager?, S. 14-16.
- [Zeit 28.12.00] von Randow, Gero (2000): Das Jahr der Biopolitik. In: ZEITdokument 1/2002. Stammzellen. Embryonen als Ersatzteillager?, S. 66-68.
- [Zeit 18.1.01] Spaemann, Robert (2001): Gezeugt, nicht gemacht. In: ZEITdokument 1/2002. Stammzellen. Embryonen als Ersatzteillager?, S. 71-74.
- [Zeit 25.1.01] Merkel, Reinhard (2001): Rechte für Embryonen? In: ZEITdokument 1/2002. Stammzellen. Embryonen als Ersatzteillager?, S. 75-79.
- [Zeit 1.2.01] Höffe, Otfried (2001): Wessen Menschenwürde? In: ZEITdokument 1/2002. Stammzellen. Embryonen als Ersatzteillager?, S. 80-82.
- [Zeit 15.2.01] Joas, Hans (2001): Grenzen der Verfügbarkeit. In: ZEITdokument 1/2002. Stammzellen. Embryonen als Ersatzteillager?, S. 86-88.
- [Zeit 22.2.01] Schöne-Seifert, Bettina (2001): Von Anfang an? In: ZEITdokument 1/2002. Stammzellen. Embryonen als Ersatzteillager?, S. 89-91.
- [Zeit 1.3.01] Höhle, Vittorio (2001): Heilung um jeden Preis? In: ZEITdokument 1/2002. Stammzellen. Embryonen als Ersatzteillager?, S. 92-95.
- [Zeit 8.3.01] Assheuer, Thomas (2001): Embryonen bleiben tabu. In: ZEITdokument 1/2002. Stammzellen. Embryonen als Ersatzteillager?, S. 96-98.
- [Zeit 8.3.01] Bahnsen, Ulrich (2001): Das ist ein Traum, ein Albtraum. Ein Gespräch mit Ian Wilmut. Interview. In: ZEITdokument 1/2002. Stammzellen. Embryonen als Ersatzteillager?, S. 20-23.
- [Zeit 3.5.01] van den Daele, Wolfgang (2001): Zweierlei Moral. In: ZEITdokument 1/2002. Stammzellen. Embryonen als Ersatzteillager?, S. 51-53.
- [Zeit 18.5.01] Rau, Johannes (2001): Fortschritt nach menschlichem Maß. In: ZEITdokument 1/2002. Stammzellen. Embryonen als Ersatzteillager?, S. 32-37.
- [Zeit 23.5.01] Hofmann, Gunter (2001): Die Schlacht am Rubikon. In: ZEITdokument 1/2002. Stammzellen. Embryonen als Ersatzteillager?, S. 54-56.
- [Zeit 7.6.01] Bahnsen, Ulrich (2001): Heiße Ware aus Haifa. In: ZEITdokument 1/2002. Stammzellen. Embryonen als Ersatzteillager?, S. 23-24.
- [Zeit 7.6.01] Schnabel, Ulrich (2001): Ohne Mutter keine Menschenwürde. In: ZEITdokument 1/2002. Stammzellen. Embryonen als Ersatzteillager?, S. 25-26.

- [Zeit 21.6.01] Rau, Johannes: Der Bürger Rau zum Bürger Markl. Rede des Bundespräsidenten Johannes Rau auf der Hauptversammlung der Max-Planck-Gesellschaft am 25.Juni 2001. In: Die Zeit vom 21.Juni 2001.
- [Zeit 22.6.01] Markl, Hubert (2001): Freiheit, Verantwortung, Menschenwürde. In: In: ZEITdokument 1/2002. Stammzellen. Embryonen als Ersatzteillager?, S. 38-43.
- [Zeit 5.7.01] Bahnsen, Ulrich u.a. (2001): Kleine Zellen, große Sprengkraft. In: ZEITdokument 1/2002. Stammzellen. Embryonen als Ersatzteillager?, S. 27-29.
- [Zeit 5.7.01] Schuh, Hans u.a. (2001): Ein Importverbot wäre verfassungswidrig. Ein Gespräch mit Jochen Taupitz. In: ZEITdokument 1/2002. Stammzellen. Embryonen als Ersatzteillager?, S. 64-65.
- [Zeit 26.7.01] Klingst, Martin (2001): Selektion ist nicht akzeptabel. Ein Gespräch mit Herta Däubler-Gmelin. Interview. In: ZEITdokument 1/2002. Stammzellen. Embryonen als Ersatzteillager?, S. 48-50.
- [Zeit 16.8.01] Müller, Michael (2001): Wissenschaftsfreiheit? Eine Schimäre. In: ZEITdokument 1/2002. Stammzellen. Embryonen als Ersatzteillager?, S. 61-63.
- [Zeit 22.11.01] Albrecht, Harro (2001): Im Zweifel ohne Bundestag. Ein Gespräch mit Ernst-Ludwig Winnacker. Interview. In: ZEITdokument 1/2002. Stammzellen. Embryonen als Ersatzteillager?, S. 30-31.
- [Zeit 24.1.02] Fritz-Vannahme, Joachim (2002): Moral aus der Retorte. In: ZEITdokument 1/2002. Stammzellen. Embryonen als Ersatzteillager?, S. 69-70.
- [Zeit 24.1.02] Assheuer, Thomas u.a. (2001): Auf schiefer Ebene. Ein Gespräch mit Jürgen Habermas. In: ZEITdokument 1/2002. Stammzellen. Embryonen als Ersatzteillager?, S. 99-102.

## b) analysierte Dokumente nach Nummer der Ausgabe

- [Zeit 47/1998] Willmann, Urs (1998): Hände weg vom Embryo? Wird es spannend, müssen deutsche Forscher passen. In: Die Zeit vom 19.11.1998.
- [Zeit 26/99] Schuh, Hans (1999): Menschen, Klone, Sensationen. US-Forscher kopieren menschliche Zellen – angeblich nur für medizinische Zwecke. Doch nicht jeder glaubt ihnen. In: Die Zeit 26/1999.
- [Zeit 34/99] Geisler, Anika: Die Ohrmacher. Deutsche Forscher züchten menschliche Organe im Reagenzglas.
- [Zeit 10/00] Albrecht, Harro (2000): Reservezellen aus dem Körper. In: Die Zeit 10/2000.
- [Zeit 35/00] Bartens, Werner (2000): Revolutionäre Zellen. In: Die Zeit Nr. 35/2000.
- [Zeit 01/01] Bahnsen, Ulrich (2001): „Ein eindeutiges Ja“ Interview mit Claus Bartram. In: Die Zeit 01/2001.
- [Zeit 10/01] Hösle, Vittorio (2001): Heilung um jeden Preis? Wer einem Kleinkind Grundrechte zuspricht, kann sie einem Embryo nicht nehmen. In: Die Zeit 10/2001.
- [Zeit 11/01] Assheuer, Thomas (2001): Embryos bleiben tabu. Was lehrt uns die Kontroverse über das therapeutische Klonen? In: Die Zeit 11/2001.

- [Zeit 11/01] Bahnsen, Ulrich (2001): Das ist ein Traum, ein Albtraum. Der britische Klonforscher Ian Wilmut, Vater von Dolly, hofft auf die Forschung an Embryonen und warnt vor dem geklonten Menschen. In: Die Zeit 11/2001.
- [Zeit 12/01] Assheuer, Thomas (2001): Der künstliche Mensch. Die jüngste Revolution der Genwissenschaft entfesselt bizarre Fantasien. Intellektuelle träumen vom Zeitalter der Hypermoderne, in der die Natur restlos überwunden ist und der Mensch sich künstlich selbst erschafft. In: Die Zeit 12/2001.
- [Zeit 19/01] Sentker, Andreas (2001): Plädoyer für die Embryoforschung. In Die Zeit 19/2001.
- [Zeit 19/01] van den Daele, Wolfgang (2001): Zweierlei Moral. Forschung an embryonalen Stammzellen? Im Ethikrat der Gesundheitsministerin war kein Konsens in Sicht. Nun wird der Rat aufgelöst. In: Die Zeit 19/2001.
- [Zeit 20/01] Leicht, Robert (2001): Ein Rat der Anständigen. In: Die Zeit (02.05.2001).
- [Zeit 20/01] Naumann, Michael (2001): Biomasse Mensch. Der Embryo ist kein Ersatzteillager. In: Die Zeit 20/2001.
- [Zeit 21/01] Leicht, Robert (2001): Prometheus in der Falle. Schröders Biopolitik spaltet Kabinett, Koalition und Nation. In: Die Zeit 21/2001.
- [Zeit 21/01] Ross, Jan (2001): Die haltlosen Helfer. Auf dem Weg zur Sondermoral? Wie Medizin und Biotechnologie mit dem Appell an unser Mitleid ethische Grenzen verwischen. In: Die Zeit 21/2001.
- [Zeit 21/01] Schuh, Hans u.a. (2001): Austragen statt töten. Was tun mit überzähligen Embryonen? Ein Gespräch mit der Bioethikerin Regine Kollek über die gesellschaftliche Legitimation biotechnischer Forschung. In: Die Zeit 21/2001.
- [Zeit 21/01] Thadden, Elisabeth von (2001): Ohne Frauen kein Embryo. Die weibliche Lebenswirklichkeit kommt in der Debatte um die Präimplantationsdiagnostik zu kurz. In: Die Zeit 21/2001.
- [Zeit 22/01] Hofmann, Gunter (2001): Die Schlacht am Rubikon. Ethik gegen Ethik: Im Berliner Streit um die Biomedizin wächst die Angst vor dem moralischen Bürgerkrieg. In: Die Zeit 22/2001.
- [Zeit 23/01] Bahnsen, Ulrich (2001): Verjüngungskur aus Erkrath. Eine deutsche Bio-Tech-Firma drängt ins Geschäft mit Stammzellen. Das Embryonenschutzgesetz wird sie nicht hindern. In: Die Zeit 23/2001.
- [Zeit 23/01] Krönig, Jürgen (2001): Forschende Briten forschen. An der Themse wird nicht weniger ernsthaft diskutiert als an der Spree. Doch die Prioritäten der Biopolitik sind andere. In: Die Zeit 23/2001.
- [Zeit 23/01] Leicht, Robert (2001): Mein ist die Moral? Nein. Wider den Fundamentalismus in der Bioethik. In: Die Zeit 23/2001.
- [Zeit 24/01] Bartens, Werner (2001): Ei, Ei, Ei verboten. Die deutsche Rechtslage. In: Die Zeit 24/2001.
- [Zeit 24/01] Leicht, Robert (2001): Das künftige Embryonenschutz-Gesetz. Resümee nach der Bundestagsdebatte: Wer Splitter der Ethikdiskussion zusammensetzt, erkennt darin die Biopolitik von morgen. In: Die Zeit 24/2001.
- [Zeit 24/01] Schnabel, Ulrich (2001): Ohne Mutter keine Menschenwürde. Die Reproduktionsmedizin steht in Israel hoch im Kurs, die Zusammenarbeit mit Deutschland auch. In: Die Zeit 24/2001.
- [Zeit 28/01] Schuh, Hans/Spiwak, Martin (2001): „Ein Importverbot wäre verfassungswidrig“. Der Jurist und Bioethiker Jochen Taupitz hält die Gewinnung von embryonalen Stammzellen in Deutschland für legitim. In: Die Zeit 28/2001.

[Zeit 31/01] Klingst, Martin, u.a. (2001): „Selektion ist nicht akzeptabel“. Herta Däubler-Gmelin nimmt kein Blatt vor den Mund. Im Zeit-Gespräch über Biopolitik warnt die Justizministerin vor Tabuverletzungen in der Medizin. In: Die Zeit 31/2001.

[Zeit 32/01] Assheuer, Thomas (2001): Siehe, kein Mensch? Die Bioethik wird zur Zerreißprobe. In: Die Zeit 32/2001.

[Zeit 6/02] Bahnsen, Ulrich (2002): Verborgener Jungbrunnen. Leben im Menschen noch Embryozellen? Forscher haben multipotente Zellen im Knochenmark gefunden. In: Die Zeit 06/2002.

## Sonstige Quellen

Aus dem Bauch heraus. Vielversprechende Stammzellen im Fruchtwasser gefunden. In: Süddeutsche Zeitung vom 9.1.2007, 16.

Baudrillard, Jean: Das Original und sein Double. Aus dem Französischen von Uli Aumüller. In: Die Zeit vom 14.3.1997.

Koch, Kurt (2003): Grenzen in der (Bio-)Medizin: Verfügbarkeit über das Leben? Online unter: [http://www.kath.ch/news/upload\\_bistum-basel\\_dokument/grenzenbiomedizin.pdf](http://www.kath.ch/news/upload_bistum-basel_dokument/grenzenbiomedizin.pdf)

Markl, Hubert (2001): Freiheit, Verantwortung, Menschenwürde: Warum Lebenswissenschaften mehr sind als Biologie. Ansprache des Präsidenten Hubert Markl anlässlich der 52. Ordentlichen Hauptversammlung der Max-Planck-Gesellschaft zur Förderung der Wissenschaften am 22.06.2001 in Berlin. [abgedruckt in: ZEITdokument 1/2002]

Rau, Johannes (2001): „Wird alles gut?“ Für einen Fortschritt nach menschlichem Maß. Berliner Rede vom 18.5.2001, gehalten im Otto-Braun-Saal der Staatsbibliothek zu Berlin. [online unter <http://www.institutfuerglaubeundwissenschaft.de/texte/rau.pdf> ; abgedruckt in: ZEITdokument 1/2002]

Schröder, Gerhard (20.12.2000): Beitrag zur Gentechnik. In: Die Woche. 20.12.2000.

## Quellensammlungen

Geyer, Christian (2001) (Hrsg.): Biopolitik. Die Positionen, Frankfurt/Main: Suhrkamp.

ZEITdokument 1/2002: Stammzellen. Embryonen als Ersatzteillager? Hamburg: Zeitverlag.
